# Supplementary material for: The dual role of amyloid-β-sheet sequences in the cell surface properties of FLO11-encoded flocculins in Saccharomyces cerevisiae
Source: eLife. 2021 Sep 1;10:e68592. doi: 10.7554/eLife.68592 (PMC8457840; doi:10.7554/eLife.68592)
Supplement: Supplementary file 3. [file elife-68592-supp3.xlsx]

## Sheet: protocol proteomic
Supplementary File 3: Proteomic analysis of cell wall/cell membrane preparation from L69 strain.
1- Preparation of the samples
Cell wall and membrane fractions from L69 strain expressing Flo11-His and their variants also bearing a His-tag at their C-terminus were prepared using the procedure described by Sarode et al. {Sarode, 2011 #11546} with some modifications. Briefly, the pellet obtained after cell breakage by centrifugation at 10000 g for 30 min was digested 2h at 37°C by in 300 µl of a sodium acetate buffer 50 mM …
2) Proteomic analysis
Samples obtained as descrined (100µg in 5% SDS) were reduced and alkyled with a 100mM TCEP, 400mM Chloro Acetamide solution for 5 min at 95°C. The proteins were acidified with a final concentration of 1.2% phosphoric acid and diluted with 7 volumes of S-Trap buffer (90% Methanol, 100 mM triethylammonium bicarbonate (TEAB), pH 7.1).The samples were then transferred into S-Trap Mini Spin columns (P…
The peptides were analysed by nano-liquid chromatography – tandem mass spectrometry (MS/MS) using an UltiMate 3000 RSLCnano system (Dionex, Amsterdam, The Netherlands) coupled to an OrbiTrap Q-Exactive mass spectrometer (Thermo Fisher Scientific, Bremen, Germany). Five microliters of each sample was loaded onto a C18 pre-column (300 μm id, 5 mm; Dionex), at 20 μl/min, in 5% acetonitrile and 0.05%…
Mass spectrometry raw files were analyzed using the Proline software version 1.6. MS/MS Spectra were searched in the Mascot search engine (Matrix Science Inc., Boston, MA, USA) against the forward and reverse S_cerevisiae_UPS_20190326 database (https://www.uniprot.org/). The digestion enzyme was set to trypsin/P with up to two missed cleavages. Methionine were searched as variable modifications a…

## Sheet: Protein sets
Supplementary File 3: listing of proteins identified
protein_set_id	accession	gene_name	description	protein_set_score	is_validated	selection_level	MW	#peptides	#specific_peptides	spectral_count	specific_spectral_count	quantified_peptides_count	peptides_count_L69 F tryp	psm_count_L69 F tryp	raw_abundance_L69 F tryp	abundance_L69 F tryp
76690	CWP1_YEAST	CWP1	sp|P28319|CWP1_YEAST Cell wall protein CWP1 OS=Saccharomyces cerevisiae (strain ATCC 204508 / S288c) GN=CWP1 PE=1 SV=2	921.239	true	2	24268	15	15	42	42	15	15	34	342622144	342622144
76753	PIR1_YEAS1	PIR1	sp|B3LQU0|PIR1_YEAS1 Cell wall mannoprotein PIR1 OS=Saccharomyces cerevisiae (strain RM11-1a) GN=PIR1 PE=3 SV=1	75.396	true	2	34638	3	1	6	1	3	3	6	31575826	31575826
76754	HS150_YEAS1	HSP150	sp|B3LPW4|HS150_YEAS1 Cell wall mannoprotein HSP150 OS=Saccharomyces cerevisiae (strain RM11-1a) GN=HSP150 PE=3 SV=1	98.553	true	2	36763	3	1	6	1	3	3	6	36549260	36549260
76755	CIS3_YEAS6	CIS3	sp|B5VL27|CIS3_YEAS6 Cell wall mannoprotein CIS3 OS=Saccharomyces cerevisiae (strain AWRI1631) GN=CIS3 PE=3 SV=1	103.618	true	2	23028	4	3	7	4	4	4	7	34918928	34918928
76813	AWA1_YEASK	AWA1	sp|Q8TGE1|AWA1_YEASK Cell wall protein AWA1 OS=Saccharomyces cerevisiae (strain Kyokai no. 7 / NBRC 101557) GN=AWA1 PE=1 SV=1	18.21	true	2	166884	1	1	1	1	1	1	1	779802	779802
76848	YJR1_YEAST	YJL171C	sp|P46992|YJR1_YEAST Cell wall protein YJL171C OS=Saccharomyces cerevisiae (strain ATCC 204508 / S288c) GN=YJL171C PE=1 SV=2	145.194	true	2	42958	3	3	3	3	3	3	3	6984913	6984913
76885	ECM33_YEAS2	ECM33	sp|C7GQJ1|ECM33_YEAS2 Cell wall protein ECM33 OS=Saccharomyces cerevisiae (strain JAY291) GN=ECM33 PE=3 SV=1	237.228	true	2	43843	5	5	15	15	5	5	14	75312736	75312736
76940	CRH1_YEAST	CRH1	sp|P53301|CRH1_YEAST Probable glycosidase CRH1 OS=Saccharomyces cerevisiae (strain ATCC 204508 / S288c) GN=CRH1 PE=1 SV=1	426.111	true	2	52758	11	11	20	20	11	11	16	65784440	65784440
77011	BGL2_YEAST	BGL2	sp|P15703|BGL2_YEAST Glucan 1,3-beta-glucosidase OS=Saccharomyces cerevisiae (strain ATCC 204508 / S288c) GN=BGL2 PE=1 SV=1	85.191	true	2	34119	3	3	3	3	3	3	3	1.85794e+06	1.85794e+06
77015	GAS1_YEAST	GAS1	sp|P22146|GAS1_YEAST 1,3-beta-glucanosyltransferase GAS1 OS=Saccharomyces cerevisiae (strain ATCC 204508 / S288c) GN=GAS1 PE=1 SV=2	403.769	true	2	59582	8	8	12	12	8	8	9	34896808	34896808
77031	CCW14_YEAST	CCW14	sp|O13547|CCW14_YEAST Covalently-linked cell wall protein 14 OS=Saccharomyces cerevisiae (strain ATCC 204508 / S288c) GN=CCW14 PE=1 SV=1	102.653	true	2	23268	2	2	3	3	2	2	2	2.07262e+06	2.07262e+06
77082	CHS5_YEAST	CHS5	sp|Q12114|CHS5_YEAST Chitin biosynthesis protein CHS5 OS=Saccharomyces cerevisiae (strain ATCC 204508 / S288c) GN=CHS5 PE=1 SV=1	36.916	true	2	73639	2	2	2	2	2	2	2	543162	543162
77162	YPS1_YEAST	YPS1	sp|P32329|YPS1_YEAST Aspartic proteinase 3 OS=Saccharomyces cerevisiae (strain ATCC 204508 / S288c) GN=YPS1 PE=1 SV=2	52.778	true	2	60010	2	2	2	2	2	2	2	1.02559e+06	1.02559e+06
77184	PST1_YEAS7	PST1	sp|A6ZY20|PST1_YEAS7 Cell wall mannoprotein PST1 OS=Saccharomyces cerevisiae (strain YJM789) GN=PST1 PE=3 SV=1	49.718	true	2	45807	1	1	1	1	1	1	1	1.20443e+06	1.20443e+06
77191	YGP1_YEAST	YGP1	sp|P38616|YGP1_YEAST Protein YGP1 OS=Saccharomyces cerevisiae (strain ATCC 204508 / S288c) GN=YGP1 PE=1 SV=2	141.547	true	2	37328	4	4	7	7	4	4	7	17549960	17549960
77203	GAS5_YEAST	GAS5	sp|Q08193|GAS5_YEAST 1,3-beta-glucanosyltransferase GAS5 OS=Saccharomyces cerevisiae (strain ATCC 204508 / S288c) GN=GAS5 PE=1 SV=1	134.354	true	2	51870	3	3	4	4	3	3	3	6399801	6399801
77226	SPA2_YEAST	SPA2	sp|P23201|SPA2_YEAST Protein SPA2 OS=Saccharomyces cerevisiae (strain ATCC 204508 / S288c) GN=SPA2 PE=1 SV=1	35.397	true	2	163143	2	2	2	2	2	2	2	496042	496042
77280	PST2_YEAST	PST2	sp|Q12335|PST2_YEAST Protoplast secreted protein 2 OS=Saccharomyces cerevisiae (strain ATCC 204508 / S288c) GN=PST2 PE=1 SV=1	93.165	true	2	20966	2	2	4	4	2	2	3	1749267	1749267
77314	EXG2_YEAST	EXG2	sp|P52911|EXG2_YEAST Glucan 1,3-beta-glucosidase 2 OS=Saccharomyces cerevisiae (strain ATCC 204508 / S288c) GN=EXG2 PE=1 SV=1	66.165	true	2	63508	2	2	2	2	2	2	2	684189	684189
77328	SCW4_YEAST	SCW4	sp|P53334|SCW4_YEAST Probable family 17 glucosidase SCW4 OS=Saccharomyces cerevisiae (strain ATCC 204508 / S288c) GN=SCW4 PE=1 SV=1	115.978	true	2	40173	3	3	3	3	3	3	3	952583	952583
77341	GAS3_YEAST	GAS3	sp|Q03655|GAS3_YEAST Probable 1,3-beta-glucanosyltransferase GAS3 OS=Saccharomyces cerevisiae (strain ATCC 204508 / S288c) GN=GAS3 PE=1 SV=1	211.1	true	2	56794	4	4	4	4	4	4	4	3.80792e+06	3.80792e+06
76702	SGT2_YEAST	SGT2	sp|Q12118|SGT2_YEAST Small glutamine-rich tetratricopeptide repeat-containing protein 2 OS=Saccharomyces cerevisiae (strain ATCC 204508 / S288c) GN=SGT2 PE=1 SV=1	548.648	true	2	37218	15	15	19	19	15	15	16	22082882	22082882
76747	HS104_YEAST	HSP104	sp|P31539|HS104_YEAST Heat shock protein 104 OS=Saccharomyces cerevisiae (strain ATCC 204508 / S288c) GN=HSP104 PE=1 SV=2	199.147	true	2	102035	8	8	8	8	8	8	8	3.5298e+06	3.5298e+06
76814	HSP76_YEAST	SSB2	sp|P40150|HSP76_YEAST Heat shock protein SSB2 OS=Saccharomyces cerevisiae (strain ATCC 204508 / S288c) GN=SSB2 PE=1 SV=2	1101.69	true	2	66595	26	26	35	35	26	26	30	110148720	110148720
76861	HSP79_YEAST	SSE2	sp|P32590|HSP79_YEAST Heat shock protein homolog SSE2 OS=Saccharomyces cerevisiae (strain ATCC 204508 / S288c) GN=SSE2 PE=1 SV=3	75.185	true	2	77621	2	1	2	1	2	2	2	1822080	1822080
76862	HSP7F_YEAST	SSE1	sp|P32589|HSP7F_YEAST Heat shock protein homolog SSE1 OS=Saccharomyces cerevisiae (strain ATCC 204508 / S288c) GN=SSE1 PE=1 SV=4	389.667	true	2	77366	12	11	14	13	12	12	12	12407798	12407798
76869	HSP71_YEAST	SSA1	sp|P10591|HSP71_YEAST Heat shock protein SSA1 OS=Saccharomyces cerevisiae (strain ATCC 204508 / S288c) GN=SSA1 PE=1 SV=4	619.618	true	2	69657	21	5	28	6	21	21	25	52781768	52781768
76870	HSP74_YEAST	SSA4	sp|P22202|HSP74_YEAST Heat shock protein SSA4 OS=Saccharomyces cerevisiae (strain ATCC 204508 / S288c) GN=SSA4 PE=1 SV=3	376.996	true	2	69651	10	2	13	2	10	10	13	23279092	23279092
76872	HSP72_YEAST	SSA2	sp|P10592|HSP72_YEAST Heat shock protein SSA2 OS=Saccharomyces cerevisiae (strain ATCC 204508 / S288c) GN=SSA2 PE=1 SV=3	766.444	true	2	69470	23	5	31	7	23	23	29	55984912	55984912
76886	HSP77_YEAST	SSC1	sp|P0CS90|HSP77_YEAST Heat shock protein SSC1, mitochondrial OS=Saccharomyces cerevisiae (strain ATCC 204508 / S288c) GN=SSC1 PE=1 SV=1	537.67	true	2	70628	14	12	17	15	14	14	16	11818063	11818063
77145	HSP82_YEAST	HSP82	sp|P02829|HSP82_YEAST ATP-dependent molecular chaperone HSP82 OS=Saccharomyces cerevisiae (strain ATCC 204508 / S288c) GN=HSP82 PE=1 SV=1	546.175	true	2	81406	22	4	29	4	22	22	28	24861934	24861934
77146	HSC82_YEAST	HSC82	sp|P15108|HSC82_YEAST ATP-dependent molecular chaperone HSC82 OS=Saccharomyces cerevisiae (strain ATCC 204508 / S288c) GN=HSC82 PE=1 SV=4	658.04	true	2	80900	23	5	31	6	23	23	29	27650288	27650288
77169	HSP42_YEAST	HSP42	sp|Q12329|HSP42_YEAST Heat shock protein 42 OS=Saccharomyces cerevisiae (strain ATCC 204508 / S288c) GN=HSP42 PE=1 SV=1	19.681	true	2	42817	1	1	1	1	1	1	1	273434	273434
77189	STI1_YEAST	STI1	sp|P15705|STI1_YEAST Heat shock protein STI1 OS=Saccharomyces cerevisiae (strain ATCC 204508 / S288c) GN=STI1 PE=1 SV=1	807.285	true	2	66265	22	22	31	31	22	22	27	62629732	62629732
77208	CDC37_YEAST	CDC37	sp|P06101|CDC37_YEAST Hsp90 co-chaperone Cdc37 OS=Saccharomyces cerevisiae (strain ATCC 204508 / S288c) GN=CDC37 PE=1 SV=2	62.96	true	2	58385	2	2	2	2	2	2	2	1.48123e+06	1.48123e+06
77358	DPM1_YEAST	DPM1	sp|P14020|DPM1_YEAST Dolichol-phosphate mannosyltransferase OS=Saccharomyces cerevisiae (strain ATCC 204508 / S288c) GN=DPM1 PE=1 SV=3	81.56	true	2	30362	2	2	2	2	2	2	2	680994	680994
76680	RS27A_YEAST	RPS31	sp|P05759|RS27A_YEAST Ubiquitin-40S ribosomal protein S31 OS=Saccharomyces cerevisiae (strain ATCC 204508 / S288c) GN=RPS31 PE=1 SV=3	188.622	true	2	17216	5	5	19	19	5	5	16	45015784	45015784
76681	LSP1_YEAST	LSP1	sp|Q12230|LSP1_YEAST Sphingolipid long chain base-responsive protein LSP1 OS=Saccharomyces cerevisiae (strain ATCC 204508 / S288c) GN=LSP1 PE=1 SV=1	321.577	true	2	38071	9	8	10	9	9	9	10	17589300	17589300
76682	PIL1_YEAST	PIL1	sp|P53252|PIL1_YEAST Sphingolipid long chain base-responsive protein PIL1 OS=Saccharomyces cerevisiae (strain ATCC 204508 / S288c) GN=PIL1 PE=1 SV=1	286.186	true	2	38349	9	8	12	11	9	9	11	17153976	17153976
76683	RTK1_YEAST	RTK1	sp|Q12100|RTK1_YEAST Probable serine/threonine-protein kinase RTK1 OS=Saccharomyces cerevisiae (strain ATCC 204508 / S288c) GN=RTK1 PE=1 SV=1	22.057	true	2	69615	2	2	2	2	2	2	2	892929	892929
76684	VPS1_YEAST	VPS1	sp|P21576|VPS1_YEAST Vacuolar protein sorting-associated protein 1 OS=Saccharomyces cerevisiae (strain ATCC 204508 / S288c) GN=VPS1 PE=1 SV=2	100.354	true	2	78737	4	4	4	4	4	4	4	4.18204e+06	4.18204e+06
76685	NU116_YEAST	NUP116	sp|Q02630|NU116_YEAST Nucleoporin NUP116/NSP116 OS=Saccharomyces cerevisiae (strain ATCC 204508 / S288c) GN=NUP116 PE=1 SV=2	54.306	true	2	116234	2	2	2	2	2	2	2	1.32634e+06	1.32634e+06
76686	SYA_YEAST	ALA1	sp|P40825|SYA_YEAST Alanine--tRNA ligase, mitochondrial OS=Saccharomyces cerevisiae (strain ATCC 204508 / S288c) GN=ALA1 PE=1 SV=3	18.603	true	2	110059	1	1	1	1	1	1	1	377835	377835
76687	VATB_YEAST	VMA2	sp|P16140|VATB_YEAST V-type proton ATPase subunit B OS=Saccharomyces cerevisiae (strain ATCC 204508 / S288c) GN=VMA2 PE=1 SV=2	126.811	true	2	57749	5	5	5	5	5	5	5	1.58257e+06	1.58257e+06
76688	CBP4_YEAS1	CBP4	sp|B3LI56|CBP4_YEAS1 Assembly factor CBP4 OS=Saccharomyces cerevisiae (strain RM11-1a) GN=CBP4 PE=3 SV=2	27.41	true	2	17532	3	3	3	3	3	3	3	1.80327e+06	1.80327e+06
76689	PFD1_YEAST	PFD1	sp|P46988|PFD1_YEAST Prefoldin subunit 1 OS=Saccharomyces cerevisiae (strain ATCC 204508 / S288c) GN=PFD1 PE=1 SV=2	24.035	true	2	12782	2	2	2	2	2	2	2	1420381	1420381
76691	SDHF3_YEAST	SDH7	sp|Q04401|SDHF3_YEAST Succinate dehydrogenase assembly factor 3, mitochondrial OS=Saccharomyces cerevisiae (strain ATCC 204508 / S288c) GN=SDH7 PE=1 SV=1	96.372	true	2	15783	2	2	2	2	2	2	2	3.85122e+06	3.85122e+06
76692	SPG4_YEAS1	SPG4	sp|B3LLZ8|SPG4_YEAS1 Stationary phase protein 4 OS=Saccharomyces cerevisiae (strain RM11-1a) GN=SPG4 PE=3 SV=1	318.063	true	2	13180	8	8	11	11	8	8	9	27164626	27164626
76693	EIS1_YEASV	EIS1	sp|E7LYB2|EIS1_YEASV Eisosome protein 1 OS=Saccharomyces cerevisiae (strain VIN 13) GN=EIS1 PE=3 SV=1	811.752	true	2	93309	27	3	30	3	26	26	28	28194056	28194056
76694	EIS1_YEAS1	EIS1	sp|B3LLS9|EIS1_YEAS1 Eisosome protein 1 OS=Saccharomyces cerevisiae (strain RM11-1a) GN=EIS1 PE=3 SV=1	827.13	true	2	93387	28	4	31	4	27	27	29	28797380	28797380
76695	RCF1_YEAS1	RCF1	sp|B3LLM2|RCF1_YEAS1 Respiratory supercomplex factor 1, mitochondrial OS=Saccharomyces cerevisiae (strain RM11-1a) GN=RCF1 PE=3 SV=1	33.034	true	2	18477	2	2	2	2	2	2	2	721731	721731
76696	METK1_YEAST	SAM1	sp|P10659|METK1_YEAST S-adenosylmethionine synthase 1 OS=Saccharomyces cerevisiae (strain ATCC 204508 / S288c) GN=SAM1 PE=1 SV=2	214.737	true	2	41818	7	7	9	9	7	7	7	3.98418e+06	3.98418e+06
76697	HSP31_YEAST	HSP31	sp|Q04432|HSP31_YEAST Glutathione-independent glyoxalase HSP31 OS=Saccharomyces cerevisiae (strain ATCC 204508 / S288c) GN=HSP31 PE=1 SV=1	32.984	true	2	25670	1	1	1	1	1	1	1	663724	663724
76698	NHP6B_YEAST	NHP6B	sp|P11633|NHP6B_YEAST Non-histone chromosomal protein 6B OS=Saccharomyces cerevisiae (strain ATCC 204508 / S288c) GN=NHP6B PE=1 SV=3	131.979	true	2	11476	4	4	7	7	4	4	5	11229503	11229503
76699	ILV3_YEAST	ILV3	sp|P39522|ILV3_YEAST Dihydroxy-acid dehydratase, mitochondrial OS=Saccharomyces cerevisiae (strain ATCC 204508 / S288c) GN=ILV3 PE=1 SV=2	58.853	true	2	62861	2	2	2	2	2	2	2	1.66965e+06	1.66965e+06
76700	YJ133_YEAST	YJL133C-A	sp|Q3E7A3|YJ133_YEAST Uncharacterized protein YJL133C-A OS=Saccharomyces cerevisiae (strain ATCC 204508 / S288c) GN=YJL133C-A PE=1 SV=1	37.785	true	2	7741	1	1	1	1	1	1	1	170185	170185
76701	RL1A_YEAST	RPL1A	sp|P0CX43|RL1A_YEAST 60S ribosomal protein L1-A OS=Saccharomyces cerevisiae (strain ATCC 204508 / S288c) GN=RPL1A PE=1 SV=1	63.506	true	2	24486	3	3	3	3	3	3	3	2.25583e+06	2.25583e+06
76703	RL2A_YEAST	RPL2A	sp|P0CX45|RL2A_YEAST 60S ribosomal protein L2-A OS=Saccharomyces cerevisiae (strain ATCC 204508 / S288c) GN=RPL2A PE=1 SV=1	135.634	true	2	27408	7	7	8	8	7	7	7	14361087	14361087
76704	PRX1_YEAST	PRX1	sp|P34227|PRX1_YEAST Mitochondrial peroxiredoxin PRX1 OS=Saccharomyces cerevisiae (strain ATCC 204508 / S288c) GN=PRX1 PE=1 SV=1	122.484	true	2	29496	3	3	4	4	3	3	4	5878372	5878372
76705	RM50_YEAST	MRPL50	sp|P53724|RM50_YEAST 54S ribosomal protein L50, mitochondrial OS=Saccharomyces cerevisiae (strain ATCC 204508 / S288c) GN=MRPL50 PE=1 SV=1	54.834	true	2	16283	3	3	4	4	3	3	3	3.99292e+06	3.99292e+06
76706	SODC_YEAST	SOD1	sp|P00445|SODC_YEAST Superoxide dismutase [Cu-Zn] OS=Saccharomyces cerevisiae (strain ATCC 204508 / S288c) GN=SOD1 PE=1 SV=2	322.238	true	2	15855	9	9	17	17	9	9	15	63281052	63281052
76707	RV167_YEAST	RVS167	sp|P39743|RV167_YEAST Reduced viability upon starvation protein 167 OS=Saccharomyces cerevisiae (strain ATCC 204508 / S288c) GN=RVS167 PE=1 SV=1	57.634	true	2	52774	2	2	2	2	2	2	2	433366	433366
76708	NACB1_YEAS7	EGD1	sp|A6ZWL1|NACB1_YEAS7 Nascent polypeptide-associated complex subunit beta-1 OS=Saccharomyces cerevisiae (strain YJM789) GN=EGD1 PE=3 SV=1	239.969	true	2	17020	5	5	8	8	5	5	6	36172744	36172744
76709	RPA49_YEAST	RPA49	sp|Q01080|RPA49_YEAST DNA-directed RNA polymerase I subunit RPA49 OS=Saccharomyces cerevisiae (strain ATCC 204508 / S288c) GN=RPA49 PE=1 SV=2	29.403	true	2	46651	1	1	1	1	1	1	1	558916	558916
76710	SHE3_YEAS1	SHE3	sp|B3LN26|SHE3_YEAS1 SWI5-dependent HO expression protein 3 OS=Saccharomyces cerevisiae (strain RM11-1a) GN=SHE3 PE=3 SV=1	35.982	true	2	47516	2	2	2	2	2	2	2	744760	744760
76711	CHZ1_YEAS7	CHZ1	sp|A6ZQX9|CHZ1_YEAS7 Histone H2A.Z-specific chaperone CHZ1 OS=Saccharomyces cerevisiae (strain YJM789) GN=CHZ1 PE=3 SV=2	24.191	true	2	18409	1	1	1	1	1	1	1	1.0629e+06	1.0629e+06
76712	HEK2_YEAS2	HEK2	sp|C7GND0|HEK2_YEAS2 Heterogeneous nuclear rnp K-like protein 2 OS=Saccharomyces cerevisiae (strain JAY291) GN=HEK2 PE=3 SV=1	47.319	true	2	41698	2	2	2	2	2	2	2	969197	969197
76713	UBX1_YEAST	SHP1	sp|P34223|UBX1_YEAST UBX domain-containing protein 1 OS=Saccharomyces cerevisiae (strain ATCC 204508 / S288c) GN=SHP1 PE=1 SV=1	255.61	true	2	46987	7	7	7	7	7	7	7	6402145	6402145
76714	THO1_YEAST	THO1	sp|P40040|THO1_YEAST Protein THO1 OS=Saccharomyces cerevisiae (strain ATCC 204508 / S288c) GN=THO1 PE=1 SV=1	118.167	true	2	24138	5	5	5	5	5	5	5	7.83418e+06	7.83418e+06
76715	KC12_YEAST	YCK2	sp|P23292|KC12_YEAST Casein kinase I homolog 2 OS=Saccharomyces cerevisiae (strain ATCC 204508 / S288c) GN=YCK2 PE=1 SV=1	65.378	true	2	62079	2	1	2	1	2	2	2	527333	527333
76716	KC11_YEAST	YCK1	sp|P23291|KC11_YEAST Casein kinase I homolog 1 OS=Saccharomyces cerevisiae (strain ATCC 204508 / S288c) GN=YCK1 PE=1 SV=1	36.082	true	2	61715	2	1	2	1	2	2	2	716794	716794
76717	RT21_YEAST	MRP21	sp|P38175|RT21_YEAST 37S ribosomal protein MRP21, mitochondrial OS=Saccharomyces cerevisiae (strain ATCC 204508 / S288c) GN=MRP21 PE=1 SV=1	51.334	true	2	20395	2	2	2	2	2	2	2	1.0477e+06	1.0477e+06
76718	GON7_YEAST	GON7	sp|P46984|GON7_YEAST EKC/KEOPS complex subunit GON7 OS=Saccharomyces cerevisiae (strain ATCC 204508 / S288c) GN=GON7 PE=1 SV=1	66.69	true	2	13605	2	2	2	2	2	2	2	749491	749491
76719	RS18A_YEAST	RPS18A	sp|P0CX55|RS18A_YEAST 40S ribosomal protein S18-A OS=Saccharomyces cerevisiae (strain ATCC 204508 / S288c) GN=RPS18A PE=1 SV=1	157.801	true	2	17038	4	4	4	4	4	4	4	4168229	4168229
76720	ENO2_YEAST	ENO2	sp|P00925|ENO2_YEAST Enolase 2 OS=Saccharomyces cerevisiae (strain ATCC 204508 / S288c) GN=ENO2 PE=1 SV=2	694.224	true	2	46914	17	8	20	9	17	17	17	25990236	25990236
76721	ENO1_YEAST	ENO1	sp|P00924|ENO1_YEAST Enolase 1 OS=Saccharomyces cerevisiae (strain ATCC 204508 / S288c) GN=ENO1 PE=1 SV=3	483.331	true	2	46816	10	1	12	1	10	10	10	17180076	17180076
76722	ADH1_YEAST	ADH1	sp|P00330|ADH1_YEAST Alcohol dehydrogenase 1 OS=Saccharomyces cerevisiae (strain ATCC 204508 / S288c) GN=ADH1 PE=1 SV=5	364.956	true	2	36849	11	11	14	14	11	11	12	24935488	24935488
76723	SSO2_YEAST	SSO2	sp|P39926|SSO2_YEAST Protein SSO2 OS=Saccharomyces cerevisiae (strain ATCC 204508 / S288c) GN=SSO2 PE=1 SV=2	186.558	true	2	33734	6	5	6	5	6	6	6	10387554	10387554
76724	SSO1_YEAST	SSO1	sp|P32867|SSO1_YEAST Protein SSO1 OS=Saccharomyces cerevisiae (strain ATCC 204508 / S288c) GN=SSO1 PE=1 SV=2	57.735	true	2	33106	2	1	2	1	2	2	2	5891384	5891384
76725	MBR1_YEAS1	MBR1	sp|B3LR01|MBR1_YEAS1 Mitochondrial biogenesis regulation protein 1 OS=Saccharomyces cerevisiae (strain RM11-1a) GN=MBR1 PE=3 SV=1	84.952	true	2	37106	3	3	3	3	3	3	3	917026	917026
76726	ENP1_YEAST	ENP1	sp|P38333|ENP1_YEAST Essential nuclear protein 1 OS=Saccharomyces cerevisiae (strain ATCC 204508 / S288c) GN=ENP1 PE=1 SV=1	54.501	true	2	55137	2	2	2	2	2	2	2	667770	667770
76727	AIM21_YEAS1	AIM21	sp|B3LTK6|AIM21_YEAS1 Altered inheritance of mitochondria protein 21 OS=Saccharomyces cerevisiae (strain RM11-1a) GN=AIM21 PE=3 SV=1	55.057	true	2	71620	4	4	4	4	4	4	4	1.78801e+06	1.78801e+06
76728	PTK2_YEAST	PTK2	sp|P47116|PTK2_YEAST Serine/threonine-protein kinase PTK2/STK2 OS=Saccharomyces cerevisiae (strain ATCC 204508 / S288c) GN=PTK2 PE=1 SV=1	10.822	true	2	91400	1	1	1	1	1	1	1	356459	356459
76729	JEN1_YEAST	JEN1	sp|P36035|JEN1_YEAST Carboxylic acid transporter protein homolog OS=Saccharomyces cerevisiae (strain ATCC 204508 / S288c) GN=JEN1 PE=1 SV=1	13.785	true	2	69376	1	1	1	1	1	1	1	977601	977601
76730	RL31A_YEAST	RPL31A	sp|P0C2H8|RL31A_YEAST 60S ribosomal protein L31-A OS=Saccharomyces cerevisiae (strain ATCC 204508 / S288c) GN=RPL31A PE=1 SV=1	216.05	true	2	12953	7	1	8	2	7	7	8	34603260	34603260
76731	RL31B_YEAST	RPL31B	sp|P0C2H9|RL31B_YEAST 60S ribosomal protein L31-B OS=Saccharomyces cerevisiae (strain ATCC 204508 / S288c) GN=RPL31B PE=1 SV=1	221.582	true	2	12967	7	1	7	1	7	7	7	31776910	31776910
76732	SAR1_YEAST	SAR1	sp|P20606|SAR1_YEAST Small COPII coat GTPase SAR1 OS=Saccharomyces cerevisiae (strain ATCC 204508 / S288c) GN=SAR1 PE=1 SV=1	27.331	true	2	21451	1	1	1	1	1	1	1	219126	219126
76733	FAR8_YEAST	FAR8	sp|Q05040|FAR8_YEAST Factor arrest protein 8 OS=Saccharomyces cerevisiae (strain ATCC 204508 / S288c) GN=FAR8 PE=1 SV=1	41.961	true	2	59301	2	2	2	2	2	2	2	995143	995143
76734	RL26B_YEAST	RPL26B	sp|P53221|RL26B_YEAST 60S ribosomal protein L26-B OS=Saccharomyces cerevisiae (strain ATCC 204508 / S288c) GN=RPL26B PE=1 SV=2	362.099	true	2	14235	14	14	26	26	14	14	21	135770336	135770336
76735	HXT5_YEAST	HXT5	sp|P38695|HXT5_YEAST Probable glucose transporter HXT5 OS=Saccharomyces cerevisiae (strain ATCC 204508 / S288c) GN=HXT5 PE=1 SV=1	126.676	true	2	66251	4	2	5	3	4	4	5	3858395	3858395
76736	HXT6_YEAST	HXT6	sp|P39003|HXT6_YEAST High-affinity hexose transporter HXT6 OS=Saccharomyces cerevisiae (strain ATCC 204508 / S288c) GN=HXT6 PE=1 SV=2	276.914	true	2	62705	11	9	13	11	11	11	11	26354504	26354504
76737	HRP1_YEAST	HRP1	sp|Q99383|HRP1_YEAST Nuclear polyadenylated RNA-binding protein 4 OS=Saccharomyces cerevisiae (strain ATCC 204508 / S288c) GN=HRP1 PE=1 SV=1	232.23	true	2	59650	5	5	7	7	5	5	6	5.08549e+06	5.08549e+06
76738	RL27A_YEAST	RPL27A	sp|P0C2H6|RL27A_YEAST 60S ribosomal protein L27-A OS=Saccharomyces cerevisiae (strain ATCC 204508 / S288c) GN=RPL27A PE=1 SV=1	156.865	true	2	15531	4	4	4	4	4	4	4	4.60169e+06	4.60169e+06
76739	RT103_YEAST	RTT103	sp|Q05543|RT103_YEAST Regulator of Ty1 transposition protein 103 OS=Saccharomyces cerevisiae (strain ATCC 204508 / S288c) GN=RTT103 PE=1 SV=1	62.575	true	2	46488	2	2	2	2	2	2	2	1.09947e+06	1.09947e+06
76740	RM13_YEAST	MRPL13	sp|Q02204|RM13_YEAST 54S ribosomal protein L13, mitochondrial OS=Saccharomyces cerevisiae (strain ATCC 204508 / S288c) GN=MRPL13 PE=1 SV=2	221.119	true	2	30271	6	6	7	7	6	6	6	3806215	3806215
76741	RM32_YEAST	MRPL32	sp|P25348|RM32_YEAST 54S ribosomal protein L32, mitochondrial OS=Saccharomyces cerevisiae (strain ATCC 204508 / S288c) GN=MRPL32 PE=1 SV=1	73.502	true	2	21437	2	2	2	2	2	2	2	3.99283e+06	3.99283e+06
76742	RS21B_YEAST	RPS21B	sp|Q3E754|RS21B_YEAST 40S ribosomal protein S21-B OS=Saccharomyces cerevisiae (strain ATCC 204508 / S288c) GN=RPS21B PE=1 SV=1	274.491	true	2	9760	6	1	14	3	6	6	11	77497008	77497008
76743	RS21A_YEAST	RPS21A	sp|P0C0V8|RS21A_YEAST 40S ribosomal protein S21-A OS=Saccharomyces cerevisiae (strain ATCC 204508 / S288c) GN=RPS21A PE=1 SV=1	262.856	true	2	9746	6	1	14	3	6	6	11	80017680	80017680
76744	RS3A1_YEAS1	RPS1A	sp|B3RHV0|RS3A1_YEAS1 40S ribosomal protein S1-A OS=Saccharomyces cerevisiae (strain RM11-1a) GN=RPS1A PE=3 SV=1	42.403	true	2	28743	3	1	3	1	3	3	3	2.10678e+06	2.10678e+06
76745	RS3A2_YEAS1	RPS1B	sp|B3LLJ2|RS3A2_YEAS1 40S ribosomal protein S1-B OS=Saccharomyces cerevisiae (strain RM11-1a) GN=RPS1B PE=3 SV=1	81.834	true	2	28812	3	1	3	1	3	3	3	2.0271e+06	2.0271e+06
76746	SYF2_YEAST	SYF2	sp|P53277|SYF2_YEAST Pre-mRNA-splicing factor SYF2 OS=Saccharomyces cerevisiae (strain ATCC 204508 / S288c) GN=SYF2 PE=1 SV=1	24.791	true	2	24803	1	1	1	1	1	1	1	460524	460524
76748	G3P3_YEAST	TDH3	sp|P00359|G3P3_YEAST Glyceraldehyde-3-phosphate dehydrogenase 3 OS=Saccharomyces cerevisiae (strain ATCC 204508 / S288c) GN=TDH3 PE=1 SV=3	365.084	true	2	35747	10	10	16	16	10	10	14	14846244	14846244
76749	RS22A_YEAST	RPS22A	sp|P0C0W1|RS22A_YEAST 40S ribosomal protein S22-A OS=Saccharomyces cerevisiae (strain ATCC 204508 / S288c) GN=RPS22A PE=1 SV=2	49.328	true	2	14626	2	2	2	2	2	2	2	1.91028e+06	1.91028e+06
76750	RS17A_YEAST	RPS17A	sp|P02407|RS17A_YEAST 40S ribosomal protein S17-A OS=Saccharomyces cerevisiae (strain ATCC 204508 / S288c) GN=RPS17A PE=1 SV=1	435.579	true	2	15788	9	9	18	18	9	9	13	50345568	50345568
76751	PDC1_YEAST	PDC1	sp|P06169|PDC1_YEAST Pyruvate decarboxylase isozyme 1 OS=Saccharomyces cerevisiae (strain ATCC 204508 / S288c) GN=PDC1 PE=1 SV=7	374.97	true	2	61495	11	11	13	13	11	11	13	16067626	16067626
76752	SPC42_YEAS1	SPC42	sp|B3LR46|SPC42_YEAS1 Spindle pole body component SPC42 OS=Saccharomyces cerevisiae (strain RM11-1a) GN=SPC42 PE=3 SV=1	59.866	true	2	42245	2	2	2	2	2	2	2	431857	431857
76756	CTR3_YEAST	CTR3	sp|Q06686|CTR3_YEAST Copper transport protein CTR3 OS=Saccharomyces cerevisiae (strain ATCC 204508 / S288c) GN=CTR3 PE=1 SV=1	74.575	true	2	27534	4	4	4	4	4	4	4	2.47888e+06	2.47888e+06
76757	ACT_YEAST	ACT1	sp|P60010|ACT_YEAST Actin OS=Saccharomyces cerevisiae (strain ATCC 204508 / S288c) GN=ACT1 PE=1 SV=1	249.612	true	2	41690	7	7	8	8	7	7	7	7770784	7770784
76758	ATPJ_YEAST	TIM11	sp|P81449|ATPJ_YEAST ATP synthase subunit e, mitochondrial OS=Saccharomyces cerevisiae (strain ATCC 204508 / S288c) GN=TIM11 PE=1 SV=2	140.963	true	2	10876	3	3	3	3	3	3	3	9323075	9323075
76759	ISF1_YEAS1	ISF1	sp|B3LLX4|ISF1_YEAS1 Increasing suppression factor 1 OS=Saccharomyces cerevisiae (strain RM11-1a) GN=ISF1 PE=3 SV=1	10.625	true	2	37136	1	1	1	1	1	1	1	540049	540049
76760	RS14A_YEAST	RPS14A	sp|P06367|RS14A_YEAST 40S ribosomal protein S14-A OS=Saccharomyces cerevisiae (strain ATCC 204508 / S288c) GN=RPS14A PE=1 SV=5	234.131	true	2	14537	6	6	6	6	6	6	6	6.50886e+06	6.50886e+06
76761	YNT4_YEAST	YNL194C	sp|P40169|YNT4_YEAST Uncharacterized plasma membrane protein YNL194C OS=Saccharomyces cerevisiae (strain ATCC 204508 / S288c) GN=YNL194C PE=1 SV=1	23.169	true	2	34081	1	1	1	1	1	1	1	2.49949e+06	2.49949e+06
76762	SAN1_YEAST	SAN1	sp|P22470|SAN1_YEAST Protein SAN1 OS=Saccharomyces cerevisiae (strain ATCC 204508 / S288c) GN=SAN1 PE=1 SV=1	25.447	true	2	65618	1	1	1	1	1	1	1	293455	293455
76763	RS3_YEAST	RPS3	sp|P05750|RS3_YEAST 40S ribosomal protein S3 OS=Saccharomyces cerevisiae (strain ATCC 204508 / S288c) GN=RPS3 PE=1 SV=5	169.181	true	2	26503	6	6	6	6	6	6	6	3.19834e+06	3.19834e+06
76764	RIR2_YEAST	RNR2	sp|P09938|RIR2_YEAST Ribonucleoside-diphosphate reductase small chain 1 OS=Saccharomyces cerevisiae (strain ATCC 204508 / S288c) GN=RNR2 PE=1 SV=2	40.184	true	2	46147	1	1	1	1	0
76765	VRP1_YEAST	VRP1	sp|P37370|VRP1_YEAST Verprolin OS=Saccharomyces cerevisiae (strain ATCC 204508 / S288c) GN=VRP1 PE=1 SV=2	67.699	true	2	82594	4	4	4	4	4	4	4	4.05241e+06	4.05241e+06
76766	AROG_YEAST	ARO4	sp|P32449|AROG_YEAST Phospho-2-dehydro-3-deoxyheptonate aldolase, tyrosine-inhibited OS=Saccharomyces cerevisiae (strain ATCC 204508 / S288c) GN=ARO4 PE=1 SV=2	66.116	true	2	39749	1	1	1	1	1	1	1	997475	997475
76767	CBS_YEAST	CYS4	sp|P32582|CBS_YEAST Cystathionine beta-synthase OS=Saccharomyces cerevisiae (strain ATCC 204508 / S288c) GN=CYS4 PE=1 SV=1	91.331	true	2	56022	3	3	3	3	3	3	3	996382	996382
76768	EF2_YEAST	EFT1	sp|P32324|EF2_YEAST Elongation factor 2 OS=Saccharomyces cerevisiae (strain ATCC 204508 / S288c) GN=EFT1 PE=1 SV=1	747.219	true	2	93289	22	22	25	25	21	21	24	27477636	27477636
76769	ADT3_YEAST	AAC3	sp|P18238|ADT3_YEAST ADP,ATP carrier protein 3 OS=Saccharomyces cerevisiae (strain ATCC 204508 / S288c) GN=AAC3 PE=1 SV=1	46.45	true	2	33313	2	1	2	1	2	2	2	1.81826e+06	1.81826e+06
76770	ADT1_YEAST	AAC1	sp|P04710|ADT1_YEAST ADP,ATP carrier protein 1 OS=Saccharomyces cerevisiae (strain ATCC 204508 / S288c) GN=AAC1 PE=1 SV=1	43.9	true	2	34121	2	1	2	1	2	2	2	1.91114e+06	1.91114e+06
76771	ADT2_YEAST	PET9	sp|P18239|ADT2_YEAST ADP,ATP carrier protein 2 OS=Saccharomyces cerevisiae (strain ATCC 204508 / S288c) GN=PET9 PE=1 SV=2	159.928	true	2	34426	6	5	9	8	6	6	9	5.40493e+06	5.40493e+06
76772	TCB1_YEAST	TCB1	sp|Q12466|TCB1_YEAST Tricalbin-1 OS=Saccharomyces cerevisiae (strain ATCC 204508 / S288c) GN=TCB1 PE=1 SV=1	28.733	true	2	133576	1	1	1	1	1	1	1	417830	417830
76773	EBP2_YEAST	EBP2	sp|P36049|EBP2_YEAST rRNA-processing protein EBP2 OS=Saccharomyces cerevisiae (strain ATCC 204508 / S288c) GN=EBP2 PE=1 SV=1	178.091	true	2	49734	4	4	4	4	4	4	4	2.79546e+06	2.79546e+06
76774	RS9B_YEAST	RPS9B	sp|P05755|RS9B_YEAST 40S ribosomal protein S9-B OS=Saccharomyces cerevisiae (strain ATCC 204508 / S288c) GN=RPS9B PE=1 SV=4	133.446	true	2	22299	7	7	7	7	7	7	7	4207612	4207612
76775	EIF3C_YEAS7	NIP1	sp|A6ZN26|EIF3C_YEAS7 Eukaryotic translation initiation factor 3 subunit C OS=Saccharomyces cerevisiae (strain YJM789) GN=NIP1 PE=3 SV=1	56.328	true	2	93220	1	1	2	2	1	1	1	4.40399e+06	4.40399e+06
76776	DBP5_YEAS7	DBP5	sp|A6ZNQ1|DBP5_YEAS7 ATP-dependent RNA helicase DBP5 OS=Saccharomyces cerevisiae (strain YJM789) GN=DBP5 PE=3 SV=1	129.366	true	2	53874	3	3	3	3	3	3	3	1648345	1648345
76777	PLB2_YEAST	PLB2	sp|Q03674|PLB2_YEAST Lysophospholipase 2 OS=Saccharomyces cerevisiae (strain ATCC 204508 / S288c) GN=PLB2 PE=1 SV=1	135.535	true	2	75455	3	3	4	4	3	3	3	8341573	8341573
76778	CBF1_YEAST	CBF1	sp|P17106|CBF1_YEAST Centromere-binding protein 1 OS=Saccharomyces cerevisiae (strain ATCC 204508 / S288c) GN=CBF1 PE=1 SV=2	75.537	true	2	39388	1	1	1	1	1	1	1	425209	425209
76779	ATPG_YEAST	ATP3	sp|P38077|ATPG_YEAST ATP synthase subunit gamma, mitochondrial OS=Saccharomyces cerevisiae (strain ATCC 204508 / S288c) GN=ATP3 PE=1 SV=1	54.65	true	2	34351	1	1	1	1	1	1	1	956144	956144
76780	CRP1_YEAS1	CRP1	sp|B3LSR0|CRP1_YEAS1 Cruciform DNA-recognizing protein 1 OS=Saccharomyces cerevisiae (strain RM11-1a) GN=CRP1 PE=3 SV=1	270.749	true	2	51106	7	7	8	8	7	7	8	6421056	6421056
76781	KAPR_YEAST	BCY1	sp|P07278|KAPR_YEAST cAMP-dependent protein kinase regulatory subunit OS=Saccharomyces cerevisiae (strain ATCC 204508 / S288c) GN=BCY1 PE=1 SV=4	228.705	true	2	47219	7	7	7	7	7	7	7	7736041	7736041
76782	SUB2_YEAS7	SUB2	sp|A6ZXP4|SUB2_YEAS7 ATP-dependent RNA helicase SUB2 OS=Saccharomyces cerevisiae (strain YJM789) GN=SUB2 PE=3 SV=1	22.182	true	2	50279	2	2	2	2	2	2	2	308466	308466
76783	ABF2_YEAST	ABF2	sp|Q02486|ABF2_YEAST ARS-binding factor 2, mitochondrial OS=Saccharomyces cerevisiae (strain ATCC 204508 / S288c) GN=ABF2 PE=1 SV=1	278.375	true	2	21562	13	13	17	17	13	13	14	22037870	22037870
76784	YP260_YEAST	YPL260W	sp|Q08977|YP260_YEAST UPF0662 protein YPL260W OS=Saccharomyces cerevisiae (strain ATCC 204508 / S288c) GN=YPL260W PE=1 SV=1	161.305	true	2	62780	8	8	8	8	8	8	8	3.87089e+06	3.87089e+06
76785	STF1_YEAST	STF1	sp|P01098|STF1_YEAST ATPase-stabilizing factor 9 kDa, mitochondrial OS=Saccharomyces cerevisiae (strain ATCC 204508 / S288c) GN=STF1 PE=1 SV=2	39.322	true	2	10062	2	2	3	3	2	2	3	10826958	10826958
76786	MSC1_YEAST	MSC1	sp|Q03104|MSC1_YEAST Meiotic sister chromatid recombination protein 1 OS=Saccharomyces cerevisiae (strain ATCC 204508 / S288c) GN=MSC1 PE=1 SV=1	717.283	true	2	59589	16	16	25	25	16	16	22	62438524	62438524
76787	NCE2_YEAST	NCE102	sp|Q12207|NCE2_YEAST Non-classical export protein 2 OS=Saccharomyces cerevisiae (strain ATCC 204508 / S288c) GN=NCE102 PE=1 SV=1	14.056	true	2	18967	1	1	1	1	1	1	1	4.57737e+06	4.57737e+06
76788	YG169_YEAST	YGR169C-A	sp|Q3E772|YG169_YEAST Uncharacterized protein YGR169C-A OS=Saccharomyces cerevisiae (strain ATCC 204508 / S288c) GN=YGR169C-A PE=4 SV=1	130.042	true	2	10495	3	3	4	4	3	3	4	2835916	2835916
76789	SYP1_YEAST	SYP1	sp|P25623|SYP1_YEAST Suppressor of yeast profilin deletion OS=Saccharomyces cerevisiae (strain ATCC 204508 / S288c) GN=SYP1 PE=1 SV=3	84.07	true	2	96137	3	3	3	3	3	3	3	1.9244e+06	1.9244e+06
76790	SIS1_YEAST	SIS1	sp|P25294|SIS1_YEAST Protein SIS1 OS=Saccharomyces cerevisiae (strain ATCC 204508 / S288c) GN=SIS1 PE=1 SV=1	479.302	true	2	37590	14	14	23	23	13	13	18	42355380	42355380
76791	RL43A_YEAST	RPL43A	sp|P0CX25|RL43A_YEAST 60S ribosomal protein L43-A OS=Saccharomyces cerevisiae (strain ATCC 204508 / S288c) GN=RPL43A PE=1 SV=1	198.88	true	2	10091	5	5	7	7	5	5	5	9777650	9777650
76792	ODPB_YEAST	PDB1	sp|P32473|ODPB_YEAST Pyruvate dehydrogenase E1 component subunit beta, mitochondrial OS=Saccharomyces cerevisiae (strain ATCC 204508 / S288c) GN=PDB1 PE=1 SV=2	49.906	true	2	40054	2	2	2	2	2	2	2	994924	994924
76793	PET10_YEAST	PET10	sp|P36139|PET10_YEAST Protein PET10 OS=Saccharomyces cerevisiae (strain ATCC 204508 / S288c) GN=PET10 PE=1 SV=3	208.906	true	2	31246	7	7	7	7	7	7	7	8469474	8469474
76794	EF3A_YEAST	YEF3	sp|P16521|EF3A_YEAST Elongation factor 3A OS=Saccharomyces cerevisiae (strain ATCC 204508 / S288c) GN=YEF3 PE=1 SV=4	425.518	true	2	115945	13	13	15	15	13	13	15	20483186	20483186
76795	RLA2_YEAST	RPP2A	sp|P05319|RLA2_YEAST 60S acidic ribosomal protein P2-alpha OS=Saccharomyces cerevisiae (strain ATCC 204508 / S288c) GN=RPP2A PE=1 SV=1	60.481	true	2	10746	2	2	2	2	2	2	2	3.5097e+06	3.5097e+06
76796	COA6_YEAST	COA6	sp|Q3E846|COA6_YEAST Cytochrome c oxidase assembly factor 6 OS=Saccharomyces cerevisiae (strain ATCC 204508 / S288c) GN=COA6 PE=1 SV=1	33.547	true	2	12445	1	1	2	2	1	1	1	524687	524687
76797	RL23A_YEAST	RPL23A	sp|P0CX41|RL23A_YEAST 60S ribosomal protein L23-A OS=Saccharomyces cerevisiae (strain ATCC 204508 / S288c) GN=RPL23A PE=1 SV=1	158.173	true	2	14473	3	3	4	4	2	2	2	4920784	4920784
76798	YME1_YEAST	YME1	sp|P32795|YME1_YEAST Mitochondrial inner membrane i-AAA protease supercomplex subunit YME1 OS=Saccharomyces cerevisiae (strain ATCC 204508 / S288c) GN=YME1 PE=1 SV=1	26.947	true	2	81772	1	1	1	1	1	1	1	177654	177654
76799	KAD2_YEAS1	ADK1	sp|B3LG61|KAD2_YEAS1 Adenylate kinase OS=Saccharomyces cerevisiae (strain RM11-1a) GN=ADK1 PE=3 SV=1	306.139	true	2	24255	9	9	17	17	9	9	12	36836624	36836624
76800	SEC65_YEAST	SEC65	sp|P29478|SEC65_YEAST Signal recognition particle subunit SEC65 OS=Saccharomyces cerevisiae (strain ATCC 204508 / S288c) GN=SEC65 PE=1 SV=1	117.731	true	2	31170	4	4	4	4	4	4	4	3.52349e+06	3.52349e+06
76801	RRF1_YEAST	RRF1	sp|P38771|RRF1_YEAST Ribosome-recycling factor, mitochondrial OS=Saccharomyces cerevisiae (strain ATCC 204508 / S288c) GN=RRF1 PE=1 SV=1	109.618	true	2	26407	4	4	4	4	4	4	4	3.21315e+06	3.21315e+06
76802	SUR7_YEAST	SUR7	sp|P54003|SUR7_YEAST Protein SUR7 OS=Saccharomyces cerevisiae (strain ATCC 204508 / S288c) GN=SUR7 PE=1 SV=1	50.572	true	2	33830	1	1	1	1	1	1	1	704980	704980
76803	SNU13_YEAST	SNU13	sp|P39990|SNU13_YEAST 13 kDa ribonucleoprotein-associated protein OS=Saccharomyces cerevisiae (strain ATCC 204508 / S288c) GN=SNU13 PE=1 SV=1	223.503	true	2	13569	4	4	7	7	4	4	4	10643898	10643898
76804	ETT1_YEAS1	ETT1	sp|B3LJA2|ETT1_YEAS1 Enhancer of translation termination 1 OS=Saccharomyces cerevisiae (strain RM11-1a) GN=ETT1 PE=3 SV=1	14.727	true	2	47468	1	1	1	1	1	1	1	326156	326156
76805	MIA40_YEAST	MIA40	sp|P36046|MIA40_YEAST Mitochondrial intermembrane space import and assembly protein 40 OS=Saccharomyces cerevisiae (strain ATCC 204508 / S288c) GN=MIA40 PE=1 SV=2	201.138	true	2	44536	7	7	10	10	7	7	9	13090212	13090212
76806	DNM1_YEAST	DNM1	sp|P54861|DNM1_YEAST Dynamin-related protein DNM1 OS=Saccharomyces cerevisiae (strain ATCC 204508 / S288c) GN=DNM1 PE=1 SV=1	33.032	true	2	84972	1	1	1	1	1	1	1	205518	205518
76807	PURA_YEAS1	ADE12	sp|B3LP64|PURA_YEAS1 Adenylosuccinate synthetase OS=Saccharomyces cerevisiae (strain RM11-1a) GN=ADE12 PE=3 SV=1	12.538	true	2	48262	1	1	1	1	1	1	1	244501	244501
76808	DED1_YEAS7	DED1	sp|A6ZP47|DED1_YEAS7 ATP-dependent RNA helicase DED1 OS=Saccharomyces cerevisiae (strain YJM789) GN=DED1 PE=3 SV=1	22.278	true	2	65553	1	1	1	1	1	1	1	417707	417707
76809	CLU_YEAST	CLU1	sp|Q03690|CLU_YEAST Clustered mitochondria protein 1 OS=Saccharomyces cerevisiae (strain ATCC 204508 / S288c) GN=CLU1 PE=1 SV=1	17.928	true	2	145166	1	1	1	1	1	1	1	267802	267802
76810	YRA1_YEAST	YRA1	sp|Q12159|YRA1_YEAST RNA annealing protein YRA1 OS=Saccharomyces cerevisiae (strain ATCC 204508 / S288c) GN=YRA1 PE=1 SV=2	258.079	true	2	24956	8	8	12	12	8	8	10	49092988	49092988
76811	RS13_YEAST	RPS13	sp|P05756|RS13_YEAST 40S ribosomal protein S13 OS=Saccharomyces cerevisiae (strain ATCC 204508 / S288c) GN=RPS13 PE=1 SV=3	15.319	true	2	17029	1	1	1	1	1	1	1	684432	684432
76812	UBC4_YEAST	UBC4	sp|P15731|UBC4_YEAST Ubiquitin-conjugating enzyme E2 4 OS=Saccharomyces cerevisiae (strain ATCC 204508 / S288c) GN=UBC4 PE=1 SV=1	38.375	true	2	16456	1	1	1	1	1	1	1	1.05159e+06	1.05159e+06
76815	DBP3_YEAS7	DBP3	sp|A6ZUA1|DBP3_YEAS7 ATP-dependent RNA helicase DBP3 OS=Saccharomyces cerevisiae (strain YJM789) GN=DBP3 PE=3 SV=1	17.019	true	2	58850	1	1	1	1	1	1	1	904585	904585
76816	SIP18_YEAST	SIP18	sp|P50263|SIP18_YEAST Protein SIP18 OS=Saccharomyces cerevisiae (strain ATCC 204508 / S288c) GN=SIP18 PE=1 SV=1	243.943	true	2	8874	10	10	15	15	10	10	12	53284308	53284308
76817	ERG28_YEAST	ERG28	sp|P40030|ERG28_YEAST Ergosterol biosynthetic protein 28 OS=Saccharomyces cerevisiae (strain ATCC 204508 / S288c) GN=ERG28 PE=1 SV=1	17.872	true	2	17135	1	1	1	1	1	1	1	957303	957303
76818	CYPC_YEAST	CPR3	sp|P25719|CYPC_YEAST Peptidyl-prolyl cis-trans isomerase C, mitochondrial OS=Saccharomyces cerevisiae (strain ATCC 204508 / S288c) GN=CPR3 PE=1 SV=1	150.06	true	2	19919	5	5	5	5	5	5	5	9834470	9834470
76819	IES4_YEAST	IES4	sp|Q08561|IES4_YEAST Ino eighty subunit 4 OS=Saccharomyces cerevisiae (strain ATCC 204508 / S288c) GN=IES4 PE=1 SV=1	18.653	true	2	13092	2	2	2	2	2	2	2	513449	513449
76820	YC075_YEAST	YCR075W-A	sp|Q3E830|YC075_YEAST Uncharacterized protein YCR075W-A OS=Saccharomyces cerevisiae (strain ATCC 204508 / S288c) GN=YCR075W-A PE=1 SV=1	17.445	true	2	8097	1	1	1	1	1	1	1	413953	413953
76821	MHP1_YEAST	MHP1	sp|P43638|MHP1_YEAST MAP-homologous protein 1 OS=Saccharomyces cerevisiae (strain ATCC 204508 / S288c) GN=MHP1 PE=1 SV=1	68.781	true	2	155207	2	2	2	2	2	2	2	1.51013e+06	1.51013e+06
76822	FKBP_YEAST	FPR1	sp|P20081|FKBP_YEAST FK506-binding protein 1 OS=Saccharomyces cerevisiae (strain ATCC 204508 / S288c) GN=FPR1 PE=1 SV=2	220.03	true	2	12158	7	7	10	10	6	6	9	60980432	60980432
76823	AIM3_YEAS1	AIM3	sp|B3LN45|AIM3_YEAS1 Altered inheritance of mitochondria protein 3 OS=Saccharomyces cerevisiae (strain RM11-1a) GN=AIM3 PE=3 SV=1	99.797	true	2	102618	3	3	3	3	3	3	3	767329	767329
76824	RL19A_YEAST	RPL19A	sp|P0CX82|RL19A_YEAST 60S ribosomal protein L19-A OS=Saccharomyces cerevisiae (strain ATCC 204508 / S288c) GN=RPL19A PE=1 SV=1	285.812	true	2	21704	9	9	15	15	9	9	12	26495992	26495992
76825	CWC26_YEAST	BUD13	sp|P46947|CWC26_YEAST Pre-mRNA-splicing factor CWC26 OS=Saccharomyces cerevisiae (strain ATCC 204508 / S288c) GN=BUD13 PE=1 SV=1	46.84	true	2	30472	1	1	1	1	1	1	1	563621	563621
76826	TOM70_YEAS7	TOM70	sp|A6ZRW3|TOM70_YEAS7 Mitochondrial import receptor subunit TOM70 OS=Saccharomyces cerevisiae (strain YJM789) GN=TOM70 PE=3 SV=1	72.678	true	2	70123	5	5	5	5	5	5	5	2691133	2691133
76827	NET1_YEAST	NET1	sp|P47035|NET1_YEAST Nucleolar protein NET1 OS=Saccharomyces cerevisiae (strain ATCC 204508 / S288c) GN=NET1 PE=1 SV=1	71.906	true	2	128531	3	3	3	3	3	3	3	781828	781828
76828	SUM1_YEAST	SUM1	sp|P46676|SUM1_YEAST Suppressor of mar1-1 protein OS=Saccharomyces cerevisiae (strain ATCC 204508 / S288c) GN=SUM1 PE=1 SV=2	36.372	true	2	118201	2	2	2	2	2	2	2	389886	389886
76829	UBC1_YEAST	UBC1	sp|P21734|UBC1_YEAST Ubiquitin-conjugating enzyme E2 1 OS=Saccharomyces cerevisiae (strain ATCC 204508 / S288c) GN=UBC1 PE=1 SV=1	46.816	true	2	24178	2	2	2	2	2	2	2	874296	874296
76830	SYLC_YEAST	CDC60	sp|P26637|SYLC_YEAST Leucine--tRNA ligase, cytoplasmic OS=Saccharomyces cerevisiae (strain ATCC 204508 / S288c) GN=CDC60 PE=1 SV=1	42.028	true	2	124142	2	1	3	1	2	2	3	10061531	10061531
76831	ATPD_YEAST	ATP16	sp|Q12165|ATPD_YEAST ATP synthase subunit delta, mitochondrial OS=Saccharomyces cerevisiae (strain ATCC 204508 / S288c) GN=ATP16 PE=1 SV=1	283.454	true	2	17020	5	4	11	9	5	5	8	54595492	54595492
76832	ARGJ_YEAS1	ARG7	sp|B3LLV5|ARGJ_YEAS1 Arginine biosynthesis bifunctional protein ArgJ, mitochondrial OS=Saccharomyces cerevisiae (strain RM11-1a) GN=ARG7 PE=3 SV=1	18.005	true	2	47849	1	1	1	1	1	1	1	237908	237908
76833	TRP_YEAST	TRP5	sp|P00931|TRP_YEAST Tryptophan synthase OS=Saccharomyces cerevisiae (strain ATCC 204508 / S288c) GN=TRP5 PE=1 SV=1	10.916	true	2	76626	1	1	1	1	1	1	1	202526	202526
76834	SDS23_YEAS7	SDS23	sp|A6ZUC0|SDS23_YEAS7 Protein SDS23 OS=Saccharomyces cerevisiae (strain YJM789) GN=SDS23 PE=3 SV=1	82.325	true	2	58098	1	1	1	1	1	1	1	264644	264644
76835	SUI1_YEAST	SUI1	sp|P32911|SUI1_YEAST Eukaryotic translation initiation factor eIF-1 OS=Saccharomyces cerevisiae (strain ATCC 204508 / S288c) GN=SUI1 PE=1 SV=1	134.807	true	2	12312	4	4	6	6	4	4	5	9747236	9747236
76836	YD121_YEAST	YDL121C	sp|Q07541|YD121_YEAST Uncharacterized protein YDL121C OS=Saccharomyces cerevisiae (strain ATCC 204508 / S288c) GN=YDL121C PE=1 SV=1	22.915	true	2	16947	1	1	1	1	1	1	1	346286	346286
76837	NDI1_YEAST	NDI1	sp|P32340|NDI1_YEAST Rotenone-insensitive NADH-ubiquinone oxidoreductase, mitochondrial OS=Saccharomyces cerevisiae (strain ATCC 204508 / S288c) GN=NDI1 PE=1 SV=1	77.522	true	2	57250	3	3	3	3	3	3	3	588784	588784
76838	BFR1_YEAST	BFR1	sp|P38934|BFR1_YEAST Nuclear segregation protein BFR1 OS=Saccharomyces cerevisiae (strain ATCC 204508 / S288c) GN=BFR1 PE=1 SV=1	914.224	true	2	54639	28	28	36	36	28	28	33	54917352	54917352
76839	YM8V_YEAST	YMR295C	sp|Q03559|YM8V_YEAST Uncharacterized protein YMR295C OS=Saccharomyces cerevisiae (strain ATCC 204508 / S288c) GN=YMR295C PE=1 SV=1	48.593	true	2	22179	1	1	1	1	1	1	1	1.16922e+06	1.16922e+06
76840	EFG1P_YEAS7	EFG1	sp|A6ZUS8|EFG1P_YEAS7 rRNA-processing protein EFG1 OS=Saccharomyces cerevisiae (strain YJM789) GN=EFG1 PE=3 SV=1	11.28	true	2	27121	1	1	1	1	1	1	1	170006	170006
76841	MPCP_YEAST	MIR1	sp|P23641|MPCP_YEAST Mitochondrial phosphate carrier protein OS=Saccharomyces cerevisiae (strain ATCC 204508 / S288c) GN=MIR1 PE=1 SV=1	73.767	true	2	32812	2	2	2	2	1	1	1	1.12413e+06	1.12413e+06
76842	GCS1_YEAST	GCS1	sp|P35197|GCS1_YEAST ADP-ribosylation factor GTPase-activating protein GCS1 OS=Saccharomyces cerevisiae (strain ATCC 204508 / S288c) GN=GCS1 PE=1 SV=1	17.009	true	2	39296	1	1	1	1	1	1	1	610418	610418
76843	CYC1_YEAST	CYC1	sp|P00044|CYC1_YEAST Cytochrome c iso-1 OS=Saccharomyces cerevisiae (strain ATCC 204508 / S288c) GN=CYC1 PE=1 SV=2	324.751	true	2	12182	10	7	25	18	10	10	18	79453944	79453944
76844	CYC7_YEAST	CYC7	sp|P00045|CYC7_YEAST Cytochrome c iso-2 OS=Saccharomyces cerevisiae (strain ATCC 204508 / S288c) GN=CYC7 PE=1 SV=1	216.696	true	2	12532	7	4	12	5	7	7	10	37872412	37872412
76845	RL36B_YEAST	RPL36B	sp|O14455|RL36B_YEAST 60S ribosomal protein L36-B OS=Saccharomyces cerevisiae (strain ATCC 204508 / S288c) GN=RPL36B PE=1 SV=3	388.915	true	2	11135	8	2	17	4	8	8	14	145229504	145229504
76846	RL36A_YEAST	RPL36A	sp|P05745|RL36A_YEAST 60S ribosomal protein L36-A OS=Saccharomyces cerevisiae (strain ATCC 204508 / S288c) GN=RPL36A PE=1 SV=3	365.218	true	2	11124	8	2	17	4	8	8	14	118610544	118610544
76847	MDG1_YEAS1	MDG1	sp|B3LP25|MDG1_YEAS1 Signal transduction protein MDG1 OS=Saccharomyces cerevisiae (strain RM11-1a) GN=MDG1 PE=3 SV=1	266.654	true	2	40278	8	8	9	9	8	8	8	8624465	8624465
76849	SEC16_YEAST	SEC16	sp|P48415|SEC16_YEAST COPII coat assembly protein SEC16 OS=Saccharomyces cerevisiae (strain ATCC 204508 / S288c) GN=SEC16 PE=1 SV=2	13.006	true	2	241696	1	1	1	1	1	1	1	479776	479776
76850	KCC2_YEAST	CMK2	sp|P22517|KCC2_YEAST Calcium/calmodulin-dependent protein kinase II OS=Saccharomyces cerevisiae (strain ATCC 204508 / S288c) GN=CMK2 PE=1 SV=2	13.079	true	2	50447	1	1	1	1	1	1	1	191866	191866
76851	H2AZ_YEAST	HTZ1	sp|Q12692|H2AZ_YEAST Histone H2A.Z OS=Saccharomyces cerevisiae (strain ATCC 204508 / S288c) GN=HTZ1 PE=1 SV=3	58.396	true	2	14283	2	1	4	1	2	2	4	19352090	19352090
76852	H2A1_YEAST	HTA1	sp|P04911|H2A1_YEAST Histone H2A.1 OS=Saccharomyces cerevisiae (strain ATCC 204508 / S288c) GN=HTA1 PE=1 SV=2	104.432	true	2	13989	3	2	6	3	3	3	6	52495540	52495540
76853	HAL5_YEAST	HAL5	sp|P38970|HAL5_YEAST Serine/threonine-protein kinase HAL5 OS=Saccharomyces cerevisiae (strain ATCC 204508 / S288c) GN=HAL5 PE=1 SV=2	37.075	true	2	95455	2	2	2	2	2	2	2	822673	822673
76854	RS26A_YEAST	RPS26A	sp|P39938|RS26A_YEAST 40S ribosomal protein S26-A OS=Saccharomyces cerevisiae (strain ATCC 204508 / S288c) GN=RPS26A PE=1 SV=1	34.308	true	2	13505	2	2	2	2	2	2	2	7.07042e+06	7.07042e+06
76855	KRR1_YEAS1	KRR1	sp|B3LU25|KRR1_YEAS1 KRR1 small subunit processome component OS=Saccharomyces cerevisiae (strain RM11-1a) GN=KRR1 PE=3 SV=1	12.378	true	2	37159	1	1	1	1	1	1	1	383794	383794
76856	PAL1_YEAST	PAL1	sp|Q05518|PAL1_YEAST Protein PAL1 OS=Saccharomyces cerevisiae (strain ATCC 204508 / S288c) GN=PAL1 PE=1 SV=1	184.994	true	2	54996	4	4	4	4	4	4	4	1.45353e+06	1.45353e+06
76857	RL15A_YEAST	RPL15A	sp|P05748|RL15A_YEAST 60S ribosomal protein L15-A OS=Saccharomyces cerevisiae (strain ATCC 204508 / S288c) GN=RPL15A PE=1 SV=3	171.744	true	2	24422	5	5	5	5	5	5	5	3814396	3814396
76858	DLDH_YEAST	LPD1	sp|P09624|DLDH_YEAST Dihydrolipoyl dehydrogenase, mitochondrial OS=Saccharomyces cerevisiae (strain ATCC 204508 / S288c) GN=LPD1 PE=1 SV=1	63.535	true	2	54010	3	3	3	3	2	2	2	724236	724236
76859	MZM1_YEAS1	MZM1	sp|B3LFH4|MZM1_YEAS1 Mitochondrial zinc maintenance protein 1, mitochondrial OS=Saccharomyces cerevisiae (strain RM11-1a) GN=MZM1 PE=3 SV=1	22.137	true	2	13927	1	1	1	1	1	1	1	884331	884331
76860	GSP1_YEAST	GSP1	sp|P32835|GSP1_YEAST GTP-binding nuclear protein GSP1/CNR1 OS=Saccharomyces cerevisiae (strain ATCC 204508 / S288c) GN=GSP1 PE=1 SV=1	20.15	true	2	24810	1	1	1	1	1	1	1	713880	713880
76863	ATPN_YEAST	ATP20	sp|Q12233|ATPN_YEAST ATP synthase subunit g, mitochondrial OS=Saccharomyces cerevisiae (strain ATCC 204508 / S288c) GN=ATP20 PE=1 SV=1	76.449	true	2	12921	4	4	4	4	4	4	4	4.49126e+06	4.49126e+06
76864	UCRI_YEAST	RIP1	sp|P08067|UCRI_YEAST Cytochrome b-c1 complex subunit Rieske, mitochondrial OS=Saccharomyces cerevisiae (strain ATCC 204508 / S288c) GN=RIP1 PE=1 SV=1	38.778	true	2	23365	1	1	1	1	1	1	1	408418	408418
76865	IF4E_YEAST	CDC33	sp|P07260|IF4E_YEAST Eukaryotic translation initiation factor 4E OS=Saccharomyces cerevisiae (strain ATCC 204508 / S288c) GN=CDC33 PE=1 SV=1	172.797	true	2	24254	5	5	8	8	5	5	6	7.64096e+06	7.64096e+06
76866	SKP1_YEAST	SKP1	sp|P52286|SKP1_YEAST Suppressor of kinetochore protein 1 OS=Saccharomyces cerevisiae (strain ATCC 204508 / S288c) GN=SKP1 PE=1 SV=2	149.39	true	2	22330	5	5	5	5	5	5	5	2.99661e+06	2.99661e+06
76867	RL7A_YEAST	RPL7A	sp|P05737|RL7A_YEAST 60S ribosomal protein L7-A OS=Saccharomyces cerevisiae (strain ATCC 204508 / S288c) GN=RPL7A PE=1 SV=3	96.79	true	2	27638	5	5	5	5	5	5	5	3937678	3937678
76868	MCR1_YEAS7	MCR1	sp|A6ZZH2|MCR1_YEAS7 NADH-cytochrome b5 reductase 2 OS=Saccharomyces cerevisiae (strain YJM789) GN=MCR1 PE=3 SV=1	46.461	true	2	34108	2	2	2	2	2	2	2	1.26321e+06	1.26321e+06
76871	GRP78_YEAST	KAR2	sp|P16474|GRP78_YEAST 78 kDa glucose-regulated protein homolog OS=Saccharomyces cerevisiae (strain ATCC 204508 / S288c) GN=KAR2 PE=1 SV=1	219.495	true	2	74468	6	5	6	5	6	6	6	5.73093e+06	5.73093e+06
76873	SPT5_YEAST	SPT5	sp|P27692|SPT5_YEAST Transcription elongation factor SPT5 OS=Saccharomyces cerevisiae (strain ATCC 204508 / S288c) GN=SPT5 PE=1 SV=1	142.707	true	2	115650	4	4	4	4	4	4	4	2338129	2338129
76874	SGN1_YEAST	SGN1	sp|P40561|SGN1_YEAST RNA-binding protein SGN1 OS=Saccharomyces cerevisiae (strain ATCC 204508 / S288c) GN=SGN1 PE=1 SV=1	36.567	true	2	28954	2	2	2	2	2	2	2	1.20579e+06	1.20579e+06
76875	RCK2_YEAST	RCK2	sp|P38623|RCK2_YEAST Serine/threonine-protein kinase RCK2 OS=Saccharomyces cerevisiae (strain ATCC 204508 / S288c) GN=RCK2 PE=1 SV=3	33.912	true	2	68062	1	1	1	1	1	1	1	298330	298330
76876	PRTB_YEAST	PRB1	sp|P09232|PRTB_YEAST Cerevisin OS=Saccharomyces cerevisiae (strain ATCC 204508 / S288c) GN=PRB1 PE=1 SV=1	137.943	true	2	69621	5	5	5	5	5	5	5	3271341	3271341
76877	RPAB2_YEAST	RPO26	sp|P20435|RPAB2_YEAST DNA-directed RNA polymerases I, II, and III subunit RPABC2 OS=Saccharomyces cerevisiae (strain ATCC 204508 / S288c) GN=RPO26 PE=1 SV=1	80.361	true	2	17910	3	3	3	3	3	3	3	4.11887e+06	4.11887e+06
76878	RS10A_YEAST	RPS10A	sp|Q08745|RS10A_YEAST 40S ribosomal protein S10-A OS=Saccharomyces cerevisiae (strain ATCC 204508 / S288c) GN=RPS10A PE=1 SV=1	34.681	true	2	12739	1	1	1	1	1	1	1	1.03537e+06	1.03537e+06
76879	BBC1_YEAST	BBC1	sp|P47068|BBC1_YEAST Myosin tail region-interacting protein MTI1 OS=Saccharomyces cerevisiae (strain ATCC 204508 / S288c) GN=BBC1 PE=1 SV=2	233.19	true	2	128297	8	8	8	8	8	8	8	7545314	7545314
76880	RL35A_YEAST	RPL35A	sp|P0CX84|RL35A_YEAST 60S ribosomal protein L35-A OS=Saccharomyces cerevisiae (strain ATCC 204508 / S288c) GN=RPL35A PE=1 SV=1	189.93	true	2	13910	6	6	10	10	6	6	7	31732072	31732072
76881	SYNC_YEAST	DED81	sp|P38707|SYNC_YEAST Asparagine--tRNA ligase, cytoplasmic OS=Saccharomyces cerevisiae (strain ATCC 204508 / S288c) GN=DED81 PE=1 SV=1	32.947	true	2	62207	1	1	1	1	1	1	1	265047	265047
76882	YP199_YEAST	YPL199C	sp|Q08954|YP199_YEAST Smr domain-containing protein YPL199C OS=Saccharomyces cerevisiae (strain ATCC 204508 / S288c) GN=YPL199C PE=1 SV=1	74.049	true	2	26758	4	4	4	4	4	4	4	1.56662e+06	1.56662e+06
76883	QCR7_YEAST	QCR7	sp|P00128|QCR7_YEAST Cytochrome b-c1 complex subunit 7 OS=Saccharomyces cerevisiae (strain ATCC 204508 / S288c) GN=QCR7 PE=1 SV=2	151.214	true	2	14565	5	5	6	6	5	5	6	7.82297e+06	7.82297e+06
76884	PIN3_YEAST	PIN3	sp|Q06449|PIN3_YEAST [PSI+] inducibility protein 3 OS=Saccharomyces cerevisiae (strain ATCC 204508 / S288c) GN=PIN3 PE=1 SV=1	85.678	true	2	23539	3	3	3	3	3	3	3	2.47535e+06	2.47535e+06
76887	HSP7E_YEAST	ECM10	sp|P39987|HSP7E_YEAST Heat shock protein SSC3, mitochondrial OS=Saccharomyces cerevisiae (strain ATCC 204508 / S288c) GN=ECM10 PE=3 SV=1	81.943	true	2	70084	3	1	3	1	3	3	3	3.94772e+06	3.94772e+06
76888	RSSA1_YEAS1	RPS0A	sp|B3LI22|RSSA1_YEAS1 40S ribosomal protein S0-A OS=Saccharomyces cerevisiae (strain RM11-1a) GN=RPS0A PE=3 SV=1	90.809	true	2	28024	4	4	5	5	4	4	4	3.32554e+06	3.32554e+06
76889	RL30_YEAST	RPL30	sp|P14120|RL30_YEAST 60S ribosomal protein L30 OS=Saccharomyces cerevisiae (strain ATCC 204508 / S288c) GN=RPL30 PE=1 SV=3	151.913	true	2	11415	4	4	4	4	4	4	4	2.80368e+06	2.80368e+06
76890	H2B1_YEAST	HTB1	sp|P02293|H2B1_YEAST Histone H2B.1 OS=Saccharomyces cerevisiae (strain ATCC 204508 / S288c) GN=HTB1 PE=1 SV=2	262.17	true	2	14252	4	4	14	14	4	4	12	89718864	89718864
76891	RL6A_YEAST	RPL6A	sp|Q02326|RL6A_YEAST 60S ribosomal protein L6-A OS=Saccharomyces cerevisiae (strain ATCC 204508 / S288c) GN=RPL6A PE=1 SV=2	67.19	true	2	19961	2	1	2	1	2	2	2	1.44572e+06	1.44572e+06
76892	RL6B_YEAST	RPL6B	sp|P05739|RL6B_YEAST 60S ribosomal protein L6-B OS=Saccharomyces cerevisiae (strain ATCC 204508 / S288c) GN=RPL6B PE=1 SV=4	78.471	true	2	19986	3	2	3	2	3	3	3	1.97791e+06	1.97791e+06
76893	YCP4_YEAST	YCP4	sp|P25349|YCP4_YEAST Flavoprotein-like protein YCP4 OS=Saccharomyces cerevisiae (strain ATCC 204508 / S288c) GN=YCP4 PE=1 SV=1	30.828	true	2	26350	1	1	1	1	1	1	1	455168	455168
76894	ABP1_YEAST	ABP1	sp|P15891|ABP1_YEAST Actin-binding protein OS=Saccharomyces cerevisiae (strain ATCC 204508 / S288c) GN=ABP1 PE=1 SV=4	523.48	true	2	65576	16	16	22	22	15	15	18	28388228	28388228
76895	YFI6_YEAST	YFR016C	sp|P43597|YFI6_YEAST Uncharacterized protein YFR016C OS=Saccharomyces cerevisiae (strain ATCC 204508 / S288c) GN=YFR016C PE=1 SV=1	40.14	true	2	137698	2	2	2	2	2	2	2	201216	201216
76896	VTI1_YEAST	VTI1	sp|Q04338|VTI1_YEAST t-SNARE VTI1 OS=Saccharomyces cerevisiae (strain ATCC 204508 / S288c) GN=VTI1 PE=1 SV=3	35.581	true	2	24668	1	1	1	1	1	1	1	175902	175902
76897	RS23A_YEAST	RPS23A	sp|P0CX29|RS23A_YEAST 40S ribosomal protein S23-A OS=Saccharomyces cerevisiae (strain ATCC 204508 / S288c) GN=RPS23A PE=1 SV=1	21.57	true	2	16038	1	1	1	1	1	1	1	1.71096e+06	1.71096e+06
76898	UBC8_YEAST	UBC8	sp|P28263|UBC8_YEAST Ubiquitin-conjugating enzyme E2-24 kDa OS=Saccharomyces cerevisiae (strain ATCC 204508 / S288c) GN=UBC8 PE=1 SV=2	29.487	true	2	24633	1	1	1	1	1	1	1	561480	561480
76899	ODP2_YEAST	LAT1	sp|P12695|ODP2_YEAST Dihydrolipoyllysine-residue acetyltransferase component of pyruvate dehydrogenase complex, mitochondrial OS=Saccharomyces cerevisiae (strain ATCC 204508 / S288c) GN=LAT1 PE=1 SV=1	78.544	true	2	51818	4	4	5	5	4	4	5	1.92935e+06	1.92935e+06
76900	FMP46_YEAST	FMP46	sp|P36141|FMP46_YEAST Putative redox protein FMP46, mitochondrial OS=Saccharomyces cerevisiae (strain ATCC 204508 / S288c) GN=FMP46 PE=1 SV=1	73.188	true	2	15650	2	2	2	2	2	2	2	1.36346e+06	1.36346e+06
76901	RHO3_YEAST	RHO3	sp|Q00245|RHO3_YEAST GTP-binding protein RHO3 OS=Saccharomyces cerevisiae (strain ATCC 204508 / S288c) GN=RHO3 PE=1 SV=2	33.613	true	2	25312	2	2	2	2	2	2	2	327362	327362
76902	RGI1_YEAS1	RGI1	sp|B3LRI4|RGI1_YEAS1 Respiratory growth induced protein 1 OS=Saccharomyces cerevisiae (strain RM11-1a) GN=RGI1 PE=3 SV=1	42.162	true	2	18989	2	2	2	2	2	2	2	497354	497354
76903	PXR1_YEAS7	PXR1	sp|A6ZUT6|PXR1_YEAS7 Protein PXR1 OS=Saccharomyces cerevisiae (strain YJM789) GN=PXR1 PE=3 SV=1	12.416	true	2	31388	1	1	1	1	1	1	1	112602	112602
76904	ACS1_YEAST	ACS1	sp|Q01574|ACS1_YEAST Acetyl-coenzyme A synthetase 1 OS=Saccharomyces cerevisiae (strain ATCC 204508 / S288c) GN=ACS1 PE=1 SV=2	155.833	true	2	79141	8	7	11	10	8	8	10	9387933	9387933
76905	ACS2_YEAST	ACS2	sp|P52910|ACS2_YEAST Acetyl-coenzyme A synthetase 2 OS=Saccharomyces cerevisiae (strain ATCC 204508 / S288c) GN=ACS2 PE=1 SV=1	71.265	true	2	75492	3	2	3	2	3	3	3	1.53453e+06	1.53453e+06
76906	GIP3_YEAST	GIP3	sp|Q03016|GIP3_YEAST GLC7-interacting protein 3 OS=Saccharomyces cerevisiae (strain ATCC 204508 / S288c) GN=GIP3 PE=1 SV=1	26.628	true	2	140891	1	1	1	1	1	1	1	81524.7	81524.7
76907	YPT31_YEAST	YPT31	sp|P38555|YPT31_YEAST GTP-binding protein YPT31/YPT8 OS=Saccharomyces cerevisiae (strain ATCC 204508 / S288c) GN=YPT31 PE=1 SV=3	11.141	true	2	24469	1	1	1	1	1	1	1	157107	157107
76908	BZZ1_YEAST	BZZ1	sp|P38822|BZZ1_YEAST Protein BZZ1 OS=Saccharomyces cerevisiae (strain ATCC 204508 / S288c) GN=BZZ1 PE=1 SV=1	40.24	true	2	71171	1	1	1	1	1	1	1	406317	406317
76909	DID4_YEAST	DID4	sp|P36108|DID4_YEAST DOA4-independent degradation protein 4 OS=Saccharomyces cerevisiae (strain ATCC 204508 / S288c) GN=DID4 PE=1 SV=2	33.988	true	2	26291	2	2	2	2	2	2	2	934386	934386
76910	YG36_YEAST	YGR126W	sp|P53274|YG36_YEAST Uncharacterized protein YGR126W OS=Saccharomyces cerevisiae (strain ATCC 204508 / S288c) GN=YGR126W PE=1 SV=1	20.215	true	2	25846	1	1	1	1	1	1	1	299759	299759
76911	SSD1_YEAST	SSD1	sp|P24276|SSD1_YEAST Protein SSD1 OS=Saccharomyces cerevisiae (strain ATCC 204508 / S288c) GN=SSD1 PE=1 SV=1	88.185	true	2	139954	4	4	4	4	4	4	4	2238654	2238654
76912	IGO2_YEAST	IGO2	sp|Q9P305|IGO2_YEAST mRNA stability protein IGO2 OS=Saccharomyces cerevisiae (strain ATCC 204508 / S288c) GN=IGO2 PE=1 SV=3	72.81	true	2	14395	4	4	4	4	4	4	4	4.12638e+06	4.12638e+06
76913	EF1G2_YEAST	TEF4	sp|P36008|EF1G2_YEAST Elongation factor 1-gamma 2 OS=Saccharomyces cerevisiae (strain ATCC 204508 / S288c) GN=TEF4 PE=1 SV=1	43.029	true	2	46520	3	3	3	3	3	3	3	2164490	2164490
76914	GRE1_YEAST	GRE1	sp|Q08969|GRE1_YEAST Protein GRE1 OS=Saccharomyces cerevisiae (strain ATCC 204508 / S288c) GN=GRE1 PE=1 SV=1	225.297	true	2	19026	5	5	10	10	5	5	7	13553960	13553960
76915	PMA1_YEAST	PMA1	sp|P05030|PMA1_YEAST Plasma membrane ATPase 1 OS=Saccharomyces cerevisiae (strain ATCC 204508 / S288c) GN=PMA1 PE=1 SV=2	577.024	true	2	99619	16	16	18	18	16	16	17	31789710	31789710
76916	SC61G_YEAST	SSS1	sp|P35179|SC61G_YEAST Protein transport protein SSS1 OS=Saccharomyces cerevisiae (strain ATCC 204508 / S288c) GN=SSS1 PE=1 SV=2	58.109	true	2	8944	1	1	1	1	1	1	1	6.05254e+06	6.05254e+06
76917	RL11A_YEAST	RPL11A	sp|P0C0W9|RL11A_YEAST 60S ribosomal protein L11-A OS=Saccharomyces cerevisiae (strain ATCC 204508 / S288c) GN=RPL11A PE=1 SV=2	80.791	true	2	19720	2	2	2	2	2	2	2	1.40467e+06	1.40467e+06
76918	AIM41_YEAS1	AIM41	sp|B3LJN9|AIM41_YEAS1 Altered inheritance of mitochondria protein 41, mitochondrial OS=Saccharomyces cerevisiae (strain RM11-1a) GN=AIM41 PE=3 SV=1	334.531	true	2	21229	11	11	15	15	11	11	14	25651744	25651744
76919	IGD1_YEAST	IGD1	sp|P43598|IGD1_YEAST Inhibitor of glycogen debranching 1 OS=Saccharomyces cerevisiae (strain ATCC 204508 / S288c) GN=IGD1 PE=1 SV=1	201.461	true	2	21783	9	9	11	11	9	9	9	13578681	13578681
76920	AIM9_YEAS1	AIM9	sp|B3LRJ8|AIM9_YEAS1 Altered inheritance of mitochondria protein 9, mitochondrial OS=Saccharomyces cerevisiae (strain RM11-1a) GN=AIM9 PE=3 SV=1	12.491	true	2	72390	1	1	1	1	1	1	1	94581.6	94581.6
76921	DEF1_YEAS2	DEF1	sp|C7GP20|DEF1_YEAS2 RNA polymerase II degradation factor 1 OS=Saccharomyces cerevisiae (strain JAY291) GN=DEF1 PE=3 SV=1	464.341	true	2	83974	12	12	17	17	12	12	15	27573960	27573960
76922	DAP1_YEAST	DAP1	sp|Q12091|DAP1_YEAST Damage response protein 1 OS=Saccharomyces cerevisiae (strain ATCC 204508 / S288c) GN=DAP1 PE=1 SV=1	52.345	true	2	16758	2	2	2	2	2	2	2	1.04291e+06	1.04291e+06
76923	RS19A_YEAST	RPS19A	sp|P07280|RS19A_YEAST 40S ribosomal protein S19-A OS=Saccharomyces cerevisiae (strain ATCC 204508 / S288c) GN=RPS19A PE=1 SV=2	447.782	true	2	15917	11	11	23	23	11	11	20	85937984	85937984
76924	TIM9_YEAST	TIM9	sp|O74700|TIM9_YEAST Mitochondrial import inner membrane translocase subunit TIM9 OS=Saccharomyces cerevisiae (strain ATCC 204508 / S288c) GN=TIM9 PE=1 SV=1	120.006	true	2	10202	4	4	6	6	4	4	6	17869996	17869996
76925	ADY2_YEAST	ADY2	sp|P25613|ADY2_YEAST Accumulation of dyads protein 2 OS=Saccharomyces cerevisiae (strain ATCC 204508 / S288c) GN=ADY2 PE=1 SV=1	26.028	true	2	30726	1	1	1	1	1	1	1	782563	782563
76926	DFM1_YEAST	DFM1	sp|Q12743|DFM1_YEAST DER1-like family member protein 1 OS=Saccharomyces cerevisiae (strain ATCC 204508 / S288c) GN=DFM1 PE=1 SV=1	78.466	true	2	38131	2	2	2	2	2	2	2	497282	497282
76927	DPB4_YEAST	DPB4	sp|Q04603|DPB4_YEAST DNA polymerase epsilon subunit D OS=Saccharomyces cerevisiae (strain ATCC 204508 / S288c) GN=DPB4 PE=1 SV=1	36.391	true	2	21997	2	2	3	3	2	2	2	937135	937135
76928	UTP14_YEAST	UTP14	sp|Q04500|UTP14_YEAST U3 small nucleolar RNA-associated protein 14 OS=Saccharomyces cerevisiae (strain ATCC 204508 / S288c) GN=UTP14 PE=1 SV=1	294.703	true	2	103023	10	10	10	10	10	10	10	4.36929e+06	4.36929e+06
76929	SFC1_YEAST	SFC1	sp|P33303|SFC1_YEAST Succinate/fumarate mitochondrial transporter OS=Saccharomyces cerevisiae (strain ATCC 204508 / S288c) GN=SFC1 PE=1 SV=2	51.628	true	2	35340	3	3	3	3	3	3	3	717310	717310
76930	HBT1_YEAST	HBT1	sp|Q07653|HBT1_YEAST Protein HBT1 OS=Saccharomyces cerevisiae (strain ATCC 204508 / S288c) GN=HBT1 PE=1 SV=1	3110.5	true	2	113616	67	67	121	121	66	66	98	345254208	345254208
76931	TWF1_YEAST	TWF1	sp|P53250|TWF1_YEAST Twinfilin-1 OS=Saccharomyces cerevisiae (strain ATCC 204508 / S288c) GN=TWF1 PE=1 SV=1	22.503	true	2	37071	1	1	1	1	1	1	1	512817	512817
76932	SEC31_YEAST	SEC31	sp|P38968|SEC31_YEAST Protein transport protein SEC31 OS=Saccharomyces cerevisiae (strain ATCC 204508 / S288c) GN=SEC31 PE=1 SV=3	59.632	true	2	138717	2	2	2	2	2	2	2	817581	817581
76933	GTS1_YEAST	GTS1	sp|P40956|GTS1_YEAST Protein GTS1 OS=Saccharomyces cerevisiae (strain ATCC 204508 / S288c) GN=GTS1 PE=1 SV=2	23.656	true	2	44407	1	1	1	1	1	1	1	242998	242998
76934	SMY2_YEAST	SMY2	sp|P32909|SMY2_YEAST Protein SMY2 OS=Saccharomyces cerevisiae (strain ATCC 204508 / S288c) GN=SMY2 PE=1 SV=2	89.348	true	2	81397	4	4	4	4	4	4	4	1.50994e+06	1.50994e+06
76935	MDHM_YEAST	MDH1	sp|P17505|MDHM_YEAST Malate dehydrogenase, mitochondrial OS=Saccharomyces cerevisiae (strain ATCC 204508 / S288c) GN=MDH1 PE=1 SV=2	424.875	true	2	35650	12	12	15	15	12	12	14	20519768	20519768
76936	GVP36_YEAST	GVP36	sp|P40531|GVP36_YEAST Protein GVP36 OS=Saccharomyces cerevisiae (strain ATCC 204508 / S288c) GN=GVP36 PE=1 SV=1	48.247	true	2	36670	2	2	3	3	2	2	3	846676	846676
76937	YL361_YEAST	YLR361C-A	sp|Q3E795|YL361_YEAST Uncharacterized protein YLR361C-A OS=Saccharomyces cerevisiae (strain ATCC 204508 / S288c) GN=YLR361C-A PE=1 SV=1	135.03	true	2	11050	4	4	6	6	4	4	5	12551225	12551225
76938	IF4B_YEAST	TIF3	sp|P34167|IF4B_YEAST Eukaryotic translation initiation factor 4B OS=Saccharomyces cerevisiae (strain ATCC 204508 / S288c) GN=TIF3 PE=1 SV=1	223.241	true	2	48522	10	10	12	12	10	10	12	14550883	14550883
76939	RT12_YEAST	MRPS12	sp|P53732|RT12_YEAST 37S ribosomal protein S12, mitochondrial OS=Saccharomyces cerevisiae (strain ATCC 204508 / S288c) GN=MRPS12 PE=1 SV=1	49.216	true	2	16917	2	2	2	2	2	2	2	1.09921e+06	1.09921e+06
76941	NOP56_YEAST	NOP56	sp|Q12460|NOP56_YEAST Nucleolar protein 56 OS=Saccharomyces cerevisiae (strain ATCC 204508 / S288c) GN=NOP56 PE=1 SV=1	74.484	true	2	56864	3	3	3	3	3	3	3	3.11776e+06	3.11776e+06
76942	RGI2_YEAS1	RGI2	sp|B3LTR3|RGI2_YEAS1 Respiratory growth induced protein 2 OS=Saccharomyces cerevisiae (strain RM11-1a) GN=RGI2 PE=3 SV=1	92.434	true	2	19257	2	2	2	2	2	2	2	761792	761792
76943	CDC48_YEAST	CDC48	sp|P25694|CDC48_YEAST Cell division control protein 48 OS=Saccharomyces cerevisiae (strain ATCC 204508 / S288c) GN=CDC48 PE=1 SV=3	147.475	true	2	91996	8	8	8	8	8	8	8	5.16527e+06	5.16527e+06
76944	DCP2_YEAS7	DCP2	sp|A6ZRW5|DCP2_YEAS7 mRNA-decapping enzyme subunit 2 OS=Saccharomyces cerevisiae (strain YJM789) GN=DCP2 PE=3 SV=1	55.169	true	2	108657	2	2	2	2	2	2	2	396884	396884
76945	ATIF_YEAST	INH1	sp|P01097|ATIF_YEAST ATPase inhibitor, mitochondrial OS=Saccharomyces cerevisiae (strain ATCC 204508 / S288c) GN=INH1 PE=1 SV=2	272.67	true	2	9870	9	9	15	15	9	9	12	46962748	46962748
76946	CTR1_YEAST	CTR1	sp|P49573|CTR1_YEAST Copper transport protein CTR1 OS=Saccharomyces cerevisiae (strain ATCC 204508 / S288c) GN=CTR1 PE=1 SV=1	73.754	true	2	44442	1	1	1	1	1	1	1	1.5193e+06	1.5193e+06
76947	MAK21_YEAST	MAK21	sp|Q12176|MAK21_YEAST Ribosome biogenesis protein MAK21 OS=Saccharomyces cerevisiae (strain ATCC 204508 / S288c) GN=MAK21 PE=1 SV=1	54.781	true	2	116677	1	1	1	1	1	1	1	446771	446771
76948	RM39_YEAST	MRPL39	sp|P36533|RM39_YEAST 54S ribosomal protein L39, mitochondrial OS=Saccharomyces cerevisiae (strain ATCC 204508 / S288c) GN=MRPL39 PE=1 SV=3	38.278	true	2	7973	1	1	1	1	1	1	1	1.21232e+06	1.21232e+06
76949	RRS1_YEAST	RRS1	sp|Q08746|RRS1_YEAST Regulator of ribosome biosynthesis OS=Saccharomyces cerevisiae (strain ATCC 204508 / S288c) GN=RRS1 PE=1 SV=1	172.259	true	2	22963	4	4	4	4	4	4	4	5.74508e+06	5.74508e+06
76950	LSB3_YEAS7	LSB3	sp|A7A261|LSB3_YEAS7 LAS seventeen-binding protein 3 OS=Saccharomyces cerevisiae (strain YJM789) GN=LSB3 PE=3 SV=2	147.056	true	2	49344	5	5	5	5	5	5	5	3.49409e+06	3.49409e+06
76951	STF2_YEAST	STF2	sp|P16965|STF2_YEAST ATPase-stabilizing factor 15 kDa protein OS=Saccharomyces cerevisiae (strain ATCC 204508 / S288c) GN=STF2 PE=1 SV=2	65.325	true	2	9615	3	3	6	6	3	3	3	18007226	18007226
76952	IF4F1_YEAST	TIF4631	sp|P39935|IF4F1_YEAST Eukaryotic initiation factor 4F subunit p150 OS=Saccharomyces cerevisiae (strain ATCC 204508 / S288c) GN=TIF4631 PE=1 SV=2	448.778	true	2	107101	12	12	13	13	12	12	13	12507435	12507435
76953	YGZ2_YEAST	YGL242C	sp|P53066|YGZ2_YEAST Ankyrin repeat-containing protein YGL242C OS=Saccharomyces cerevisiae (strain ATCC 204508 / S288c) GN=YGL242C PE=1 SV=1	30.508	true	2	20074	1	1	1	1	0
76954	PDI_YEAST	PDI1	sp|P17967|PDI_YEAST Protein disulfide-isomerase OS=Saccharomyces cerevisiae (strain ATCC 204508 / S288c) GN=PDI1 PE=1 SV=2	303	true	2	58227	8	8	10	10	8	8	9	13142218	13142218
76955	CKS1_YEAST	CKS1	sp|P20486|CKS1_YEAST Cyclin-dependent kinases regulatory subunit OS=Saccharomyces cerevisiae (strain ATCC 204508 / S288c) GN=CKS1 PE=1 SV=1	23.422	true	2	17795	1	1	1	1	1	1	1	591879	591879
76956	GPX3_YEAST	HYR1	sp|P40581|GPX3_YEAST Peroxiredoxin HYR1 OS=Saccharomyces cerevisiae (strain ATCC 204508 / S288c) GN=HYR1 PE=1 SV=1	183.512	true	2	18641	7	7	7	7	7	7	7	8593306	8593306
76957	TIM44_YEAST	TIM44	sp|Q01852|TIM44_YEAST Mitochondrial import inner membrane translocase subunit TIM44 OS=Saccharomyces cerevisiae (strain ATCC 204508 / S288c) GN=TIM44 PE=1 SV=1	214.345	true	2	48854	7	7	7	7	7	7	7	6326926	6326926
76958	RT19_YEAST	RSM19	sp|P53733|RT19_YEAST 37S ribosomal protein S19, mitochondrial OS=Saccharomyces cerevisiae (strain ATCC 204508 / S288c) GN=RSM19 PE=1 SV=1	74.85	true	2	10275	3	3	3	3	3	3	3	4650481	4650481
76959	RL24B_YEAST	RPL24B	sp|P24000|RL24B_YEAST 60S ribosomal protein L24-B OS=Saccharomyces cerevisiae (strain ATCC 204508 / S288c) GN=RPL24B PE=1 SV=1	230.684	true	2	17548	7	1	10	1	7	7	9	33354048	33354048
76960	RL24A_YEAST	RPL24A	sp|P04449|RL24A_YEAST 60S ribosomal protein L24-A OS=Saccharomyces cerevisiae (strain ATCC 204508 / S288c) GN=RPL24A PE=1 SV=1	221.592	true	2	17614	7	1	11	2	7	7	9	33591884	33591884
76961	SDH3_YEAST	SDH3	sp|P33421|SDH3_YEAST Succinate dehydrogenase [ubiquinone] cytochrome b subunit, mitochondrial OS=Saccharomyces cerevisiae (strain ATCC 204508 / S288c) GN=SDH3 PE=1 SV=1	18.921	true	2	22068	1	1	1	1	1	1	1	560197	560197
76962	RL18A_YEAST	RPL18A	sp|P0CX49|RL18A_YEAST 60S ribosomal protein L18-A OS=Saccharomyces cerevisiae (strain ATCC 204508 / S288c) GN=RPL18A PE=1 SV=1	42.748	true	2	20563	2	2	2	2	2	2	2	2084599	2084599
76963	YRB1_YEAST	YRB1	sp|P41920|YRB1_YEAST Ran-specific GTPase-activating protein 1 OS=Saccharomyces cerevisiae (strain ATCC 204508 / S288c) GN=YRB1 PE=1 SV=1	27.612	true	2	22953	1	1	1	1	1	1	1	514966	514966
76964	WHI2_YEAST	WHI2	sp|P12611|WHI2_YEAST Growth regulation protein OS=Saccharomyces cerevisiae (strain ATCC 204508 / S288c) GN=WHI2 PE=1 SV=2	10.222	true	2	55346	1	1	1	1	1	1	1	179907	179907
76965	RM20_YEAST	MRPL20	sp|P22354|RM20_YEAST 54S ribosomal protein L20, mitochondrial OS=Saccharomyces cerevisiae (strain ATCC 204508 / S288c) GN=MRPL20 PE=1 SV=2	25.554	true	2	22392	1	1	1	1	1	1	1	461726	461726
76966	NOP16_YEAST	NOP16	sp|P40007|NOP16_YEAST Nucleolar protein 16 OS=Saccharomyces cerevisiae (strain ATCC 204508 / S288c) GN=NOP16 PE=1 SV=1	67.066	true	2	26901	2	2	2	2	2	2	2	1.34757e+06	1.34757e+06
76967	CYPD_YEAST	CPR5	sp|P35176|CYPD_YEAST Peptidyl-prolyl cis-trans isomerase D OS=Saccharomyces cerevisiae (strain ATCC 204508 / S288c) GN=CPR5 PE=2 SV=1	16.184	true	2	25327	1	1	1	1	1	1	1	1.36622e+06	1.36622e+06
76968	TMA7_YEAST	TMA7	sp|Q3E764|TMA7_YEAST Translation machinery-associated protein 7 OS=Saccharomyces cerevisiae (strain ATCC 204508 / S288c) GN=TMA7 PE=1 SV=1	196.55	true	2	6941	7	7	9	9	7	7	8	15732844	15732844
76969	SRP14_YEAST	SRP14	sp|P38985|SRP14_YEAST Signal recognition particle subunit SRP14 OS=Saccharomyces cerevisiae (strain ATCC 204508 / S288c) GN=SRP14 PE=1 SV=1	15.547	true	2	16430	1	1	1	1	1	1	1	291990	291990
76970	IF1A_YEAST	TIF11	sp|P38912|IF1A_YEAST Eukaryotic translation initiation factor 1A OS=Saccharomyces cerevisiae (strain ATCC 204508 / S288c) GN=TIF11 PE=1 SV=1	164.459	true	2	17435	5	5	7	7	5	5	6	12569525	12569525
76971	IF4A_YEAS7	TIF1	sp|A6ZQJ1|IF4A_YEAS7 ATP-dependent RNA helicase eIF4A OS=Saccharomyces cerevisiae (strain YJM789) GN=TIF1 PE=3 SV=1	199.942	true	2	44697	7	7	8	8	7	7	7	6007477	6007477
76972	NSP1_YEAST	NSP1	sp|P14907|NSP1_YEAST Nucleoporin NSP1 OS=Saccharomyces cerevisiae (strain ATCC 204508 / S288c) GN=NSP1 PE=1 SV=1	305.353	true	2	86516	9	9	10	10	9	9	9	4.84322e+06	4.84322e+06
76973	RS8A_YEAST	RPS8A	sp|P0CX39|RS8A_YEAST 40S ribosomal protein S8-A OS=Saccharomyces cerevisiae (strain ATCC 204508 / S288c) GN=RPS8A PE=1 SV=1	99.965	true	2	22490	3	3	3	3	3	3	3	1.9544e+06	1.9544e+06
76974	EIF3A_YEAST	RPG1	sp|P38249|EIF3A_YEAST Eukaryotic translation initiation factor 3 subunit A OS=Saccharomyces cerevisiae (strain ATCC 204508 / S288c) GN=RPG1 PE=1 SV=1	137.357	true	2	110344	5	5	6	6	5	5	5	4991214	4991214
76975	UTP11_YEAS6	UTP11	sp|B5VM59|UTP11_YEAS6 U3 small nucleolar RNA-associated protein 11 OS=Saccharomyces cerevisiae (strain AWRI1631) GN=UTP11 PE=3 SV=1	62.543	true	2	29735	3	3	3	3	3	3	3	1344208	1344208
76976	TMA46_YEAST	TMA46	sp|Q12000|TMA46_YEAST Translation machinery-associated protein 46 OS=Saccharomyces cerevisiae (strain ATCC 204508 / S288c) GN=TMA46 PE=1 SV=2	119.754	true	2	39514	3	3	3	3	3	3	3	2645974	2645974
76977	TAF12_YEAST	TAF12	sp|Q03761|TAF12_YEAST Transcription initiation factor TFIID subunit 12 OS=Saccharomyces cerevisiae (strain ATCC 204508 / S288c) GN=TAF12 PE=1 SV=1	18.978	true	2	61073	1	1	1	1	1	1	1	252882	252882
76978	IF5_YEAST	TIF5	sp|P38431|IF5_YEAST Eukaryotic translation initiation factor 5 OS=Saccharomyces cerevisiae (strain ATCC 204508 / S288c) GN=TIF5 PE=1 SV=1	95.343	true	2	45261	4	4	5	5	4	4	5	3464507	3464507
76979	FMP52_YEAST	FMP52	sp|P40008|FMP52_YEAST Protein FMP52, mitochondrial OS=Saccharomyces cerevisiae (strain ATCC 204508 / S288c) GN=FMP52 PE=1 SV=1	40.225	true	2	25086	2	2	2	2	2	2	2	371127	371127
76980	LCP5_YEAST	LCP5	sp|P40079|LCP5_YEAST U3 small nucleolar ribonucleoprotein protein LCP5 OS=Saccharomyces cerevisiae (strain ATCC 204508 / S288c) GN=LCP5 PE=1 SV=1	33.969	true	2	40794	2	2	2	2	2	2	2	561007	561007
76981	H4_YEAST	HHF1	sp|P02309|H4_YEAST Histone H4 OS=Saccharomyces cerevisiae (strain ATCC 204508 / S288c) GN=HHF1 PE=1 SV=2	61.488	true	2	11368	3	3	3	3	3	3	3	1.77886e+06	1.77886e+06
76982	TSL1_YEAST	TSL1	sp|P38427|TSL1_YEAST Trehalose synthase complex regulatory subunit TSL1 OS=Saccharomyces cerevisiae (strain ATCC 204508 / S288c) GN=TSL1 PE=1 SV=1	139.547	true	2	123018	6	6	6	6	6	6	6	4.06794e+06	4.06794e+06
76983	ACA2_YEAST	CST6	sp|P40535|ACA2_YEAST ATF/CREB activator 2 OS=Saccharomyces cerevisiae (strain ATCC 204508 / S288c) GN=CST6 PE=1 SV=1	11.131	true	2	65264	1	1	1	1	1	1	1	230678	230678
76984	RNQ1_YEAST	RNQ1	sp|P25367|RNQ1_YEAST [PIN+] prion protein RNQ1 OS=Saccharomyces cerevisiae (strain ATCC 204508 / S288c) GN=RNQ1 PE=1 SV=2	231.235	true	2	42580	4	4	5	5	4	4	4	3564824	3564824
76985	BMH1_YEAST	BMH1	sp|P29311|BMH1_YEAST Protein BMH1 OS=Saccharomyces cerevisiae (strain ATCC 204508 / S288c) GN=BMH1 PE=1 SV=4	170.443	true	2	30091	7	1	8	1	7	7	7	5.15971e+06	5.15971e+06
76986	BMH2_YEAST	BMH2	sp|P34730|BMH2_YEAST Protein BMH2 OS=Saccharomyces cerevisiae (strain ATCC 204508 / S288c) GN=BMH2 PE=1 SV=3	129.005	true	2	31061	7	1	8	1	7	7	7	4999118	4999118
76987	KPYK1_YEAST	CDC19	sp|P00549|KPYK1_YEAST Pyruvate kinase 1 OS=Saccharomyces cerevisiae (strain ATCC 204508 / S288c) GN=CDC19 PE=1 SV=2	263.421	true	2	54545	9	9	10	10	9	9	10	6.50126e+06	6.50126e+06
76988	YNT5_YEAST	YNL195C	sp|P40168|YNT5_YEAST Uncharacterized protein YNL195C OS=Saccharomyces cerevisiae (strain ATCC 204508 / S288c) GN=YNL195C PE=4 SV=2	10.794	true	2	28321	1	1	1	1	1	1	1	223270	223270
76989	NUP2_YEAST	NUP2	sp|P32499|NUP2_YEAST Nucleoporin NUP2 OS=Saccharomyces cerevisiae (strain ATCC 204508 / S288c) GN=NUP2 PE=1 SV=2	245.452	true	2	77881	11	11	12	12	11	11	12	9210184	9210184
76990	SDHA_YEAST	SDH1	sp|Q00711|SDHA_YEAST Succinate dehydrogenase [ubiquinone] flavoprotein subunit, mitochondrial OS=Saccharomyces cerevisiae (strain ATCC 204508 / S288c) GN=SDH1 PE=1 SV=1	102.121	true	2	70229	3	3	3	3	3	3	3	4339445	4339445
76991	TPM1_YEAST	TPM1	sp|P17536|TPM1_YEAST Tropomyosin-1 OS=Saccharomyces cerevisiae (strain ATCC 204508 / S288c) GN=TPM1 PE=1 SV=1	491.762	true	2	23541	17	17	21	21	17	17	17	32856764	32856764
76992	LONM_YEAST	PIM1	sp|P36775|LONM_YEAST Lon protease homolog, mitochondrial OS=Saccharomyces cerevisiae (strain ATCC 204508 / S288c) GN=PIM1 PE=1 SV=2	15.331	true	2	127112	1	1	1	1	1	1	1	223215	223215
76993	PBP4_YEAST	PBP4	sp|Q07362|PBP4_YEAST Protein PBP4 OS=Saccharomyces cerevisiae (strain ATCC 204508 / S288c) GN=PBP4 PE=1 SV=1	279.566	true	2	19881	7	7	7	7	7	7	7	10415806	10415806
76994	ATP19_YEAST	ATP19	sp|P81451|ATP19_YEAST ATP synthase subunit K, mitochondrial OS=Saccharomyces cerevisiae (strain ATCC 204508 / S288c) GN=ATP19 PE=1 SV=1	105.43	true	2	7534	5	5	6	6	5	5	5	4521873	4521873
76995	RRP17_YEAST	RRP17	sp|Q04031|RRP17_YEAST Ribosomal RNA-processing protein 17 OS=Saccharomyces cerevisiae (strain ATCC 204508 / S288c) GN=RRP17 PE=1 SV=1	39.343	true	2	27974	2	2	2	2	2	2	2	597177	597177
76996	RM36_YEAST	MRPL36	sp|P36531|RM36_YEAST 54S ribosomal protein L36, mitochondrial OS=Saccharomyces cerevisiae (strain ATCC 204508 / S288c) GN=MRPL36 PE=1 SV=3	108.618	true	2	20091	3	3	4	4	3	3	3	2.61229e+06	2.61229e+06
76997	RL14A_YEAST	RPL14A	sp|P36105|RL14A_YEAST 60S ribosomal protein L14-A OS=Saccharomyces cerevisiae (strain ATCC 204508 / S288c) GN=RPL14A PE=1 SV=1	31.844	true	2	15167	2	2	2	2	2	2	2	882755	882755
76998	ADR1_YEAST	ADR1	sp|P07248|ADR1_YEAST Regulatory protein ADR1 OS=Saccharomyces cerevisiae (strain ATCC 204508 / S288c) GN=ADR1 PE=1 SV=2	29.284	true	2	150941	1	1	1	1	1	1	1	159552	159552
76999	IPB2_YEAST	PBI2	sp|P0CT04|IPB2_YEAST Protease B inhibitor 2 OS=Saccharomyces cerevisiae (strain ATCC 204508 / S288c) GN=PBI2 PE=1 SV=1	189.003	true	2	8590	6	6	10	10	6	6	8	47069868	47069868
77000	YMW4_YEAST	YMR074C	sp|Q04773|YMW4_YEAST Uncharacterized protein YMR074C OS=Saccharomyces cerevisiae (strain ATCC 204508 / S288c) GN=YMR074C PE=1 SV=1	31.981	true	2	15977	1	1	1	1	1	1	1	284201	284201
77001	RS28A_YEAST	RPS28A	sp|Q3E7X9|RS28A_YEAST 40S ribosomal protein S28-A OS=Saccharomyces cerevisiae (strain ATCC 204508 / S288c) GN=RPS28A PE=1 SV=1	157.755	true	2	7592	4	4	5	5	4	4	5	23180600	23180600
77002	YP107_YEAST	YPL107W	sp|Q02873|YP107_YEAST UPF0651 protein YPL107W, mitochondrial OS=Saccharomyces cerevisiae (strain ATCC 204508 / S288c) GN=YPL107W PE=1 SV=1	19.831	true	2	28570	1	1	1	1	1	1	1	393018	393018
77003	HSP26_YEAST	HSP26	sp|P15992|HSP26_YEAST Heat shock protein 26 OS=Saccharomyces cerevisiae (strain ATCC 204508 / S288c) GN=HSP26 PE=1 SV=3	10.541	true	2	23880	1	1	1	1	1	1	1	376122	376122
77004	LEE1_YEAST	LEE1	sp|Q02799|LEE1_YEAST Zinc finger protein LEE1 OS=Saccharomyces cerevisiae (strain ATCC 204508 / S288c) GN=LEE1 PE=1 SV=1	38.481	true	2	33596	2	2	2	2	2	2	2	327880	327880
77005	RL37A_YEAST	RPL37A	sp|P49166|RL37A_YEAST 60S ribosomal protein L37-A OS=Saccharomyces cerevisiae (strain ATCC 204508 / S288c) GN=RPL37A PE=1 SV=2	63.375	true	2	9850	4	4	4	4	4	4	4	21473074	21473074
77006	OLA1_YEAST	OLA1	sp|P38219|OLA1_YEAST Obg-like ATPase 1 OS=Saccharomyces cerevisiae (strain ATCC 204508 / S288c) GN=OLA1 PE=1 SV=1	220.279	true	2	44174	7	7	9	9	6	6	8	7.99689e+06	7.99689e+06
77007	YG41A_YEAST	YGL041W-A	sp|P0C5N3|YG41A_YEAST Uncharacterized protein YGL041W-A, mitochondrial OS=Saccharomyces cerevisiae (strain ATCC 204508 / S288c) GN=YGL041W-A PE=1 SV=2	62.972	true	2	18103	3	3	3	3	3	3	3	3.41197e+06	3.41197e+06
77008	MIG1_YEAST	MIG1	sp|P27705|MIG1_YEAST Regulatory protein MIG1 OS=Saccharomyces cerevisiae (strain ATCC 204508 / S288c) GN=MIG1 PE=1 SV=1	25.428	true	2	55532	1	1	1	1	1	1	1	120837	120837
77009	GBLP_YEAST	ASC1	sp|P38011|GBLP_YEAST Guanine nucleotide-binding protein subunit beta-like protein OS=Saccharomyces cerevisiae (strain ATCC 204508 / S288c) GN=ASC1 PE=1 SV=4	106.378	true	2	34805	3	3	3	3	3	3	3	1.48853e+06	1.48853e+06
77010	NUM1_YEAST	NUM1	sp|Q00402|NUM1_YEAST Nuclear migration protein NUM1 OS=Saccharomyces cerevisiae (strain ATCC 204508 / S288c) GN=NUM1 PE=1 SV=2	44.735	true	2	313033	2	2	3	3	2	2	2	6257800	6257800
77012	H1_YEAST	HHO1	sp|P53551|H1_YEAST Histone H1 OS=Saccharomyces cerevisiae (strain ATCC 204508 / S288c) GN=HHO1 PE=1 SV=1	120.531	true	2	27804	6	6	6	6	6	6	6	4.18181e+06	4.18181e+06
77013	YCU1_YEAST	YCR051W	sp|P25631|YCU1_YEAST Ankyrin repeat-containing protein YCR051W OS=Saccharomyces cerevisiae (strain ATCC 204508 / S288c) GN=YCR051W PE=1 SV=1	59.659	true	2	24694	2	2	2	2	2	2	2	474131	474131
77014	RPA34_YEAST	RPA34	sp|P47006|RPA34_YEAST DNA-directed RNA polymerase I subunit RPA34 OS=Saccharomyces cerevisiae (strain ATCC 204508 / S288c) GN=RPA34 PE=1 SV=1	135.712	true	2	26875	5	5	6	6	5	5	5	9372984	9372984
77016	TIM13_YEAST	TIM13	sp|P53299|TIM13_YEAST Mitochondrial import inner membrane translocase subunit TIM13 OS=Saccharomyces cerevisiae (strain ATCC 204508 / S288c) GN=TIM13 PE=1 SV=1	63.856	true	2	11286	1	1	1	1	1	1	1	698744	698744
77017	RT16_YEAST	MRPS16	sp|Q02608|RT16_YEAST 37S ribosomal protein S16, mitochondrial OS=Saccharomyces cerevisiae (strain ATCC 204508 / S288c) GN=MRPS16 PE=1 SV=1	33.153	true	2	13639	1	1	1	1	1	1	1	294768	294768
77018	MNP1_YEAST	MNP1	sp|P53163|MNP1_YEAST 54S ribosomal protein L12, mitochondrial OS=Saccharomyces cerevisiae (strain ATCC 204508 / S288c) GN=MNP1 PE=1 SV=1	194.316	true	2	20650	5	5	10	10	5	5	8	20814688	20814688
77019	NOP6_YEAST	NOP6	sp|Q07623|NOP6_YEAST Nucleolar protein 6 OS=Saccharomyces cerevisiae (strain ATCC 204508 / S288c) GN=NOP6 PE=1 SV=1	82.64	true	2	25216	4	4	5	5	4	4	4	3.74663e+06	3.74663e+06
77020	RS11A_YEAST	RPS11A	sp|P0CX47|RS11A_YEAST 40S ribosomal protein S11-A OS=Saccharomyces cerevisiae (strain ATCC 204508 / S288c) GN=RPS11A PE=1 SV=1	49.921	true	2	17749	4	4	5	5	4	4	5	2937123	2937123
77021	RL8B_YEAST	RPL8B	sp|P29453|RL8B_YEAST 60S ribosomal protein L8-B OS=Saccharomyces cerevisiae (strain ATCC 204508 / S288c) GN=RPL8B PE=1 SV=3	258.751	true	2	28112	11	2	12	3	11	11	11	14612244	14612244
77022	RL8A_YEAST	RPL8A	sp|P17076|RL8A_YEAST 60S ribosomal protein L8-A OS=Saccharomyces cerevisiae (strain ATCC 204508 / S288c) GN=RPL8A PE=1 SV=4	241.57	true	2	28125	10	1	10	1	10	10	10	13604248	13604248
77023	COXM1_YEAS1	CMC1	sp|B3LQW4|COXM1_YEAS1 COX assembly mitochondrial protein OS=Saccharomyces cerevisiae (strain RM11-1a) GN=CMC1 PE=3 SV=2	35.216	true	2	13034	1	1	1	1	1	1	1	1.29948e+06	1.29948e+06
77024	RS4A_YEAST	RPS4A	sp|P0CX35|RS4A_YEAST 40S ribosomal protein S4-A OS=Saccharomyces cerevisiae (strain ATCC 204508 / S288c) GN=RPS4A PE=1 SV=1	108.716	true	2	29410	5	5	5	5	5	5	5	5.02245e+06	5.02245e+06
77025	SIC1_YEAST	SIC1	sp|P38634|SIC1_YEAST Protein SIC1 OS=Saccharomyces cerevisiae (strain ATCC 204508 / S288c) GN=SIC1 PE=1 SV=1	10.681	true	2	32223	1	1	1	1	1	1	1	379420	379420
77026	RBA50_YEAST	RBA50	sp|Q04418|RBA50_YEAST RNA polymerase II-associated protein RBA50 OS=Saccharomyces cerevisiae (strain ATCC 204508 / S288c) GN=RBA50 PE=1 SV=2	41.966	true	2	50192	1	1	1	1	1	1	1	222823	222823
77027	INV2_YEAST	SUC2	sp|P00724|INV2_YEAST Invertase 2 OS=Saccharomyces cerevisiae (strain ATCC 204508 / S288c) GN=SUC2 PE=1 SV=1	127.282	true	2	60639	5	5	5	5	5	5	5	7284350	7284350
77028	FKBP2_YEAST	FPR2	sp|P32472|FKBP2_YEAST Peptidyl-prolyl cis-trans isomerase FPR2 OS=Saccharomyces cerevisiae (strain ATCC 204508 / S288c) GN=FPR2 PE=1 SV=1	25.11	true	2	14487	1	1	1	1	1	1	1	348306	348306
77029	RL20A_YEAST	RPL20A	sp|P0CX23|RL20A_YEAST 60S ribosomal protein L20-A OS=Saccharomyces cerevisiae (strain ATCC 204508 / S288c) GN=RPL20A PE=1 SV=1	95.209	true	2	20437	5	5	5	5	5	5	5	4372840	4372840
77030	SS120_YEAST	SSP120	sp|P39931|SS120_YEAST Protein SSP120 OS=Saccharomyces cerevisiae (strain ATCC 204508 / S288c) GN=SSP120 PE=1 SV=1	190.152	true	2	27289	5	5	6	6	5	5	6	10586503	10586503
77032	YO020_YEAST	YOR020W-A	sp|Q3E824|YO020_YEAST Uncharacterized protein YOR020W-A OS=Saccharomyces cerevisiae (strain ATCC 204508 / S288c) GN=YOR020W-A PE=4 SV=1	39.894	true	2	9618	1	1	1	1	1	1	1	918788	918788
77033	PMG1_YEAST	GPM1	sp|P00950|PMG1_YEAST Phosphoglycerate mutase 1 OS=Saccharomyces cerevisiae (strain ATCC 204508 / S288c) GN=GPM1 PE=1 SV=3	218.306	true	2	27609	6	6	6	6	6	6	6	11400876	11400876
77034	SEC9_YEAST	SEC9	sp|P40357|SEC9_YEAST Protein transport protein SEC9 OS=Saccharomyces cerevisiae (strain ATCC 204508 / S288c) GN=SEC9 PE=1 SV=1	51.116	true	2	73624	1	1	1	1	1	1	1	173717	173717
77035	KGUA_YEAST	GUK1	sp|P15454|KGUA_YEAST Guanylate kinase OS=Saccharomyces cerevisiae (strain ATCC 204508 / S288c) GN=GUK1 PE=1 SV=2	37.353	true	2	20637	1	1	1	1	1	1	1	382195	382195
77036	MTC1_YEAST	MTC1	sp|P47018|MTC1_YEAST Maintenance of telomere capping protein 1 OS=Saccharomyces cerevisiae (strain ATCC 204508 / S288c) GN=MTC1 PE=1 SV=1	16.147	true	2	53477	1	1	1	1	1	1	1	408337	408337
77037	YL257_YEAST	YLR257W	sp|Q06146|YL257_YEAST Uncharacterized protein YLR257W OS=Saccharomyces cerevisiae (strain ATCC 204508 / S288c) GN=YLR257W PE=1 SV=1	290.83	true	2	35998	9	9	11	11	9	9	9	12104073	12104073
77038	EAP1_YEAST	EAP1	sp|P36041|EAP1_YEAST Protein EAP1 OS=Saccharomyces cerevisiae (strain ATCC 204508 / S288c) GN=EAP1 PE=1 SV=1	330.582	true	2	69762	9	9	9	9	9	9	9	6.69853e+06	6.69853e+06
77039	RT31_YEAST	YMR31	sp|P19955|RT31_YEAST 37S ribosomal protein YMR-31, mitochondrial OS=Saccharomyces cerevisiae (strain ATCC 204508 / S288c) GN=YMR31 PE=1 SV=1	128.784	true	2	13689	4	4	5	5	4	4	4	5.28666e+06	5.28666e+06
77040	YAP1_YEAST	YAP1	sp|P19880|YAP1_YEAST AP-1-like transcription factor YAP1 OS=Saccharomyces cerevisiae (strain ATCC 204508 / S288c) GN=YAP1 PE=1 SV=2	24.819	true	2	72533	1	1	1	1	1	1	1	279734	279734
77041	HSP60_YEAST	HSP60	sp|P19882|HSP60_YEAST Heat shock protein 60, mitochondrial OS=Saccharomyces cerevisiae (strain ATCC 204508 / S288c) GN=HSP60 PE=1 SV=1	221.099	true	2	60752	6	6	6	6	6	6	6	2211302	2211302
77042	YM58_YEAST	YMR206W	sp|Q03695|YM58_YEAST Uncharacterized protein YMR206W OS=Saccharomyces cerevisiae (strain ATCC 204508 / S288c) GN=YMR206W PE=4 SV=1	153.947	true	2	35018	3	3	3	3	2	2	2	1.0409e+06	1.0409e+06
77043	SBA1_YEAST	SBA1	sp|P28707|SBA1_YEAST Co-chaperone protein SBA1 OS=Saccharomyces cerevisiae (strain ATCC 204508 / S288c) GN=SBA1 PE=1 SV=3	70.938	true	2	24082	2	2	2	2	2	2	2	2793952	2793952
77044	IPYR_YEAST	IPP1	sp|P00817|IPYR_YEAST Inorganic pyrophosphatase OS=Saccharomyces cerevisiae (strain ATCC 204508 / S288c) GN=IPP1 PE=1 SV=4	30.42	true	2	32300	3	3	3	3	3	3	3	756044	756044
77045	RL3_YEAST	RPL3	sp|P14126|RL3_YEAST 60S ribosomal protein L3 OS=Saccharomyces cerevisiae (strain ATCC 204508 / S288c) GN=RPL3 PE=1 SV=4	209.122	true	2	43758	10	10	10	10	10	10	10	7.31994e+06	7.31994e+06
77046	RL33A_YEAST	RPL33A	sp|P05744|RL33A_YEAST 60S ribosomal protein L33-A OS=Saccharomyces cerevisiae (strain ATCC 204508 / S288c) GN=RPL33A PE=1 SV=3	32.785	true	2	12154	1	1	1	1	1	1	1	1.07343e+06	1.07343e+06
77047	COX5A_YEAST	COX5A	sp|P00424|COX5A_YEAST Cytochrome c oxidase polypeptide 5A, mitochondrial OS=Saccharomyces cerevisiae (strain ATCC 204508 / S288c) GN=COX5A PE=1 SV=1	170.015	true	2	17140	5	5	6	6	5	5	6	2686203	2686203
77048	PBP1_YEAST	PBP1	sp|P53297|PBP1_YEAST PAB1-binding protein 1 OS=Saccharomyces cerevisiae (strain ATCC 204508 / S288c) GN=PBP1 PE=1 SV=1	255.765	true	2	78781	7	7	8	8	7	7	7	7.14832e+06	7.14832e+06
77049	TIM10_YEAST	TIM10	sp|P87108|TIM10_YEAST Mitochondrial import inner membrane translocase subunit TIM10 OS=Saccharomyces cerevisiae (strain ATCC 204508 / S288c) GN=TIM10 PE=1 SV=1	163.331	true	2	10305	3	3	3	3	3	3	3	2.77961e+06	2.77961e+06
77050	SFP1_YEAST	SFP1	sp|P32432|SFP1_YEAST Transcription factor SFP1 OS=Saccharomyces cerevisiae (strain ATCC 204508 / S288c) GN=SFP1 PE=1 SV=1	51.697	true	2	74785	1	1	1	1	1	1	1	415759	415759
77051	UBC13_YEAST	UBC13	sp|P52490|UBC13_YEAST Ubiquitin-conjugating enzyme E2 13 OS=Saccharomyces cerevisiae (strain ATCC 204508 / S288c) GN=UBC13 PE=1 SV=1	20.947	true	2	17468	1	1	1	1	1	1	1	288149	288149
77052	PFD2_YEAST	GIM4	sp|P40005|PFD2_YEAST Prefoldin subunit 2 OS=Saccharomyces cerevisiae (strain ATCC 204508 / S288c) GN=GIM4 PE=1 SV=2	55.014	true	2	12994	3	3	3	3	3	3	3	1.5676e+06	1.5676e+06
77053	NACA_YEAS7	EGD2	sp|A6ZT99|NACA_YEAS7 Nascent polypeptide-associated complex subunit alpha OS=Saccharomyces cerevisiae (strain YJM789) GN=EGD2 PE=3 SV=1	381.159	true	2	18709	7	7	13	13	7	7	10	60478608	60478608
77054	YC16_YEAST	YCR087C-A	sp|P37263|YC16_YEAST UPF0743 protein YCR087C-A OS=Saccharomyces cerevisiae (strain ATCC 204508 / S288c) GN=YCR087C-A PE=1 SV=1	45.182	true	2	17738	2	2	2	2	2	2	2	4.39331e+06	4.39331e+06
77055	CAB3_YEAST	CAB3	sp|P36076|CAB3_YEAST Coenzyme A biosynthesis protein 3 OS=Saccharomyces cerevisiae (strain ATCC 204508 / S288c) GN=CAB3 PE=1 SV=1	22.493	true	2	65238	1	1	1	1	1	1	1	210296	210296
77056	RL4A_YEAST	RPL4A	sp|P10664|RL4A_YEAST 60S ribosomal protein L4-A OS=Saccharomyces cerevisiae (strain ATCC 204508 / S288c) GN=RPL4A PE=1 SV=4	197.688	true	2	39092	5	5	5	5	5	5	5	5843569	5843569
77057	RAS2_YEAST	RAS2	sp|P01120|RAS2_YEAST Ras-like protein 2 OS=Saccharomyces cerevisiae (strain ATCC 204508 / S288c) GN=RAS2 PE=1 SV=4	109.661	true	2	34705	2	2	2	2	2	2	2	4927802	4927802
77058	ATP7_YEAST	ATP7	sp|P30902|ATP7_YEAST ATP synthase subunit d, mitochondrial OS=Saccharomyces cerevisiae (strain ATCC 204508 / S288c) GN=ATP7 PE=1 SV=2	577.777	true	2	19810	13	13	22	22	13	13	16	70833960	70833960
77059	YNU8_YEAST	YNL208W	sp|P40159|YNU8_YEAST Uncharacterized protein YNL208W OS=Saccharomyces cerevisiae (strain ATCC 204508 / S288c) GN=YNL208W PE=1 SV=2	183.26	true	2	20151	5	5	6	6	5	5	5	11727870	11727870
77060	HUA1_YEAST	HUA1	sp|P40325|HUA1_YEAST Proline-rich protein HUA1 OS=Saccharomyces cerevisiae (strain ATCC 204508 / S288c) GN=HUA1 PE=1 SV=2	51.325	true	2	22435	2	2	2	2	2	2	2	620844	620844
77061	RRP14_YEAST	RRP14	sp|P36080|RRP14_YEAST Ribosomal RNA-processing protein 14 OS=Saccharomyces cerevisiae (strain ATCC 204508 / S288c) GN=RRP14 PE=1 SV=1	45.467	true	2	50482	3	3	3	3	3	3	3	2167536	2167536
77062	ALDH6_YEAST	ALD6	sp|P54115|ALDH6_YEAST Magnesium-activated aldehyde dehydrogenase, cytosolic OS=Saccharomyces cerevisiae (strain ATCC 204508 / S288c) GN=ALD6 PE=1 SV=4	34.009	true	2	54414	2	2	2	2	2	2	2	334617	334617
77063	ELO2_YEAST	ELO2	sp|P25358|ELO2_YEAST Elongation of fatty acids protein 2 OS=Saccharomyces cerevisiae (strain ATCC 204508 / S288c) GN=ELO2 PE=1 SV=1	27.219	true	2	40002	1	1	1	1	1	1	1	235470	235470
77064	RS24A_YEAST	RPS24A	sp|P0CX31|RS24A_YEAST 40S ribosomal protein S24-A OS=Saccharomyces cerevisiae (strain ATCC 204508 / S288c) GN=RPS24A PE=1 SV=1	125.837	true	2	15329	5	5	6	6	5	5	6	4.01959e+06	4.01959e+06
77065	RL28_YEAST	RPL28	sp|P02406|RL28_YEAST 60S ribosomal protein L28 OS=Saccharomyces cerevisiae (strain ATCC 204508 / S288c) GN=RPL28 PE=1 SV=3	34.216	true	2	16722	2	2	2	2	2	2	2	777211	777211
77066	TPS3_YEAST	TPS3	sp|P38426|TPS3_YEAST Trehalose synthase complex regulatory subunit TPS3 OS=Saccharomyces cerevisiae (strain ATCC 204508 / S288c) GN=TPS3 PE=1 SV=3	81.244	true	2	118835	3	3	3	3	3	3	3	733338	733338
77067	PUF3_YEAST	PUF3	sp|Q07807|PUF3_YEAST mRNA-binding protein PUF3 OS=Saccharomyces cerevisiae (strain ATCC 204508 / S288c) GN=PUF3 PE=1 SV=1	37.225	true	2	98068	2	2	2	2	2	2	2	1.14493e+06	1.14493e+06
77068	ATPA_YEAST	ATP1	sp|P07251|ATPA_YEAST ATP synthase subunit alpha, mitochondrial OS=Saccharomyces cerevisiae (strain ATCC 204508 / S288c) GN=ATP1 PE=1 SV=5	455.026	true	2	58608	16	16	17	17	16	16	17	23402124	23402124
77069	YM11_YEAST	YMR124W	sp|P39523|YM11_YEAST Uncharacterized protein YMR124W OS=Saccharomyces cerevisiae (strain ATCC 204508 / S288c) GN=YMR124W PE=1 SV=2	130.626	true	2	105914	4	4	4	4	4	4	4	1.32879e+06	1.32879e+06
77070	IPA3_YEAST	PAI3	sp|P01094|IPA3_YEAST Protease A inhibitor 3 OS=Saccharomyces cerevisiae (strain ATCC 204508 / S288c) GN=PAI3 PE=1 SV=1	58.903	true	2	7707	3	3	4	4	3	3	3	18011746	18011746
77071	ATPK_YEAST	ATP17	sp|Q06405|ATPK_YEAST ATP synthase subunit f, mitochondrial OS=Saccharomyces cerevisiae (strain ATCC 204508 / S288c) GN=ATP17 PE=1 SV=1	15.2	true	2	11312	1	1	1	1	1	1	1	1.77847e+06	1.77847e+06
77072	ZIM17_YEAS1	ZIM17	sp|B3LPE4|ZIM17_YEAS1 Mitochondrial protein import protein ZIM17 OS=Saccharomyces cerevisiae (strain RM11-1a) GN=ZIM17 PE=3 SV=2	41.16	true	2	19855	3	3	3	3	3	3	3	1.21361e+06	1.21361e+06
77073	STH1_YEAST	STH1	sp|P32597|STH1_YEAST Nuclear protein STH1/NPS1 OS=Saccharomyces cerevisiae (strain ATCC 204508 / S288c) GN=STH1 PE=1 SV=1	30.125	true	2	156743	1	1	1	1	1	1	1	218517	218517
77074	QCR1_YEAST	COR1	sp|P07256|QCR1_YEAST Cytochrome b-c1 complex subunit 1, mitochondrial OS=Saccharomyces cerevisiae (strain ATCC 204508 / S288c) GN=COR1 PE=1 SV=1	143.516	true	2	50228	6	6	6	6	6	6	6	4322732	4322732
77076	LOC1_YEAS7	LOC1	sp|A7A239|LOC1_YEAS7 60S ribosomal subunit assembly/export protein LOC1 OS=Saccharomyces cerevisiae (strain YJM789) GN=LOC1 PE=3 SV=1	182.698	true	2	23590	5	5	6	6	5	5	5	7.08624e+06	7.08624e+06
77077	YN034_YEAST	YNR034W-A	sp|Q3E841|YN034_YEAST Uncharacterized protein YNR034W-A OS=Saccharomyces cerevisiae (strain ATCC 204508 / S288c) GN=YNR034W-A PE=1 SV=1	420.538	true	2	10781	10	10	14	14	10	10	12	57444528	57444528
77078	RAD23_YEAST	RAD23	sp|P32628|RAD23_YEAST UV excision repair protein RAD23 OS=Saccharomyces cerevisiae (strain ATCC 204508 / S288c) GN=RAD23 PE=1 SV=1	24.725	true	2	42367	1	1	1	1	1	1	1	165517	165517
77079	SUB1_YEAST	SUB1	sp|P54000|SUB1_YEAST RNA polymerase II transcriptional coactivator SUB1 OS=Saccharomyces cerevisiae (strain ATCC 204508 / S288c) GN=SUB1 PE=1 SV=1	12.866	true	2	33102	1	1	1	1	1	1	1	118147	118147
77080	RLA3_YEAST	RPP1B	sp|P10622|RLA3_YEAST 60S acidic ribosomal protein P1-beta OS=Saccharomyces cerevisiae (strain ATCC 204508 / S288c) GN=RPP1B PE=1 SV=3	78.594	true	2	10668	1	1	1	1	1	1	1	1355601	1355601
77081	ACBP_YEAST	ACB1	sp|P31787|ACBP_YEAST Acyl-CoA-binding protein OS=Saccharomyces cerevisiae (strain ATCC 204508 / S288c) GN=ACB1 PE=1 SV=3	14.718	true	2	10061	2	2	4	4	2	2	2	3145500	3145500
77083	SSZ1_YEAST	SSZ1	sp|P38788|SSZ1_YEAST Ribosome-associated complex subunit SSZ1 OS=Saccharomyces cerevisiae (strain ATCC 204508 / S288c) GN=SSZ1 PE=1 SV=2	176.864	true	2	58238	6	6	6	6	6	6	6	3.30462e+06	3.30462e+06
77084	RL25_YEAST	RPL25	sp|P04456|RL25_YEAST 60S ribosomal protein L25 OS=Saccharomyces cerevisiae (strain ATCC 204508 / S288c) GN=RPL25 PE=1 SV=4	119.822	true	2	15758	3	3	3	3	3	3	3	2355648	2355648
77085	RDL1_YEAST	RDL1	sp|Q12305|RDL1_YEAST Thiosulfate sulfurtransferase RDL1, mitochondrial OS=Saccharomyces cerevisiae (strain ATCC 204508 / S288c) GN=RDL1 PE=1 SV=1	298.65	true	2	15413	9	9	12	12	9	9	9	16163125	16163125
77086	CISY1_YEAST	CIT1	sp|P00890|CISY1_YEAST Citrate synthase, mitochondrial OS=Saccharomyces cerevisiae (strain ATCC 204508 / S288c) GN=CIT1 PE=1 SV=2	116.165	true	2	53360	3	3	4	4	3	3	3	1.61854e+06	1.61854e+06
77087	SAS10_YEAST	SAS10	sp|Q12136|SAS10_YEAST Something about silencing protein 10 OS=Saccharomyces cerevisiae (strain ATCC 204508 / S288c) GN=SAS10 PE=1 SV=1	128.259	true	2	70259	3	3	4	4	3	3	3	1.34931e+06	1.34931e+06
77088	SMT3_YEAST	SMT3	sp|Q12306|SMT3_YEAST Ubiquitin-like protein SMT3 OS=Saccharomyces cerevisiae (strain ATCC 204508 / S288c) GN=SMT3 PE=1 SV=1	64.282	true	2	11597	3	3	4	4	3	3	4	7656411	7656411
77089	DID2_YEAST	DID2	sp|P69771|DID2_YEAST Vacuolar protein-sorting-associated protein 46 OS=Saccharomyces cerevisiae (strain ATCC 204508 / S288c) GN=DID2 PE=1 SV=1	18.631	true	2	23091	1	1	1	1	1	1	1	770758	770758
77090	VPS60_YEAST	VPS60	sp|Q03390|VPS60_YEAST Vacuolar protein-sorting-associated protein 60 OS=Saccharomyces cerevisiae (strain ATCC 204508 / S288c) GN=VPS60 PE=1 SV=2	132.103	true	2	25862	3	3	3	3	3	3	3	1801081	1801081
77091	PPID_YEAST	CPR6	sp|P53691|PPID_YEAST Peptidyl-prolyl cis-trans isomerase CPR6 OS=Saccharomyces cerevisiae (strain ATCC 204508 / S288c) GN=CPR6 PE=1 SV=1	23.911	true	2	42072	1	1	1	1	1	1	1	394909	394909
77092	PCKA_YEAST	PCK1	sp|P10963|PCKA_YEAST Phosphoenolpyruvate carboxykinase [ATP] OS=Saccharomyces cerevisiae (strain ATCC 204508 / S288c) GN=PCK1 PE=1 SV=2	33.584	true	2	60983	1	1	1	1	1	1	1	167373	167373
77093	YD381_YEAST	YDR381C-A	sp|Q3E6R5|YD381_YEAST Uncharacterized mitochondrial outer membrane protein YDR381C-A OS=Saccharomyces cerevisiae (strain ATCC 204508 / S288c) GN=YDR381C-A PE=1 SV=1	11.553	true	2	12714	1	1	1	1	1	1	1	181238	181238
77094	SBE22_YEAS7	SBE22	sp|A6ZT11|SBE22_YEAS7 Protein SBE22 OS=Saccharomyces cerevisiae (strain YJM789) GN=SBE22 PE=3 SV=1	11.778	true	2	96397	1	1	1	1	1	1	1	186966	186966
77095	FCY1_YEAST	FCY1	sp|Q12178|FCY1_YEAST Cytosine deaminase OS=Saccharomyces cerevisiae (strain ATCC 204508 / S288c) GN=FCY1 PE=1 SV=1	22.444	true	2	17507	1	1	1	1	1	1	1	570793	570793
77096	ZDS1_YEAST	ZDS1	sp|P50111|ZDS1_YEAST Protein ZDS1 OS=Saccharomyces cerevisiae (strain ATCC 204508 / S288c) GN=ZDS1 PE=1 SV=1	11.984	true	2	103358	1	1	1	1	1	1	1	67501.3	67501.3
77097	TPO3_YEAST	TPO3	sp|Q06451|TPO3_YEAST Polyamine transporter 3 OS=Saccharomyces cerevisiae (strain ATCC 204508 / S288c) GN=TPO3 PE=1 SV=1	71.353	true	2	68066	3	3	5	5	3	3	5	3.91437e+06	3.91437e+06
77098	COX9_YEAST	COX9	sp|P07255|COX9_YEAST Cytochrome c oxidase subunit 7A OS=Saccharomyces cerevisiae (strain ATCC 204508 / S288c) GN=COX9 PE=1 SV=2	11.169	true	2	6963	1	1	1	1	1	1	1	494643	494643
77099	RS16A_YEAST	RPS16A	sp|P0CX51|RS16A_YEAST 40S ribosomal protein S16-A OS=Saccharomyces cerevisiae (strain ATCC 204508 / S288c) GN=RPS16A PE=1 SV=1	115.794	true	2	15847	4	4	4	4	4	4	4	2863805	2863805
77100	FMP16_YEAST	FMP16	sp|Q12497|FMP16_YEAST Protein FMP16, mitochondrial OS=Saccharomyces cerevisiae (strain ATCC 204508 / S288c) GN=FMP16 PE=1 SV=1	180.696	true	2	10845	11	11	18	18	11	11	15	53049952	53049952
77101	YEQ9_YEAST	YER079W	sp|P40052|YEQ9_YEAST Uncharacterized protein YER079W OS=Saccharomyces cerevisiae (strain ATCC 204508 / S288c) GN=YER079W PE=1 SV=1	46.269	true	2	23197	1	1	1	1	1	1	1	837680	837680
77103	IF5A1_YEAST	HYP2	sp|P23301|IF5A1_YEAST Eukaryotic translation initiation factor 5A-1 OS=Saccharomyces cerevisiae (strain ATCC 204508 / S288c) GN=HYP2 PE=1 SV=3	474.463	true	2	17114	12	12	21	21	12	12	16	112739552	112739552
77104	GLPK_YEAST	GUT1	sp|P32190|GLPK_YEAST Glycerol kinase OS=Saccharomyces cerevisiae (strain ATCC 204508 / S288c) GN=GUT1 PE=3 SV=1	23.538	true	2	79824	2	2	2	2	2	2	2	386998	386998
77105	ESF1_YEAST	ESF1	sp|Q06344|ESF1_YEAST Pre-rRNA-processing protein ESF1 OS=Saccharomyces cerevisiae (strain ATCC 204508 / S288c) GN=ESF1 PE=1 SV=1	17.244	true	2	72410	1	1	1	1	1	1	1	541854	541854
77106	PAN1_YEAST	PAN1	sp|P32521|PAN1_YEAST Actin cytoskeleton-regulatory complex protein PAN1 OS=Saccharomyces cerevisiae (strain ATCC 204508 / S288c) GN=PAN1 PE=1 SV=2	293.457	true	2	160267	9	9	11	11	8	8	8	3940983	3940983
77107	VATG_YEAST	VMA10	sp|P48836|VATG_YEAST V-type proton ATPase subunit G OS=Saccharomyces cerevisiae (strain ATCC 204508 / S288c) GN=VMA10 PE=1 SV=1	277.178	true	2	12713	7	7	8	8	7	7	8	37135392	37135392
77108	YOP1_YEAST	YOP1	sp|Q12402|YOP1_YEAST Protein YOP1 OS=Saccharomyces cerevisiae (strain ATCC 204508 / S288c) GN=YOP1 PE=1 SV=3	74.026	true	2	20270	4	4	4	4	4	4	4	2.94273e+06	2.94273e+06
77109	SAHH_YEAST	SAH1	sp|P39954|SAHH_YEAST Adenosylhomocysteinase OS=Saccharomyces cerevisiae (strain ATCC 204508 / S288c) GN=SAH1 PE=1 SV=1	44.744	true	2	49126	2	2	2	2	2	2	2	429000	429000
77110	TFS2_YEAST	DST1	sp|P07273|TFS2_YEAST Transcription elongation factor S-II OS=Saccharomyces cerevisiae (strain ATCC 204508 / S288c) GN=DST1 PE=1 SV=4	93.297	true	2	34843	5	5	5	5	5	5	5	3.41489e+06	3.41489e+06
77111	MAK5_YEAS7	MAK5	sp|A6ZL85|MAK5_YEAS7 ATP-dependent RNA helicase MAK5 OS=Saccharomyces cerevisiae (strain YJM789) GN=MAK5 PE=3 SV=1	11.54	true	2	86607	1	1	1	1	1	1	1	338409	338409
77112	CORO_YEAST	CRN1	sp|Q06440|CORO_YEAST Coronin-like protein OS=Saccharomyces cerevisiae (strain ATCC 204508 / S288c) GN=CRN1 PE=1 SV=1	107.735	true	2	72553	3	3	3	3	3	3	3	893767	893767
77113	ENT3_YEAST	ENT3	sp|P47160|ENT3_YEAST Epsin-3 OS=Saccharomyces cerevisiae (strain ATCC 204508 / S288c) GN=ENT3 PE=1 SV=1	172.461	true	2	45091	6	6	6	6	6	6	6	3989526	3989526
77114	TPIS_YEAST	TPI1	sp|P00942|TPIS_YEAST Triosephosphate isomerase OS=Saccharomyces cerevisiae (strain ATCC 204508 / S288c) GN=TPI1 PE=1 SV=2	13.493	true	2	26795	1	1	1	1	1	1	1	583324	583324
77115	LSB1_YEAST	LSB1	sp|P53281|LSB1_YEAST LAS seventeen-binding protein 1 OS=Saccharomyces cerevisiae (strain ATCC 204508 / S288c) GN=LSB1 PE=1 SV=1	33.081	true	2	26139	2	2	2	2	2	2	2	1.00971e+06	1.00971e+06
77116	RS6A_YEAST	RPS6A	sp|P0CX37|RS6A_YEAST 40S ribosomal protein S6-A OS=Saccharomyces cerevisiae (strain ATCC 204508 / S288c) GN=RPS6A PE=1 SV=1	329.059	true	2	26996	9	9	9	9	9	9	9	10678468	10678468
77117	MLC1_YEAST	MLC1	sp|P53141|MLC1_YEAST Myosin light chain 1 OS=Saccharomyces cerevisiae (strain ATCC 204508 / S288c) GN=MLC1 PE=1 SV=1	406.764	true	2	16444	12	12	13	13	12	12	12	21766840	21766840
77118	SDS24_YEAS7	SDS24	sp|A6ZLF4|SDS24_YEAS7 Protein SDS24 OS=Saccharomyces cerevisiae (strain YJM789) GN=SDS24 PE=3 SV=1	55.334	true	2	57187	1	1	1	1	1	1	1	250224	250224
77119	RL16B_YEAST	RPL16B	sp|P26785|RL16B_YEAST 60S ribosomal protein L16-B OS=Saccharomyces cerevisiae (strain ATCC 204508 / S288c) GN=RPL16B PE=1 SV=3	145.802	true	2	22249	5	5	5	5	5	5	5	11476193	11476193
77120	SRC1_YEAST	SRC1	sp|Q03707|SRC1_YEAST Inner nuclear membrane protein SRC1 OS=Saccharomyces cerevisiae (strain ATCC 204508 / S288c) GN=SRC1 PE=1 SV=2	24.5	true	2	95498	1	1	1	1	1	1	1	176676	176676
77121	RPAC2_YEAST	RPC19	sp|P28000|RPAC2_YEAST DNA-directed RNA polymerases I and III subunit RPAC2 OS=Saccharomyces cerevisiae (strain ATCC 204508 / S288c) GN=RPC19 PE=1 SV=1	243.247	true	2	16151	6	6	9	9	5	5	6	4.85928e+06	4.85928e+06
77122	YKT6_YEAST	YKT6	sp|P36015|YKT6_YEAST Synaptobrevin homolog YKT6 OS=Saccharomyces cerevisiae (strain ATCC 204508 / S288c) GN=YKT6 PE=1 SV=1	18.639	true	2	22707	2	2	2	2	2	2	2	588205	588205
77123	CALM_YEAST	CMD1	sp|P06787|CALM_YEAST Calmodulin OS=Saccharomyces cerevisiae (strain ATCC 204508 / S288c) GN=CMD1 PE=1 SV=1	91.919	true	2	16135	2	2	2	2	2	2	2	1424844	1424844
77124	VHS2_YEAST	VHS2	sp|P40463|VHS2_YEAST Protein VHS2 OS=Saccharomyces cerevisiae (strain ATCC 204508 / S288c) GN=VHS2 PE=1 SV=1	149.712	true	2	47961	4	4	4	4	4	4	4	1323156	1323156
77125	RSC7_YEAST	NPL6	sp|P32832|RSC7_YEAST Chromatin structure-remodeling complex subunit RSC7 OS=Saccharomyces cerevisiae (strain ATCC 204508 / S288c) GN=NPL6 PE=1 SV=1	26.862	true	2	49651	1	1	1	1	1	1	1	173834	173834
77126	RS27B_YEAST	RPS27B	sp|P38711|RS27B_YEAST 40S ribosomal protein S27-B OS=Saccharomyces cerevisiae (strain ATCC 204508 / S288c) GN=RPS27B PE=1 SV=1	92.084	true	2	8865	4	4	4	4	4	4	4	13417464	13417464
77127	FKBP3_YEAST	FPR3	sp|P38911|FKBP3_YEAST FK506-binding nuclear protein OS=Saccharomyces cerevisiae (strain ATCC 204508 / S288c) GN=FPR3 PE=1 SV=2	200.925	true	2	46553	6	5	6	5	6	6	6	13315234	13315234
77128	FKBP4_YEAST	FPR4	sp|Q06205|FKBP4_YEAST FK506-binding protein 4 OS=Saccharomyces cerevisiae (strain ATCC 204508 / S288c) GN=FPR4 PE=1 SV=1	74.328	true	2	43903	3	2	3	2	3	3	3	5152498	5152498
77129	QCR8_YEAST	QCR8	sp|P08525|QCR8_YEAST Cytochrome b-c1 complex subunit 8 OS=Saccharomyces cerevisiae (strain ATCC 204508 / S288c) GN=QCR8 PE=1 SV=2	45.556	true	2	10975	1	1	1	1	1	1	1	255079	255079
77130	TMA16_YEAST	TMA16	sp|Q08687|TMA16_YEAST Translation machinery-associated protein 16 OS=Saccharomyces cerevisiae (strain ATCC 204508 / S288c) GN=TMA16 PE=1 SV=2	12.134	true	2	20839	1	1	1	1	1	1	1	419522	419522
77131	RLA0_YEAST	RPP0	sp|P05317|RLA0_YEAST 60S acidic ribosomal protein P0 OS=Saccharomyces cerevisiae (strain ATCC 204508 / S288c) GN=RPP0 PE=1 SV=2	81.365	true	2	33717	3	3	3	3	3	3	3	3.31651e+06	3.31651e+06
77132	VNX1_YEAST	VNX1	sp|P42839|VNX1_YEAST Low affinity vacuolar monovalent cation/H(+) antiporter OS=Saccharomyces cerevisiae (strain ATCC 204508 / S288c) GN=VNX1 PE=1 SV=1	28.886	true	2	102499	2	2	2	2	2	2	2	383992	383992
77133	SEC17_YEAST	SEC17	sp|P32602|SEC17_YEAST Alpha-soluble NSF attachment protein OS=Saccharomyces cerevisiae (strain ATCC 204508 / S288c) GN=SEC17 PE=1 SV=4	38.037	true	2	32803	1	1	1	1	1	1	1	137437	137437
77134	REB1_YEAST	REB1	sp|P21538|REB1_YEAST DNA-binding protein REB1 OS=Saccharomyces cerevisiae (strain ATCC 204508 / S288c) GN=REB1 PE=1 SV=2	17.285	true	2	91874	1	1	1	1	1	1	1	59820.4	59820.4
77135	SPB1_YEAST	SPB1	sp|P25582|SPB1_YEAST 27S pre-rRNA (guanosine(2922)-2'-O)-methyltransferase OS=Saccharomyces cerevisiae (strain ATCC 204508 / S288c) GN=SPB1 PE=1 SV=2	21.684	true	2	96485	3	3	3	3	3	3	3	1.08197e+06	1.08197e+06
77136	GLT1_YEAST	GLT1	sp|Q12680|GLT1_YEAST Glutamate synthase [NADH] OS=Saccharomyces cerevisiae (strain ATCC 204508 / S288c) GN=GLT1 PE=1 SV=2	11.863	true	2	238102	1	1	1	1	1	1	1	157100	157100
77137	BFR2_YEAST	BFR2	sp|Q06631|BFR2_YEAST Protein BFR2 OS=Saccharomyces cerevisiae (strain ATCC 204508 / S288c) GN=BFR2 PE=1 SV=1	51.765	true	2	61203	2	2	2	2	2	2	2	919189	919189
77138	IWS1_YEAST	SPN1	sp|Q06505|IWS1_YEAST Transcription factor SPN1 OS=Saccharomyces cerevisiae (strain ATCC 204508 / S288c) GN=SPN1 PE=1 SV=1	103.315	true	2	46082	4	4	4	4	4	4	4	741409	741409
77139	DDR48_YEAST	DDR48	sp|P18899|DDR48_YEAST Stress protein DDR48 OS=Saccharomyces cerevisiae (strain ATCC 204508 / S288c) GN=DDR48 PE=1 SV=4	80.977	true	2	46233	3	3	4	4	3	3	3	1.673e+06	1.673e+06
77140	MED19_YEAST	ROX3	sp|P25046|MED19_YEAST Mediator of RNA polymerase II transcription subunit 19 OS=Saccharomyces cerevisiae (strain ATCC 204508 / S288c) GN=ROX3 PE=1 SV=3	19.054	true	2	24857	1	1	1	1	1	1	1	449932	449932
77141	PT100_YEAST	PET100	sp|P38958|PT100_YEAST Protein PET100, mitochondrial OS=Saccharomyces cerevisiae (strain ATCC 204508 / S288c) GN=PET100 PE=1 SV=1	17.35	true	2	13188	1	1	1	1	1	1	1	296528	296528
77142	FAS2_YEAST	FAS2	sp|P19097|FAS2_YEAST Fatty acid synthase subunit alpha OS=Saccharomyces cerevisiae (strain ATCC 204508 / S288c) GN=FAS2 PE=1 SV=2	44.585	true	2	206947	2	2	2	2	2	2	2	743883	743883
77143	RAX2_YEAST	RAX2	sp|Q12465|RAX2_YEAST Bud site selection protein RAX2 OS=Saccharomyces cerevisiae (strain ATCC 204508 / S288c) GN=RAX2 PE=1 SV=1	25.701	true	2	133959	1	1	1	1	1	1	1	188699	188699
77144	EF1A_YEAST	TEF1	sp|P02994|EF1A_YEAST Elongation factor 1-alpha OS=Saccharomyces cerevisiae (strain ATCC 204508 / S288c) GN=TEF1 PE=1 SV=1	622.539	true	2	50033	19	19	31	31	19	19	24	179535280	179535280
77147	IES2_YEAST	IES2	sp|P40154|IES2_YEAST Ino eighty subunit 2 OS=Saccharomyces cerevisiae (strain ATCC 204508 / S288c) GN=IES2 PE=1 SV=1	39.531	true	2	36154	2	2	2	2	2	2	2	848055	848055
77148	RM37_YEAST	MRPL37	sp|P36532|RM37_YEAST 54S ribosomal protein L37, mitochondrial OS=Saccharomyces cerevisiae (strain ATCC 204508 / S288c) GN=MRPL37 PE=1 SV=2	10.503	true	2	11949	1	1	1	1	1	1	1	519220	519220
77149	RS20_YEAST	RPS20	sp|P38701|RS20_YEAST 40S ribosomal protein S20 OS=Saccharomyces cerevisiae (strain ATCC 204508 / S288c) GN=RPS20 PE=1 SV=3	64.305	true	2	13907	3	3	4	4	3	3	3	4687244	4687244
77150	ESS1_YEAST	ESS1	sp|P22696|ESS1_YEAST Peptidyl-prolyl cis-trans isomerase ESS1 OS=Saccharomyces cerevisiae (strain ATCC 204508 / S288c) GN=ESS1 PE=1 SV=3	29.066	true	2	19405	1	1	1	1	1	1	1	1080263	1080263
77151	ARB1_YEAST	ARB1	sp|P40024|ARB1_YEAST ABC transporter ATP-binding protein ARB1 OS=Saccharomyces cerevisiae (strain ATCC 204508 / S288c) GN=ARB1 PE=1 SV=1	103.912	true	2	68377	3	3	3	3	3	3	3	1.95508e+06	1.95508e+06
77152	COX6_YEAST	COX6	sp|P00427|COX6_YEAST Cytochrome c oxidase subunit 6, mitochondrial OS=Saccharomyces cerevisiae (strain ATCC 204508 / S288c) GN=COX6 PE=1 SV=1	373.93	true	2	17342	8	8	13	13	8	8	10	107553048	107553048
77153	RS29A_YEAST	RPS29A	sp|P41057|RS29A_YEAST 40S ribosomal protein S29-A OS=Saccharomyces cerevisiae (strain ATCC 204508 / S288c) GN=RPS29A PE=1 SV=3	60.68	true	2	6661	3	2	5	2	3	3	4	62317624	62317624
77154	RS29B_YEAST	RPS29B	sp|P41058|RS29B_YEAST 40S ribosomal protein S29-B OS=Saccharomyces cerevisiae (strain ATCC 204508 / S288c) GN=RPS29B PE=1 SV=3	154.518	true	2	6728	5	4	10	7	5	5	8	75086000	75086000
77155	MAM3_YEAST	MAM3	sp|Q12296|MAM3_YEAST Protein MAM3 OS=Saccharomyces cerevisiae (strain ATCC 204508 / S288c) GN=MAM3 PE=1 SV=1	64.841	true	2	77712	1	1	1	1	1	1	1	389116	389116
77156	TOS1_YEAST	TOS1	sp|P38288|TOS1_YEAST Protein TOS1 OS=Saccharomyces cerevisiae (strain ATCC 204508 / S288c) GN=TOS1 PE=1 SV=1	11.581	true	2	47994	1	1	1	1	1	1	1	322480	322480
77157	ATPO_YEAST	ATP5	sp|P09457|ATPO_YEAST ATP synthase subunit 5, mitochondrial OS=Saccharomyces cerevisiae (strain ATCC 204508 / S288c) GN=ATP5 PE=1 SV=1	443.827	true	2	22814	12	12	21	21	12	12	16	47291160	47291160
77158	TCTP_YEAST	TMA19	sp|P35691|TCTP_YEAST Translationally-controlled tumor protein homolog OS=Saccharomyces cerevisiae (strain ATCC 204508 / S288c) GN=TMA19 PE=1 SV=1	172.303	true	2	18741	4	4	5	5	4	4	4	5464725	5464725
77159	PGK_YEAST	PGK1	sp|P00560|PGK_YEAST Phosphoglycerate kinase OS=Saccharomyces cerevisiae (strain ATCC 204508 / S288c) GN=PGK1 PE=1 SV=2	318.706	true	2	44738	11	11	13	13	11	11	11	11663245	11663245
77160	VATD_YEAST	VMA8	sp|P32610|VATD_YEAST V-type proton ATPase subunit D OS=Saccharomyces cerevisiae (strain ATCC 204508 / S288c) GN=VMA8 PE=1 SV=1	59.059	true	2	29194	2	2	2	2	2	2	2	2.17518e+06	2.17518e+06
77161	GIS2_YEAST	GIS2	sp|P53849|GIS2_YEAST Zinc finger protein GIS2 OS=Saccharomyces cerevisiae (strain ATCC 204508 / S288c) GN=GIS2 PE=1 SV=1	94.223	true	2	17103	4	4	5	5	4	4	4	8839508	8839508
77163	BRE5_YEAST	BRE5	sp|P53741|BRE5_YEAST UBP3-associated protein BRE5 OS=Saccharomyces cerevisiae (strain ATCC 204508 / S288c) GN=BRE5 PE=1 SV=1	17.722	true	2	57674	1	1	1	1	1	1	1	323510	323510
77164	ATPB_YEAST	ATP2	sp|P00830|ATPB_YEAST ATP synthase subunit beta, mitochondrial OS=Saccharomyces cerevisiae (strain ATCC 204508 / S288c) GN=ATP2 PE=1 SV=2	407.438	true	2	54794	13	13	15	15	13	13	14	13692725	13692725
77165	VPH1_YEAST	VPH1	sp|P32563|VPH1_YEAST V-type proton ATPase subunit a, vacuolar isoform OS=Saccharomyces cerevisiae (strain ATCC 204508 / S288c) GN=VPH1 PE=1 SV=3	12.941	true	2	95529	1	1	1	1	1	1	1	197600	197600
77166	YGK8_YEAST	YGL108C	sp|P53139|YGK8_YEAST Uncharacterized protein YGL108C OS=Saccharomyces cerevisiae (strain ATCC 204508 / S288c) GN=YGL108C PE=1 SV=1	25.567	true	2	16037	1	1	1	1	1	1	1	223161	223161
77167	CRH2_YEAST	UTR2	sp|P32623|CRH2_YEAST Probable glycosidase CRH2 OS=Saccharomyces cerevisiae (strain ATCC 204508 / S288c) GN=UTR2 PE=1 SV=3	19.597	true	2	49906	1	1	1	1	1	1	1	3.36601e+06	3.36601e+06
77168	CYPH_YEAST	CPR1	sp|P14832|CYPH_YEAST Peptidyl-prolyl cis-trans isomerase OS=Saccharomyces cerevisiae (strain ATCC 204508 / S288c) GN=CPR1 PE=1 SV=3	295.864	true	2	17391	7	7	12	12	7	7	9	34123124	34123124
77170	RL29_YEAST	RPL29	sp|P05747|RL29_YEAST 60S ribosomal protein L29 OS=Saccharomyces cerevisiae (strain ATCC 204508 / S288c) GN=RPL29 PE=1 SV=3	41.29	true	2	6669	1	1	2	2	1	1	2	4312724	4312724
77171	STM1_YEAST	STM1	sp|P39015|STM1_YEAST Suppressor protein STM1 OS=Saccharomyces cerevisiae (strain ATCC 204508 / S288c) GN=STM1 PE=1 SV=3	996.422	true	2	29995	19	19	49	49	19	19	31	226500256	226500256
77172	RL38_YEAST	RPL38	sp|P49167|RL38_YEAST 60S ribosomal protein L38 OS=Saccharomyces cerevisiae (strain ATCC 204508 / S288c) GN=RPL38 PE=1 SV=1	154.277	true	2	8827	5	5	12	12	5	5	11	28601036	28601036
77173	CY1_YEAST	CYT1	sp|P07143|CY1_YEAST Cytochrome c1, heme protein, mitochondrial OS=Saccharomyces cerevisiae (strain ATCC 204508 / S288c) GN=CYT1 PE=1 SV=1	13.709	true	2	34055	1	1	1	1	1	1	1	172667	172667
77174	BOB1_YEAST	BOI1	sp|P38041|BOB1_YEAST Protein BOB1 OS=Saccharomyces cerevisiae (strain ATCC 204508 / S288c) GN=BOI1 PE=1 SV=1	22.278	true	2	109295	1	1	1	1	1	1	1	80262.4	80262.4
77175	YG3A_YEAST	YGR130C	sp|P53278|YG3A_YEAST Uncharacterized protein YGR130C OS=Saccharomyces cerevisiae (strain ATCC 204508 / S288c) GN=YGR130C PE=1 SV=1	1002.84	true	2	92698	33	33	42	42	33	33	36	49297868	49297868
77176	LRP1_YEAST	LRP1	sp|P38801|LRP1_YEAST Exosome complex protein LRP1 OS=Saccharomyces cerevisiae (strain ATCC 204508 / S288c) GN=LRP1 PE=1 SV=1	25.747	true	2	21045	1	1	1	1	1	1	1	249250	249250
77177	RIM1_YEAST	RIM1	sp|P32445|RIM1_YEAST Single-stranded DNA-binding protein RIM1, mitochondrial OS=Saccharomyces cerevisiae (strain ATCC 204508 / S288c) GN=RIM1 PE=1 SV=1	127.425	true	2	15386	4	4	7	7	4	4	6	11573084	11573084
77178	NOP10_YEAST	NOP10	sp|Q6Q547|NOP10_YEAST H/ACA ribonucleoprotein complex subunit 3 OS=Saccharomyces cerevisiae (strain ATCC 204508 / S288c) GN=NOP10 PE=1 SV=1	115.877	true	2	6636	4	4	6	6	4	4	4	7127286	7127286
77179	RS25A_YEAST	RPS25A	sp|Q3E792|RS25A_YEAST 40S ribosomal protein S25-A OS=Saccharomyces cerevisiae (strain ATCC 204508 / S288c) GN=RPS25A PE=1 SV=1	117.585	true	2	12039	3	3	5	5	3	3	4	5680594	5680594
77180	6PGD1_YEAST	GND1	sp|P38720|6PGD1_YEAST 6-phosphogluconate dehydrogenase, decarboxylating 1 OS=Saccharomyces cerevisiae (strain ATCC 204508 / S288c) GN=GND1 PE=1 SV=1	71.819	true	2	53543	2	2	2	2	2	2	2	364623	364623
77181	MBF1_YEAST	MBF1	sp|O14467|MBF1_YEAST Multiprotein-bridging factor 1 OS=Saccharomyces cerevisiae (strain ATCC 204508 / S288c) GN=MBF1 PE=1 SV=2	400.206	true	2	16404	11	11	21	21	11	11	19	239348992	239348992
77182	UBC9_YEAST	UBC9	sp|P50623|UBC9_YEAST SUMO-conjugating enzyme UBC9 OS=Saccharomyces cerevisiae (strain ATCC 204508 / S288c) GN=UBC9 PE=1 SV=1	69.843	true	2	17911	3	3	3	3	3	3	3	2.15284e+06	2.15284e+06
77183	VDAC1_YEAST	POR1	sp|P04840|VDAC1_YEAST Mitochondrial outer membrane protein porin 1 OS=Saccharomyces cerevisiae (strain ATCC 204508 / S288c) GN=POR1 PE=1 SV=4	435.9	true	2	30428	10	10	12	12	10	10	12	22328452	22328452
77185	RL12A_YEAST	RPL12A	sp|P0CX53|RL12A_YEAST 60S ribosomal protein L12-A OS=Saccharomyces cerevisiae (strain ATCC 204508 / S288c) GN=RPL12A PE=1 SV=1	352.031	true	2	17823	6	6	10	10	6	6	8	19813466	19813466
77186	ILV5_YEAST	ILV5	sp|P06168|ILV5_YEAST Ketol-acid reductoisomerase, mitochondrial OS=Saccharomyces cerevisiae (strain ATCC 204508 / S288c) GN=ILV5 PE=1 SV=1	30.388	true	2	44368	1	1	1	1	1	1	1	315566	315566
77187	MAS5_YEAST	YDJ1	sp|P25491|MAS5_YEAST Mitochondrial protein import protein MAS5 OS=Saccharomyces cerevisiae (strain ATCC 204508 / S288c) GN=YDJ1 PE=1 SV=1	53.188	true	2	44671	2	2	2	2	2	2	2	947632	947632
77188	MXR2_YEAST	MXR2	sp|P25566|MXR2_YEAST Peptide methionine sulfoxide reductase 2 OS=Saccharomyces cerevisiae (strain ATCC 204508 / S288c) GN=MXR2 PE=1 SV=1	60.988	true	2	19279	3	3	3	3	3	3	3	2.41773e+06	2.41773e+06
77190	NHP2_YEAST	NHP2	sp|P32495|NHP2_YEAST H/ACA ribonucleoprotein complex subunit 2 OS=Saccharomyces cerevisiae (strain ATCC 204508 / S288c) GN=NHP2 PE=1 SV=2	228.766	true	2	17122	5	5	11	11	5	5	8	21855442	21855442
77192	TSA1_YEAST	TSA1	sp|P34760|TSA1_YEAST Peroxiredoxin TSA1 OS=Saccharomyces cerevisiae (strain ATCC 204508 / S288c) GN=TSA1 PE=1 SV=3	80.194	true	2	21590	2	2	2	2	2	2	2	1.20023e+06	1.20023e+06
77193	YRB2_YEAST	YRB2	sp|P40517|YRB2_YEAST Ran-specific GTPase-activating protein 2 OS=Saccharomyces cerevisiae (strain ATCC 204508 / S288c) GN=YRB2 PE=1 SV=1	15.271	true	2	36054	1	1	1	1	1	1	1	224543	224543
77194	YP148_YEAST	YPR148C	sp|Q06523|YP148_YEAST Uncharacterized protein YPR148C OS=Saccharomyces cerevisiae (strain ATCC 204508 / S288c) GN=YPR148C PE=1 SV=1	12.561	true	2	49279	1	1	1	1	1	1	1	236755	236755
77195	IST2_YEAST	IST2	sp|P38250|IST2_YEAST Increased sodium tolerance protein 2 OS=Saccharomyces cerevisiae (strain ATCC 204508 / S288c) GN=IST2 PE=1 SV=2	131.062	true	2	105854	4	4	4	4	4	4	4	6883533	6883533
77196	QCR2_YEAST	QCR2	sp|P07257|QCR2_YEAST Cytochrome b-c1 complex subunit 2, mitochondrial OS=Saccharomyces cerevisiae (strain ATCC 204508 / S288c) GN=QCR2 PE=1 SV=1	174.785	true	2	40478	7	7	8	8	7	7	7	5968910	5968910
77197	RS5_YEAST	RPS5	sp|P26783|RS5_YEAST 40S ribosomal protein S5 OS=Saccharomyces cerevisiae (strain ATCC 204508 / S288c) GN=RPS5 PE=1 SV=3	81.466	true	2	25039	2	2	2	2	2	2	2	1.04694e+06	1.04694e+06
77198	ODPX_YEAST	PDX1	sp|P16451|ODPX_YEAST Pyruvate dehydrogenase complex protein X component, mitochondrial OS=Saccharomyces cerevisiae (strain ATCC 204508 / S288c) GN=PDX1 PE=1 SV=1	81.599	true	2	45362	3	3	3	3	3	3	3	2.21088e+06	2.21088e+06
77199	RS15_YEAST	RPS15	sp|Q01855|RS15_YEAST 40S ribosomal protein S15 OS=Saccharomyces cerevisiae (strain ATCC 204508 / S288c) GN=RPS15 PE=1 SV=1	72.684	true	2	16002	3	3	5	5	3	3	3	17599860	17599860
77200	TBCA_YEAST	RBL2	sp|P48606|TBCA_YEAST Tubulin-specific chaperone A OS=Saccharomyces cerevisiae (strain ATCC 204508 / S288c) GN=RBL2 PE=1 SV=1	110.009	true	2	12379	4	4	4	4	4	4	4	5431556	5431556
77201	IF2B_YEAST	SUI3	sp|P09064|IF2B_YEAST Eukaryotic translation initiation factor 2 subunit beta OS=Saccharomyces cerevisiae (strain ATCC 204508 / S288c) GN=SUI3 PE=1 SV=2	166.45	true	2	31574	5	5	5	5	5	5	5	3891436	3891436
77202	PMM_YEAST	SEC53	sp|P07283|PMM_YEAST Phosphomannomutase OS=Saccharomyces cerevisiae (strain ATCC 204508 / S288c) GN=SEC53 PE=1 SV=1	16.794	true	2	29063	1	1	1	1	1	1	1	165970	165970
77204	WHI3_YEAST	WHI3	sp|P34761|WHI3_YEAST Protein WHI3 OS=Saccharomyces cerevisiae (strain ATCC 204508 / S288c) GN=WHI3 PE=1 SV=1	40.625	true	2	71253	1	1	1	1	1	1	1	452631	452631
77205	REG1_YEAST	REG1	sp|Q00816|REG1_YEAST Resistance to glucose repression protein 1 OS=Saccharomyces cerevisiae (strain ATCC 204508 / S288c) GN=REG1 PE=1 SV=1	34.741	true	2	112616	2	2	2	2	2	2	2	488143	488143
77206	NSR1_YEAST	NSR1	sp|P27476|NSR1_YEAST Nuclear localization sequence-binding protein OS=Saccharomyces cerevisiae (strain ATCC 204508 / S288c) GN=NSR1 PE=1 SV=1	204.074	true	2	44535	8	8	8	8	8	8	8	20427578	20427578
77207	CPYI_YEAST	TFS1	sp|P14306|CPYI_YEAST Carboxypeptidase Y inhibitor OS=Saccharomyces cerevisiae (strain ATCC 204508 / S288c) GN=TFS1 PE=1 SV=2	111.3	true	2	24357	3	3	3	3	3	3	3	1.80834e+06	1.80834e+06
77209	PEX14_YEAST	PEX14	sp|P53112|PEX14_YEAST Peroxisomal membrane protein PEX14 OS=Saccharomyces cerevisiae (strain ATCC 204508 / S288c) GN=PEX14 PE=1 SV=1	12.017	true	2	38420	1	1	1	1	1	1	1	280719	280719
77210	UIP4_YEAST	UIP4	sp|Q08926|UIP4_YEAST ULP1-interacting protein 4 OS=Saccharomyces cerevisiae (strain ATCC 204508 / S288c) GN=UIP4 PE=1 SV=1	80.97	true	2	34222	4	4	4	4	4	4	4	3.8089e+06	3.8089e+06
77211	VATA_YEAST	VMA1	sp|P17255|VATA_YEAST V-type proton ATPase catalytic subunit A OS=Saccharomyces cerevisiae (strain ATCC 204508 / S288c) GN=VMA1 PE=1 SV=3	18.65	true	2	118637	1	1	1	1	1	1	1	622498	622498
77212	IES6_YEAST	IES6	sp|P32617|IES6_YEAST Chromatin-remodeling complex subunit IES6 OS=Saccharomyces cerevisiae (strain ATCC 204508 / S288c) GN=IES6 PE=1 SV=1	10.184	true	2	18533	1	1	1	1	1	1	1	169730	169730
77213	HEL2_YEAST	HEL2	sp|Q05580|HEL2_YEAST E3 ubiquitin-protein ligase HEL2 OS=Saccharomyces cerevisiae (strain ATCC 204508 / S288c) GN=HEL2 PE=1 SV=1	25.544	true	2	72756	2	2	2	2	2	2	2	821841	821841
77214	GGA2_YEAST	GGA2	sp|P38817|GGA2_YEAST ADP-ribosylation factor-binding protein GGA2 OS=Saccharomyces cerevisiae (strain ATCC 204508 / S288c) GN=GGA2 PE=1 SV=1	21.409	true	2	64347	1	1	1	1	1	1	1	98030.4	98030.4
77215	RLA4_YEAST	RPP2B	sp|P02400|RLA4_YEAST 60S acidic ribosomal protein P2-beta OS=Saccharomyces cerevisiae (strain ATCC 204508 / S288c) GN=RPP2B PE=1 SV=2	199.384	true	2	11050	5	5	7	7	5	5	6	8.22201e+06	8.22201e+06
77216	ISU1_YEAST	ISU1	sp|Q03020|ISU1_YEAST Iron sulfur cluster assembly protein 1, mitochondrial OS=Saccharomyces cerevisiae (strain ATCC 204508 / S288c) GN=ISU1 PE=1 SV=1	23.825	true	2	17895	1	1	1	1	1	1	1	660705	660705
77217	RHO1_YEAST	RHO1	sp|P06780|RHO1_YEAST GTP-binding protein RHO1 OS=Saccharomyces cerevisiae (strain ATCC 204508 / S288c) GN=RHO1 PE=1 SV=3	64.46	true	2	23152	2	2	2	2	1	1	1	858668	858668
77218	IXR1_YEAST	IXR1	sp|P33417|IXR1_YEAST Intrastrand cross-link recognition protein OS=Saccharomyces cerevisiae (strain ATCC 204508 / S288c) GN=IXR1 PE=1 SV=2	21.078	true	2	67856	1	1	1	1	1	1	1	308767	308767
77219	NUP60_YEAST	NUP60	sp|P39705|NUP60_YEAST Nucleoporin NUP60 OS=Saccharomyces cerevisiae (strain ATCC 204508 / S288c) GN=NUP60 PE=1 SV=1	219.262	true	2	59039	6	6	6	6	6	6	6	2.61683e+06	2.61683e+06
77220	SKG3_YEAST	SKG3	sp|Q06315|SKG3_YEAST Protein SKG3 OS=Saccharomyces cerevisiae (strain ATCC 204508 / S288c) GN=SKG3 PE=1 SV=1	29.356	true	2	114111	1	1	1	1	1	1	1	235905	235905
77221	FUN30_YEAST	FUN30	sp|P31380|FUN30_YEAST ATP-dependent helicase FUN30 OS=Saccharomyces cerevisiae (strain ATCC 204508 / S288c) GN=FUN30 PE=1 SV=1	48.444	true	2	128507	1	1	1	1	1	1	1	110691	110691
77222	T2FA_YEAST	TFG1	sp|P41895|T2FA_YEAST Transcription initiation factor IIF subunit alpha OS=Saccharomyces cerevisiae (strain ATCC 204508 / S288c) GN=TFG1 PE=1 SV=2	69.544	true	2	82194	3	3	3	3	3	3	3	908068	908068
77223	NHP6A_YEAST	NHP6A	sp|P11632|NHP6A_YEAST Non-histone chromosomal protein 6A OS=Saccharomyces cerevisiae (strain ATCC 204508 / S288c) GN=NHP6A PE=1 SV=1	231.719	true	2	10802	6	6	9	9	6	6	7	12882320	12882320
77224	MSC3_YEAST	MSC3	sp|Q05812|MSC3_YEAST Meiotic sister-chromatid recombination protein 3 OS=Saccharomyces cerevisiae (strain ATCC 204508 / S288c) GN=MSC3 PE=1 SV=1	305.083	true	2	80530	8	8	9	9	8	8	8	9355974	9355974
77225	GPDM_YEAST	GUT2	sp|P32191|GPDM_YEAST Glycerol-3-phosphate dehydrogenase, mitochondrial OS=Saccharomyces cerevisiae (strain ATCC 204508 / S288c) GN=GUT2 PE=1 SV=2	88.213	true	2	72389	3	3	3	3	3	3	3	1.01476e+06	1.01476e+06
77227	STE20_YEAST	STE20	sp|Q03497|STE20_YEAST Serine/threonine-protein kinase STE20 OS=Saccharomyces cerevisiae (strain ATCC 204508 / S288c) GN=STE20 PE=1 SV=1	14.741	true	2	102362	1	1	1	1	1	1	1	188018	188018
77228	HCH1_YEAST	HCH1	sp|P53834|HCH1_YEAST Hsp90 co-chaperone HCH1 OS=Saccharomyces cerevisiae (strain ATCC 204508 / S288c) GN=HCH1 PE=1 SV=1	39.107	true	2	17246	2	2	2	2	2	2	2	204750	204750
77229	TAL1_YEAST	TAL1	sp|P15019|TAL1_YEAST Transaldolase OS=Saccharomyces cerevisiae (strain ATCC 204508 / S288c) GN=TAL1 PE=1 SV=4	237.182	true	2	37036	7	7	7	7	6	6	6	4231707	4231707
77230	ARC1_YEAST	ARC1	sp|P46672|ARC1_YEAST tRNA-aminoacylation cofactor ARC1 OS=Saccharomyces cerevisiae (strain ATCC 204508 / S288c) GN=ARC1 PE=1 SV=2	14.45	true	2	42084	1	1	1	1	1	1	1	684052	684052
77231	CAJ1_YEAST	CAJ1	sp|P39101|CAJ1_YEAST Protein CAJ1 OS=Saccharomyces cerevisiae (strain ATCC 204508 / S288c) GN=CAJ1 PE=1 SV=1	201.593	true	2	44855	7	7	7	7	7	7	7	6.88724e+06	6.88724e+06
77232	MDM38_YEAST	MDM38	sp|Q08179|MDM38_YEAST Mitochondrial distribution and morphology protein 38 OS=Saccharomyces cerevisiae (strain ATCC 204508 / S288c) GN=MDM38 PE=1 SV=1	205.406	true	2	65005	7	7	7	7	7	7	7	7.40012e+06	7.40012e+06
77233	IMA1_YEAST	SRP1	sp|Q02821|IMA1_YEAST Importin subunit alpha OS=Saccharomyces cerevisiae (strain ATCC 204508 / S288c) GN=SRP1 PE=1 SV=1	22.438	true	2	60441	1	1	1	1	1	1	1	861526	861526
77234	PNC1_YEAST	PNC1	sp|P53184|PNC1_YEAST Nicotinamidase OS=Saccharomyces cerevisiae (strain ATCC 204508 / S288c) GN=PNC1 PE=1 SV=1	19.306	true	2	24993	1	1	1	1	1	1	1	364857	364857
77235	YG4D_YEAST	YGR201C	sp|P42936|YG4D_YEAST Putative elongation factor 1 gamma homolog OS=Saccharomyces cerevisiae (strain ATCC 204508 / S288c) GN=YGR201C PE=4 SV=3	106.697	true	2	26297	3	3	3	3	3	3	3	1.20673e+06	1.20673e+06
77236	RL9A_YEAST	RPL9A	sp|P05738|RL9A_YEAST 60S ribosomal protein L9-A OS=Saccharomyces cerevisiae (strain ATCC 204508 / S288c) GN=RPL9A PE=1 SV=2	99.173	true	2	21569	4	4	5	5	4	4	5	2.55167e+06	2.55167e+06
77237	NAB2_YEAST	NAB2	sp|P32505|NAB2_YEAST Nuclear polyadenylated RNA-binding protein NAB2 OS=Saccharomyces cerevisiae (strain ATCC 204508 / S288c) GN=NAB2 PE=1 SV=1	12.368	true	2	58321	1	1	1	1	1	1	1	289487	289487
77238	RL17B_YEAST	RPL17B	sp|P46990|RL17B_YEAST 60S ribosomal protein L17-B OS=Saccharomyces cerevisiae (strain ATCC 204508 / S288c) GN=RPL17B PE=1 SV=2	221.123	true	2	20551	7	7	11	11	7	7	7	10973609	10973609
77239	RS12_YEAST	RPS12	sp|P48589|RS12_YEAST 40S ribosomal protein S12 OS=Saccharomyces cerevisiae (strain ATCC 204508 / S288c) GN=RPS12 PE=1 SV=1	131.313	true	2	15472	5	5	7	7	5	5	5	4645609	4645609
77240	COXM2_YEAST	CMC2	sp|Q3E7A4|COXM2_YEAST COX assembly mitochondrial protein 2 OS=Saccharomyces cerevisiae (strain ATCC 204508 / S288c) GN=CMC2 PE=1 SV=1	130.045	true	2	12947	3	3	3	3	3	3	3	3.07881e+06	3.07881e+06
77241	NOT4_YEAST	MOT2	sp|P34909|NOT4_YEAST General negative regulator of transcription subunit 4 OS=Saccharomyces cerevisiae (strain ATCC 204508 / S288c) GN=MOT2 PE=1 SV=1	11.3	true	2	65354	1	1	1	1	1	1	1	261101	261101
77242	MED3_YEAST	PGD1	sp|P40356|MED3_YEAST Mediator of RNA polymerase II transcription subunit 3 OS=Saccharomyces cerevisiae (strain ATCC 204508 / S288c) GN=PGD1 PE=1 SV=2	10.447	true	2	43079	1	1	1	1	1	1	1	211889	211889
77243	FAT2_YEAST	PCS60	sp|P38137|FAT2_YEAST Peroxisomal-coenzyme A synthetase OS=Saccharomyces cerevisiae (strain ATCC 204508 / S288c) GN=PCS60 PE=1 SV=1	18.603	true	2	60489	1	1	1	1	1	1	1	979464	979464
77244	RS7B_YEAST	RPS7B	sp|P48164|RS7B_YEAST 40S ribosomal protein S7-B OS=Saccharomyces cerevisiae (strain ATCC 204508 / S288c) GN=RPS7B PE=1 SV=1	19.199	true	2	21634	2	2	2	2	2	2	2	656417	656417
77245	TBF1_YEAST	TBF1	sp|Q02457|TBF1_YEAST Protein TBF1 OS=Saccharomyces cerevisiae (strain ATCC 204508 / S288c) GN=TBF1 PE=1 SV=2	49.144	true	2	62824	2	2	2	2	2	2	2	596371	596371
77246	NAP1_YEAST	NAP1	sp|P25293|NAP1_YEAST Nucleosome assembly protein OS=Saccharomyces cerevisiae (strain ATCC 204508 / S288c) GN=NAP1 PE=1 SV=2	62.347	true	2	47885	1	1	1	1	1	1	1	299256	299256
77247	TPM2_YEAST	TPM2	sp|P40414|TPM2_YEAST Tropomyosin-2 OS=Saccharomyces cerevisiae (strain ATCC 204508 / S288c) GN=TPM2 PE=1 SV=1	91.979	true	2	19093	3	3	3	3	3	3	3	3.07768e+06	3.07768e+06
77248	KRI1_YEAST	KRI1	sp|P42846|KRI1_YEAST Protein KRI1 OS=Saccharomyces cerevisiae (strain ATCC 204508 / S288c) GN=KRI1 PE=1 SV=1	303.074	true	2	68654	10	10	10	10	10	10	10	5.62982e+06	5.62982e+06
77249	SLM1_YEAST	SLM1	sp|P40485|SLM1_YEAST Phosphatidylinositol 4,5-bisphosphate-binding protein SLM1 OS=Saccharomyces cerevisiae (strain ATCC 204508 / S288c) GN=SLM1 PE=1 SV=1	28.384	true	2	77995	2	2	2	2	2	2	2	296661	296661
77250	TAF10_YEAST	TAF10	sp|Q12030|TAF10_YEAST Transcription initiation factor TFIID subunit 10 OS=Saccharomyces cerevisiae (strain ATCC 204508 / S288c) GN=TAF10 PE=1 SV=1	21.512	true	2	23019	2	2	2	2	2	2	2	540058	540058
77251	HRK1_YEAST	HRK1	sp|Q08732|HRK1_YEAST Serine/threonine-protein kinase HRK1 OS=Saccharomyces cerevisiae (strain ATCC 204508 / S288c) GN=HRK1 PE=1 SV=1	45.972	true	2	85696	2	2	2	2	2	2	2	1086831	1086831
77252	ESF2_YEAST	ESF2	sp|P53743|ESF2_YEAST Pre-rRNA-processing protein ESF2 OS=Saccharomyces cerevisiae (strain ATCC 204508 / S288c) GN=ESF2 PE=1 SV=1	39.59	true	2	36408	1	1	1	1	1	1	1	888100	888100
77253	PLB1_YEAST	PLB1	sp|P39105|PLB1_YEAST Lysophospholipase 1 OS=Saccharomyces cerevisiae (strain ATCC 204508 / S288c) GN=PLB1 PE=1 SV=2	291.581	true	2	71667	9	9	14	14	9	9	11	31842822	31842822
77254	ODPA_YEAST	PDA1	sp|P16387|ODPA_YEAST Pyruvate dehydrogenase E1 component subunit alpha, mitochondrial OS=Saccharomyces cerevisiae (strain ATCC 204508 / S288c) GN=PDA1 PE=1 SV=2	118.003	true	2	46343	3	3	3	3	3	3	3	1.49054e+06	1.49054e+06
77255	SNF7_YEAST	SNF7	sp|P39929|SNF7_YEAST Vacuolar-sorting protein SNF7 OS=Saccharomyces cerevisiae (strain ATCC 204508 / S288c) GN=SNF7 PE=1 SV=1	121.916	true	2	26987	4	4	5	5	4	4	5	2.75125e+06	2.75125e+06
77256	RS2_YEAST	RPS2	sp|P25443|RS2_YEAST 40S ribosomal protein S2 OS=Saccharomyces cerevisiae (strain ATCC 204508 / S288c) GN=RPS2 PE=1 SV=3	43.478	true	2	27450	3	3	3	3	3	3	3	1.37683e+06	1.37683e+06
77257	YPK1_YEAST	YPK1	sp|P12688|YPK1_YEAST Serine/threonine-protein kinase YPK1 OS=Saccharomyces cerevisiae (strain ATCC 204508 / S288c) GN=YPK1 PE=1 SV=2	114.469	true	2	76480	3	3	3	3	3	3	3	1.07702e+06	1.07702e+06
77258	RL21A_YEAST	RPL21A	sp|Q02753|RL21A_YEAST 60S ribosomal protein L21-A OS=Saccharomyces cerevisiae (strain ATCC 204508 / S288c) GN=RPL21A PE=1 SV=1	74.498	true	2	18242	3	3	3	3	3	3	3	3091356	3091356
77259	ABF1_YEAST	ABF1	sp|P14164|ABF1_YEAST ARS-binding factor 1 OS=Saccharomyces cerevisiae (strain ATCC 204508 / S288c) GN=ABF1 PE=1 SV=4	20.481	true	2	81753	2	2	2	2	2	2	2	578530	578530
77260	YD19A_YEAST	YDR119W-A	sp|Q2V2P9|YD19A_YEAST Uncharacterized protein YDR119W-A OS=Saccharomyces cerevisiae (strain ATCC 204508 / S288c) GN=YDR119W-A PE=4 SV=1	38.82	true	2	7452	1	1	1	1	1	1	1	540471	540471
77261	ACPM_YEAST	ACP1	sp|P32463|ACPM_YEAST Acyl carrier protein, mitochondrial OS=Saccharomyces cerevisiae (strain ATCC 204508 / S288c) GN=ACP1 PE=1 SV=1	69.953	true	2	13943	2	2	3	3	2	2	2	3.36396e+06	3.36396e+06
77262	RL32_YEAST	RPL32	sp|P38061|RL32_YEAST 60S ribosomal protein L32 OS=Saccharomyces cerevisiae (strain ATCC 204508 / S288c) GN=RPL32 PE=1 SV=1	27.879	true	2	14771	1	1	1	1	1	1	1	225848	225848
77263	RL39_YEAST	RPL39	sp|P04650|RL39_YEAST 60S ribosomal protein L39 OS=Saccharomyces cerevisiae (strain ATCC 204508 / S288c) GN=RPL39 PE=1 SV=3	43.36	true	2	6342	3	3	5	5	3	3	4	33137712	33137712
77264	RRP15_YEAST	RRP15	sp|Q06511|RRP15_YEAST Ribosomal RNA-processing protein 15 OS=Saccharomyces cerevisiae (strain ATCC 204508 / S288c) GN=RRP15 PE=1 SV=1	35.961	true	2	28212	2	2	2	2	2	2	2	28876988	28876988
77265	RM34_YEAST	YDR115W	sp|Q04598|RM34_YEAST 54S ribosomal protein L34, mitochondrial OS=Saccharomyces cerevisiae (strain ATCC 204508 / S288c) GN=YDR115W PE=1 SV=1	16.71	true	2	12030	1	1	1	1	1	1	1	699496	699496
77266	EFTU_YEAST	TUF1	sp|P02992|EFTU_YEAST Elongation factor Tu, mitochondrial OS=Saccharomyces cerevisiae (strain ATCC 204508 / S288c) GN=TUF1 PE=1 SV=1	35.256	true	2	47972	2	2	2	2	2	2	2	1230795	1230795
77267	OM45_YEAST	OM45	sp|P16547|OM45_YEAST Mitochondrial outer membrane protein OM45 OS=Saccharomyces cerevisiae (strain ATCC 204508 / S288c) GN=OM45 PE=1 SV=2	1486.85	true	2	44580	40	40	62	62	39	39	50	185336752	185336752
77268	HER1_YEAST	HER1	sp|Q12276|HER1_YEAST HMG2-induced ER-remodeling protein 1 OS=Saccharomyces cerevisiae (strain ATCC 204508 / S288c) GN=HER1 PE=1 SV=1	26.444	true	2	139458	2	2	2	2	2	2	2	624309	624309
77269	RL10_YEAST	RPL10	sp|P41805|RL10_YEAST 60S ribosomal protein L10 OS=Saccharomyces cerevisiae (strain ATCC 204508 / S288c) GN=RPL10 PE=1 SV=1	139.878	true	2	25361	4	4	4	4	4	4	4	4691471	4691471
77270	GLRX5_YEAST	GRX5	sp|Q02784|GLRX5_YEAST Monothiol glutaredoxin-5, mitochondrial OS=Saccharomyces cerevisiae (strain ATCC 204508 / S288c) GN=GRX5 PE=1 SV=1	55.2	true	2	16931	1	1	1	1	1	1	1	310350	310350
77271	PRS7_YEAST	RPT1	sp|P33299|PRS7_YEAST 26S protease regulatory subunit 7 homolog OS=Saccharomyces cerevisiae (strain ATCC 204508 / S288c) GN=RPT1 PE=1 SV=1	58.845	true	2	51983	2	2	3	3	2	2	2	1686672	1686672
77272	YPT1_YEAST	YPT1	sp|P01123|YPT1_YEAST GTP-binding protein YPT1 OS=Saccharomyces cerevisiae (strain ATCC 204508 / S288c) GN=YPT1 PE=1 SV=2	38.928	true	2	23214	1	1	1	1	1	1	1	171923	171923
77273	YL363_YEAST	YLR363W-A	sp|Q3E747|YL363_YEAST Uncharacterized protein YLR363W-A OS=Saccharomyces cerevisiae (strain ATCC 204508 / S288c) GN=YLR363W-A PE=1 SV=1	17.497	true	2	9738	1	1	1	1	1	1	1	172341	172341
77274	SRO9_YEAST	SRO9	sp|P25567|SRO9_YEAST RNA-binding protein SRO9 OS=Saccharomyces cerevisiae (strain ATCC 204508 / S288c) GN=SRO9 PE=1 SV=2	183.196	true	2	48060	5	5	5	5	5	5	5	3995750	3995750
77275	MIC19_YEAST	MIC19	sp|P43594|MIC19_YEAST MICOS complex subunit MIC19 OS=Saccharomyces cerevisiae (strain ATCC 204508 / S288c) GN=MIC19 PE=1 SV=1	153.291	true	2	18855	5	5	9	9	5	5	8	6911168	6911168
77276	FIMB_YEAST	SAC6	sp|P32599|FIMB_YEAST Fimbrin OS=Saccharomyces cerevisiae (strain ATCC 204508 / S288c) GN=SAC6 PE=1 SV=1	124.056	true	2	71773	2	2	2	2	2	2	2	1.30906e+06	1.30906e+06
77277	ESC1_YEAST	ESC1	sp|Q03661|ESC1_YEAST Silent chromatin protein ESC1 OS=Saccharomyces cerevisiae (strain ATCC 204508 / S288c) GN=ESC1 PE=1 SV=1	25.381	true	2	187138	1	1	2	2	1	1	1	538043	538043
77278	ERF3_YEAST	SUP35	sp|P05453|ERF3_YEAST Eukaryotic peptide chain release factor GTP-binding subunit OS=Saccharomyces cerevisiae (strain ATCC 204508 / S288c) GN=SUP35 PE=1 SV=1	68.332	true	2	76551	2	2	2	2	2	2	2	4.12387e+06	4.12387e+06
77279	QCR10_YEAST	QCR10	sp|P37299|QCR10_YEAST Cytochrome b-c1 complex subunit 10 OS=Saccharomyces cerevisiae (strain ATCC 204508 / S288c) GN=QCR10 PE=1 SV=2	20.355	true	2	8593	1	1	1	1	1	1	1	1.02176e+06	1.02176e+06
77281	RNA15_YEAST	RNA15	sp|P25299|RNA15_YEAST mRNA 3'-end-processing protein RNA15 OS=Saccharomyces cerevisiae (strain ATCC 204508 / S288c) GN=RNA15 PE=1 SV=1	36.425	true	2	32791	1	1	1	1	1	1	1	82432.4	82432.4
77282	TRX2_YEAST	TRX2	sp|P22803|TRX2_YEAST Thioredoxin-2 OS=Saccharomyces cerevisiae (strain ATCC 204508 / S288c) GN=TRX2 PE=1 SV=3	286.155	true	2	11204	7	4	7	4	7	7	7	32088460	32088460
77283	TRX1_YEAST	TRX1	sp|P22217|TRX1_YEAST Thioredoxin-1 OS=Saccharomyces cerevisiae (strain ATCC 204508 / S288c) GN=TRX1 PE=1 SV=3	138.743	true	2	11235	4	1	4	1	4	4	4	24556776	24556776
77284	RL13B_YEAST	RPL13B	sp|P40212|RL13B_YEAST 60S ribosomal protein L13-B OS=Saccharomyces cerevisiae (strain ATCC 204508 / S288c) GN=RPL13B PE=1 SV=1	375.949	true	2	22525	10	10	15	15	10	10	14	54569664	54569664
77285	SDHB_YEAST	SDH2	sp|P21801|SDHB_YEAST Succinate dehydrogenase [ubiquinone] iron-sulfur subunit, mitochondrial OS=Saccharomyces cerevisiae (strain ATCC 204508 / S288c) GN=SDH2 PE=1 SV=1	65.444	true	2	30231	2	2	2	2	2	2	2	1100547	1100547
77286	SHS1_YEAST	SHS1	sp|Q07657|SHS1_YEAST Seventh homolog of septin 1 OS=Saccharomyces cerevisiae (strain ATCC 204508 / S288c) GN=SHS1 PE=1 SV=1	11.572	true	2	62630	1	1	1	1	1	1	1	193110	193110
77287	FMP10_YEAST	FMP10	sp|P40098|FMP10_YEAST Uncharacterized mitochondrial membrane protein FMP10 OS=Saccharomyces cerevisiae (strain ATCC 204508 / S288c) GN=FMP10 PE=1 SV=1	12.635	true	2	27698	1	1	1	1	1	1	1	457963	457963
77288	RL34A_YEAST	RPL34A	sp|P87262|RL34A_YEAST 60S ribosomal protein L34-A OS=Saccharomyces cerevisiae (strain ATCC 204508 / S288c) GN=RPL34A PE=1 SV=1	35.713	true	2	13639	2	2	2	2	2	2	2	4202643	4202643
77289	RTN1_YEAST	RTN1	sp|Q04947|RTN1_YEAST Reticulon-like protein 1 OS=Saccharomyces cerevisiae (strain ATCC 204508 / S288c) GN=RTN1 PE=1 SV=1	251.519	true	2	32916	8	8	13	13	8	8	12	70460688	70460688
77290	RPA14_YEAST	RPA14	sp|P50106|RPA14_YEAST DNA-directed RNA polymerase I subunit RPA14 OS=Saccharomyces cerevisiae (strain ATCC 204508 / S288c) GN=RPA14 PE=1 SV=1	19.128	true	2	14585	2	2	2	2	2	2	2	723615	723615
77291	PHSG_YEAST	GPH1	sp|P06738|PHSG_YEAST Glycogen phosphorylase OS=Saccharomyces cerevisiae (strain ATCC 204508 / S288c) GN=GPH1 PE=1 SV=4	20.452	true	2	103275	1	1	1	1	1	1	1	679466	679466
77292	PSS_YEAST	CHO1	sp|P08456|PSS_YEAST CDP-diacylglycerol--serine O-phosphatidyltransferase OS=Saccharomyces cerevisiae (strain ATCC 204508 / S288c) GN=CHO1 PE=1 SV=3	10.109	true	2	30805	1	1	1	1	1	1	1	170425	170425
77293	SNQ2_YEAST	SNQ2	sp|P32568|SNQ2_YEAST Protein SNQ2 OS=Saccharomyces cerevisiae (strain ATCC 204508 / S288c) GN=SNQ2 PE=1 SV=2	26.961	true	2	168767	1	1	1	1	1	1	1	328270	328270
77294	ATP14_YEAST	ATP14	sp|Q12349|ATP14_YEAST ATP synthase subunit H, mitochondrial OS=Saccharomyces cerevisiae (strain ATCC 204508 / S288c) GN=ATP14 PE=1 SV=1	79.644	true	2	14128	1	1	2	2	1	1	1	7269442	7269442
77295	CBP6_YEAST	CBP6	sp|P07253|CBP6_YEAST Cytochrome B pre-mRNA-processing protein 6 OS=Saccharomyces cerevisiae (strain ATCC 204508 / S288c) GN=CBP6 PE=1 SV=1	122.361	true	2	18679	4	4	4	4	4	4	4	1.95137e+06	1.95137e+06
77296	BUD21_YEAST	BUD21	sp|Q08492|BUD21_YEAST Bud site selection protein 21 OS=Saccharomyces cerevisiae (strain ATCC 204508 / S288c) GN=BUD21 PE=1 SV=1	30.075	true	2	24385	2	2	2	2	2	2	2	1.9113e+06	1.9113e+06
77297	GPA2_YEAST	GPA2	sp|P10823|GPA2_YEAST Guanine nucleotide-binding protein alpha-2 subunit OS=Saccharomyces cerevisiae (strain ATCC 204508 / S288c) GN=GPA2 PE=1 SV=2	12.932	true	2	50448	1	1	1	1	1	1	1	164998	164998
77298	HSP12_YEAST	HSP12	sp|P22943|HSP12_YEAST 12 kDa heat shock protein OS=Saccharomyces cerevisiae (strain ATCC 204508 / S288c) GN=HSP12 PE=1 SV=1	410.37	true	2	11693	5	5	25	25	5	5	19	355346112	355346112
77299	RM40_YEAST	MRPL40	sp|P36534|RM40_YEAST 54S ribosomal protein L40, mitochondrial OS=Saccharomyces cerevisiae (strain ATCC 204508 / S288c) GN=MRPL40 PE=1 SV=2	175.625	true	2	33751	4	4	4	4	4	4	4	3317474	3317474
77300	DSK2_YEAST	DSK2	sp|P48510|DSK2_YEAST Ubiquitin domain-containing protein DSK2 OS=Saccharomyces cerevisiae (strain ATCC 204508 / S288c) GN=DSK2 PE=1 SV=2	34.74	true	2	39346	2	2	2	2	2	2	2	3.54014e+06	3.54014e+06
77301	YHP7_YEAST	YHR097C	sp|P38809|YHP7_YEAST Uncharacterized protein YHR097C OS=Saccharomyces cerevisiae (strain ATCC 204508 / S288c) GN=YHR097C PE=1 SV=1	326.887	true	2	40663	9	9	11	11	8	8	9	11333095	11333095
77302	RDL2_YEAST	RDL2	sp|Q08742|RDL2_YEAST Thiosulfate sulfurtransferase RDL2, mitochondrial OS=Saccharomyces cerevisiae (strain ATCC 204508 / S288c) GN=RDL2 PE=1 SV=1	99.413	true	2	16697	3	3	3	3	3	3	3	6030031	6030031
77303	PAR32_YEAST	PAR32	sp|Q12515|PAR32_YEAST Protein PAR32 OS=Saccharomyces cerevisiae (strain ATCC 204508 / S288c) GN=PAR32 PE=1 SV=1	29.222	true	2	31886	1	1	1	1	1	1	1	745190	745190
77304	PHO88_YEAST	PHO88	sp|P38264|PHO88_YEAST Inorganic phosphate transport protein PHO88 OS=Saccharomyces cerevisiae (strain ATCC 204508 / S288c) GN=PHO88 PE=1 SV=1	12.041	true	2	21137	1	1	1	1	1	1	1	614726	614726
77305	ZEO1_YEAST	ZEO1	sp|Q08245|ZEO1_YEAST Protein ZEO1 OS=Saccharomyces cerevisiae (strain ATCC 204508 / S288c) GN=ZEO1 PE=1 SV=3	749.026	true	2	12589	17	17	31	31	17	17	25	162000240	162000240
77306	ODO1_YEAST	KGD1	sp|P20967|ODO1_YEAST 2-oxoglutarate dehydrogenase, mitochondrial OS=Saccharomyces cerevisiae (strain ATCC 204508 / S288c) GN=KGD1 PE=1 SV=2	12.828	true	2	114416	1	1	1	1	1	1	1	119594	119594
77307	SEG1_YEAST	SEG1	sp|Q04279|SEG1_YEAST Eisosome protein SEG1 OS=Saccharomyces cerevisiae (strain ATCC 204508 / S288c) GN=SEG1 PE=1 SV=1	528.102	true	2	105874	21	21	23	23	21	21	22	18147734	18147734
77308	MAM33_YEAST	MAM33	sp|P40513|MAM33_YEAST Mitochondrial acidic protein MAM33 OS=Saccharomyces cerevisiae (strain ATCC 204508 / S288c) GN=MAM33 PE=1 SV=1	27.461	true	2	30132	1	1	1	1	1	1	1	706627	706627
77309	CLC1_YEAST	CLC1	sp|P17891|CLC1_YEAST Clathrin light chain OS=Saccharomyces cerevisiae (strain ATCC 204508 / S288c) GN=CLC1 PE=1 SV=1	323.905	true	2	26532	9	9	12	12	9	9	10	21053602	21053602
77310	SC160_YEAST	SCP160	sp|P06105|SC160_YEAST Protein SCP160 OS=Saccharomyces cerevisiae (strain ATCC 204508 / S288c) GN=SCP160 PE=1 SV=3	226.326	true	2	134810	9	9	9	9	9	9	9	6.89469e+06	6.89469e+06
77311	NUG1_YEAST	NUG1	sp|P40010|NUG1_YEAST Nuclear GTP-binding protein NUG1 OS=Saccharomyces cerevisiae (strain ATCC 204508 / S288c) GN=NUG1 PE=1 SV=1	24.135	true	2	57709	1	1	1	1	1	1	1	91513.3	91513.3
77312	ATP5E_YEAST	ATP15	sp|P21306|ATP5E_YEAST ATP synthase subunit epsilon, mitochondrial OS=Saccharomyces cerevisiae (strain ATCC 204508 / S288c) GN=ATP15 PE=1 SV=2	190.639	true	2	6743	4	4	5	5	4	4	4	19190294	19190294
77313	GRPE_YEAST	MGE1	sp|P38523|GRPE_YEAST GrpE protein homolog, mitochondrial OS=Saccharomyces cerevisiae (strain ATCC 204508 / S288c) GN=MGE1 PE=1 SV=1	193.364	true	2	26066	8	8	8	8	8	8	8	13584098	13584098
77315	TUP1_YEAST	TUP1	sp|P16649|TUP1_YEAST General transcriptional corepressor TUP1 OS=Saccharomyces cerevisiae (strain ATCC 204508 / S288c) GN=TUP1 PE=1 SV=2	56.24	true	2	78308	3	3	3	3	2	2	2	545415	545415
77316	GLRX2_YEAST	GRX2	sp|P17695|GLRX2_YEAST Glutaredoxin-2, mitochondrial OS=Saccharomyces cerevisiae (strain ATCC 204508 / S288c) GN=GRX2 PE=1 SV=3	229.118	true	2	15861	6	6	7	7	6	6	6	21267792	21267792
77317	RT102_YEAST	RTT102	sp|P53330|RT102_YEAST Regulator of Ty1 transposition protein 102 OS=Saccharomyces cerevisiae (strain ATCC 204508 / S288c) GN=RTT102 PE=1 SV=2	194.499	true	2	17795	5	5	6	6	5	5	5	4666224	4666224
77318	ALDH4_YEAST	ALD4	sp|P46367|ALDH4_YEAST Potassium-activated aldehyde dehydrogenase, mitochondrial OS=Saccharomyces cerevisiae (strain ATCC 204508 / S288c) GN=ALD4 PE=1 SV=2	96.943	true	2	56724	4	4	4	4	4	4	4	2509918	2509918
77319	MRP8_YEAST	MRP8	sp|P35719|MRP8_YEAST Uncharacterized protein MRP8 OS=Saccharomyces cerevisiae (strain ATCC 204508 / S288c) GN=MRP8 PE=1 SV=1	63.037	true	2	25097	3	3	3	3	3	3	3	2982723	2982723
77320	IGO1_YEAST	IGO1	sp|P53897|IGO1_YEAST mRNA stability protein IGO1 OS=Saccharomyces cerevisiae (strain ATCC 204508 / S288c) GN=IGO1 PE=1 SV=1	11.703	true	2	18051	1	1	1	1	1	1	1	577357	577357
77321	FMP45_YEAST	FMP45	sp|Q07651|FMP45_YEAST SUR7 family protein FMP45 OS=Saccharomyces cerevisiae (strain ATCC 204508 / S288c) GN=FMP45 PE=1 SV=1	161.222	true	2	34135	6	6	7	7	6	6	6	14572348	14572348
77322	COFI_YEAST	COF1	sp|Q03048|COFI_YEAST Cofilin OS=Saccharomyces cerevisiae (strain ATCC 204508 / S288c) GN=COF1 PE=1 SV=1	113.143	true	2	15901	2	2	2	2	2	2	2	2.10491e+06	2.10491e+06
77323	TMA10_YEAST	TMA10	sp|Q06177|TMA10_YEAST Translation machinery-associated protein 10 OS=Saccharomyces cerevisiae (strain ATCC 204508 / S288c) GN=TMA10 PE=1 SV=3	239.883	true	2	9834	6	6	10	10	6	6	8	35841964	35841964
77324	SDO1L_YEAST	RTC3	sp|P38804|SDO1L_YEAST Restriction of telomere capping protein 3 OS=Saccharomyces cerevisiae (strain ATCC 204508 / S288c) GN=RTC3 PE=1 SV=1	305.713	true	2	12009	6	6	9	9	6	6	8	18707504	18707504
77325	AVT3_YEAST	AVT3	sp|P36062|AVT3_YEAST Vacuolar amino acid transporter 3 OS=Saccharomyces cerevisiae (strain ATCC 204508 / S288c) GN=AVT3 PE=1 SV=1	79.082	true	2	75459	1	1	1	1	1	1	1	142272	142272
77326	RPC5_YEAST	RPC37	sp|P36121|RPC5_YEAST DNA-directed RNA polymerase III subunit RPC5 OS=Saccharomyces cerevisiae (strain ATCC 204508 / S288c) GN=RPC37 PE=1 SV=1	27.097	true	2	32142	1	1	1	1	1	1	1	826442	826442
77327	ETFB_YEAST	CIR1	sp|P42940|ETFB_YEAST Probable electron transfer flavoprotein subunit beta OS=Saccharomyces cerevisiae (strain ATCC 204508 / S288c) GN=CIR1 PE=1 SV=1	97.218	true	2	28759	3	3	3	3	3	3	3	1.11283e+06	1.11283e+06
77329	NOP8_YEAST	NOP8	sp|Q08287|NOP8_YEAST 60S ribosome subunit biogenesis protein NOP8 OS=Saccharomyces cerevisiae (strain ATCC 204508 / S288c) GN=NOP8 PE=1 SV=1	15.416	true	2	56966	1	1	1	1	1	1	1	592226	592226
77330	ERG6_YEAST	ERG6	sp|P25087|ERG6_YEAST Sterol 24-C-methyltransferase OS=Saccharomyces cerevisiae (strain ATCC 204508 / S288c) GN=ERG6 PE=1 SV=4	79.554	true	2	43431	3	3	3	3	3	3	3	1.42561e+06	1.42561e+06
77331	RL22A_YEAST	RPL22A	sp|P05749|RL22A_YEAST 60S ribosomal protein L22-A OS=Saccharomyces cerevisiae (strain ATCC 204508 / S288c) GN=RPL22A PE=1 SV=3	72.612	true	2	13693	1	1	1	1	1	1	1	900085	900085
77332	GLNA_YEAST	GLN1	sp|P32288|GLNA_YEAST Glutamine synthetase OS=Saccharomyces cerevisiae (strain ATCC 204508 / S288c) GN=GLN1 PE=1 SV=4	20.028	true	2	41766	1	1	1	1	1	1	1	323108	323108
77333	EIF3J_YEAST	HCR1	sp|Q05775|EIF3J_YEAST Eukaryotic translation initiation factor 3 subunit J OS=Saccharomyces cerevisiae (strain ATCC 204508 / S288c) GN=HCR1 PE=1 SV=1	86.076	true	2	29564	3	3	4	4	3	3	3	5318154	5318154
77334	PUB1_YEAST	PUB1	sp|P32588|PUB1_YEAST Nuclear and cytoplasmic polyadenylated RNA-binding protein PUB1 OS=Saccharomyces cerevisiae (strain ATCC 204508 / S288c) GN=PUB1 PE=1 SV=4	70.197	true	2	50763	2	2	2	2	2	2	2	2.52657e+06	2.52657e+06
77335	ACON_YEAST	ACO1	sp|P19414|ACON_YEAST Aconitate hydratase, mitochondrial OS=Saccharomyces cerevisiae (strain ATCC 204508 / S288c) GN=ACO1 PE=1 SV=2	55.753	true	2	85368	3	3	3	3	3	3	3	1.1143e+06	1.1143e+06
77336	EDE1_YEAST	EDE1	sp|P34216|EDE1_YEAST EH domain-containing and endocytosis protein 1 OS=Saccharomyces cerevisiae (strain ATCC 204508 / S288c) GN=EDE1 PE=1 SV=2	267.691	true	2	150783	7	7	8	8	7	7	7	6593927	6593927
77337	EF1B_YEAST	EFB1	sp|P32471|EF1B_YEAST Elongation factor 1-beta OS=Saccharomyces cerevisiae (strain ATCC 204508 / S288c) GN=EFB1 PE=1 SV=4	397.78	true	2	22627	8	8	15	15	8	8	14	79970040	79970040
77338	RBG2_YEAST	RBG2	sp|P53295|RBG2_YEAST Ribosome-interacting GTPase 2 OS=Saccharomyces cerevisiae (strain ATCC 204508 / S288c) GN=RBG2 PE=1 SV=1	21.659	true	2	41006	1	1	1	1	1	1	1	209620	209620
77339	SRP40_YEAST	SRP40	sp|P32583|SRP40_YEAST Suppressor protein SRP40 OS=Saccharomyces cerevisiae (strain ATCC 204508 / S288c) GN=SRP40 PE=1 SV=2	99.291	true	2	41015	5	5	6	6	5	5	6	8776555	8776555
77340	YD85C_YEAST	YDL085C-A	sp|Q3E7B7|YD85C_YEAST SERF-like protein YDL085C-A OS=Saccharomyces cerevisiae (strain ATCC 204508 / S288c) GN=YDL085C-A PE=1 SV=1	20.937	true	2	7949	1	1	1	1	1	1	1	2.8665e+06	2.8665e+06
77342	G6PI_YEAST	PGI1	sp|P12709|G6PI_YEAST Glucose-6-phosphate isomerase OS=Saccharomyces cerevisiae (strain ATCC 204508 / S288c) GN=PGI1 PE=1 SV=3	38.706	true	2	61299	2	2	2	2	2	2	2	386850	386850
77343	NOT5_YEAST	NOT5	sp|Q12514|NOT5_YEAST General negative regulator of transcription subunit 5 OS=Saccharomyces cerevisiae (strain ATCC 204508 / S288c) GN=NOT5 PE=1 SV=1	31.509	true	2	65855	1	1	1	1	1	1	1	458071	458071
77344	CDS1_YEAST	CDS1	sp|P38221|CDS1_YEAST Phosphatidate cytidylyltransferase OS=Saccharomyces cerevisiae (strain ATCC 204508 / S288c) GN=CDS1 PE=1 SV=1	18.986	true	2	51823	1	1	3	3	1	1	3	102845912	102845912
77345	SAP30_YEAST	SAP30	sp|P38429|SAP30_YEAST Transcriptional regulatory protein SAP30 OS=Saccharomyces cerevisiae (strain ATCC 204508 / S288c) GN=SAP30 PE=1 SV=2	35.921	true	2	23026	2	2	2	2	2	2	2	599945	599945
77346	TPO1_YEAST	TPO1	sp|Q07824|TPO1_YEAST Polyamine transporter 1 OS=Saccharomyces cerevisiae (strain ATCC 204508 / S288c) GN=TPO1 PE=1 SV=1	26.225	true	2	64272	1	1	1	1	1	1	1	183870	183870
77347	EDC3_YEAST	EDC3	sp|P39998|EDC3_YEAST Enhancer of mRNA-decapping protein 3 OS=Saccharomyces cerevisiae (strain ATCC 204508 / S288c) GN=EDC3 PE=1 SV=1	78.981	true	2	61340	2	2	2	2	2	2	2	518121	518121
77348	CH10_YEAST	HSP10	sp|P38910|CH10_YEAST 10 kDa heat shock protein, mitochondrial OS=Saccharomyces cerevisiae (strain ATCC 204508 / S288c) GN=HSP10 PE=1 SV=1	229.445	true	2	11372	7	7	7	7	7	7	7	24737478	24737478
77349	LHP1_YEAST	LHP1	sp|P33399|LHP1_YEAST La protein homolog OS=Saccharomyces cerevisiae (strain ATCC 204508 / S288c) GN=LHP1 PE=1 SV=2	92.356	true	2	32104	3	3	3	3	3	3	3	2.28904e+06	2.28904e+06
77350	SSBP1_YEAST	SBP1	sp|P10080|SSBP1_YEAST Single-stranded nucleic acid-binding protein OS=Saccharomyces cerevisiae (strain ATCC 204508 / S288c) GN=SBP1 PE=1 SV=2	323.232	true	2	32990	9	9	12	12	9	9	10	38923168	38923168
77351	PABP_YEAST	PAB1	sp|P04147|PABP_YEAST Polyadenylate-binding protein, cytoplasmic and nuclear OS=Saccharomyces cerevisiae (strain ATCC 204508 / S288c) GN=PAB1 PE=1 SV=4	758.609	true	2	64344	21	21	24	24	20	20	22	25346434	25346434
77352	ATPF_YEAST	ATP4	sp|P05626|ATPF_YEAST ATP synthase subunit 4, mitochondrial OS=Saccharomyces cerevisiae (strain ATCC 204508 / S288c) GN=ATP4 PE=1 SV=2	37.7	true	2	26925	2	2	2	2	2	2	2	388962	388962
77353	CUE5_YEAST	CUE5	sp|Q08412|CUE5_YEAST Ubiquitin-binding protein CUE5 OS=Saccharomyces cerevisiae (strain ATCC 204508 / S288c) GN=CUE5 PE=1 SV=1	266.264	true	2	46870	12	12	12	12	12	12	12	15103933	15103933
77354	TMA17_YEAST	TMA17	sp|Q12513|TMA17_YEAST Translation machinery-associated protein 17 OS=Saccharomyces cerevisiae (strain ATCC 204508 / S288c) GN=TMA17 PE=1 SV=1	295.681	true	2	16771	7	7	7	7	7	7	7	9683722	9683722
77355	GCSH_YEAST	GCV3	sp|P39726|GCSH_YEAST Glycine cleavage system H protein, mitochondrial OS=Saccharomyces cerevisiae (strain ATCC 204508 / S288c) GN=GCV3 PE=1 SV=3	91.254	true	2	18793	3	3	3	3	3	3	3	2694350	2694350
77356	HMO1_YEAST	HMO1	sp|Q03973|HMO1_YEAST High mobility group protein 1 OS=Saccharomyces cerevisiae (strain ATCC 204508 / S288c) GN=HMO1 PE=1 SV=1	21.866	true	2	27544	1	1	1	1	1	1	1	522451	522451
77357	RCN2_YEAST	RCN2	sp|Q12044|RCN2_YEAST Regulator of calcineurin 2 OS=Saccharomyces cerevisiae (strain ATCC 204508 / S288c) GN=RCN2 PE=1 SV=1	226.021	true	2	29256	5	5	8	8	5	5	7	7487159	7487159
77359	NU159_YEAST	NUP159	sp|P40477|NU159_YEAST Nucleoporin NUP159 OS=Saccharomyces cerevisiae (strain ATCC 204508 / S288c) GN=NUP159 PE=1 SV=1	19.025	true	2	158908	1	1	1	1	1	1	1	216077	216077
77360	NUP1_YEAST	NUP1	sp|P20676|NUP1_YEAST Nucleoporin NUP1 OS=Saccharomyces cerevisiae (strain ATCC 204508 / S288c) GN=NUP1 PE=1 SV=1	22.15	true	2	113581	2	2	2	2	2	2	2	631232	631232
77361	INP52_YEAST	INP52	sp|P50942|INP52_YEAST Polyphosphatidylinositol phosphatase INP52 OS=Saccharomyces cerevisiae (strain ATCC 204508 / S288c) GN=INP52 PE=1 SV=1	14.516	true	2	133331	1	1	1	1	1	1	1	46738.1	46738.1
77362	AIM17_YEAST	AIM17	sp|P23180|AIM17_YEAST Probable oxidoreductase AIM17 OS=Saccharomyces cerevisiae (strain ATCC 204508 / S288c) GN=AIM17 PE=1 SV=2	17.975	true	2	53135	1	1	1	1	1	1	1	144716	144716
77363	MDM35_YEAST	MDM35	sp|O60200|MDM35_YEAST Mitochondrial distribution and morphology protein 35 OS=Saccharomyces cerevisiae (strain ATCC 204508 / S288c) GN=MDM35 PE=1 SV=3	22.41	true	2	9712	1	1	1	1	1	1	1	510637	510637
77364	RSP5_YEAST	RSP5	sp|P39940|RSP5_YEAST E3 ubiquitin-protein ligase RSP5 OS=Saccharomyces cerevisiae (strain ATCC 204508 / S288c) GN=RSP5 PE=1 SV=1	42.315	true	2	91816	2	2	2	2	2	2	2	953474	953474
77365	QCR6_YEAST	QCR6	sp|P00127|QCR6_YEAST Cytochrome b-c1 complex subunit 6 OS=Saccharomyces cerevisiae (strain ATCC 204508 / S288c) GN=QCR6 PE=1 SV=2	51.428	true	2	17257	2	2	4	4	2	2	3	13872828	13872828
77366	CYAA_YEAST	CYR1	sp|P08678|CYAA_YEAST Adenylate cyclase OS=Saccharomyces cerevisiae (strain ATCC 204508 / S288c) GN=CYR1 PE=1 SV=2	16.044	true	2	227834	1	1	1	1	1	1	1	779198	779198
77367	COX12_YEAST	COX12	sp|Q01519|COX12_YEAST Cytochrome c oxidase subunit 6B OS=Saccharomyces cerevisiae (strain ATCC 204508 / S288c) GN=COX12 PE=1 SV=2	120.325	true	2	9788	2	2	4	4	2	2	4	9797304	9797304
77368	ALF_YEAST	FBA1	sp|P14540|ALF_YEAST Fructose-bisphosphate aldolase OS=Saccharomyces cerevisiae (strain ATCC 204508 / S288c) GN=FBA1 PE=1 SV=3	237.522	true	2	39621	5	5	7	7	4	4	4	5572445	5572445
77369	RL5_YEAST	RPL5	sp|P26321|RL5_YEAST 60S ribosomal protein L5 OS=Saccharomyces cerevisiae (strain ATCC 204508 / S288c) GN=RPL5 PE=1 SV=4	43.278	true	2	33715	1	1	1	1	1	1	1	2.31945e+06	2.31945e+06
77370	RTN2_YEAST	RTN2	sp|Q12443|RTN2_YEAST Reticulon-like protein 2 OS=Saccharomyces cerevisiae (strain ATCC 204508 / S288c) GN=RTN2 PE=1 SV=1	502.298	true	2	44359	11	11	21	21	11	11	18	37937480	37937480
77371	GLO3_YEAST	GLO3	sp|P38682|GLO3_YEAST ADP-ribosylation factor GTPase-activating protein GLO3 OS=Saccharomyces cerevisiae (strain ATCC 204508 / S288c) GN=GLO3 PE=1 SV=1	22.307	true	2	55094	1	1	1	1	1	1	1	714954	714954
77372	VATE_YEAST	VMA4	sp|P22203|VATE_YEAST V-type proton ATPase subunit E OS=Saccharomyces cerevisiae (strain ATCC 204508 / S288c) GN=VMA4 PE=1 SV=4	266.1	true	2	26471	7	7	9	9	7	7	9	18345812	18345812
77373	YHT8_YEAST	YHR138C	sp|P38841|YHT8_YEAST Uncharacterized protein YHR138C OS=Saccharomyces cerevisiae (strain ATCC 204508 / S288c) GN=YHR138C PE=1 SV=1	27.181	true	2	12753	1	1	1	1	1	1	1	185410	185410
77374	AP3D_YEAST	APL5	sp|Q08951|AP3D_YEAST AP-3 complex subunit delta OS=Saccharomyces cerevisiae (strain ATCC 204508 / S288c) GN=APL5 PE=1 SV=1	15.978	true	2	106924	1	1	1	1	0
77375	IF2P_YEAST	FUN12	sp|P39730|IF2P_YEAST Eukaryotic translation initiation factor 5B OS=Saccharomyces cerevisiae (strain ATCC 204508 / S288c) GN=FUN12 PE=1 SV=2	84.741	true	2	112268	3	3	3	3	3	3	3	3574585	3574585
77376	PT191_YEAST	PET191	sp|Q02772|PT191_YEAST Mitochondrial protein PET191 OS=Saccharomyces cerevisiae (strain ATCC 204508 / S288c) GN=PET191 PE=1 SV=1	68.766	true	2	12394	3	3	3	3	3	3	3	5278699	5278699
77377	YAR1_YEAST	YAR1	sp|P46683|YAR1_YEAST Ankyrin repeat-containing protein YAR1 OS=Saccharomyces cerevisiae (strain ATCC 204508 / S288c) GN=YAR1 PE=1 SV=1	70.304	true	2	22356	2	2	2	2	2	2	2	1.05977e+06	1.05977e+06
77378	SCD6_YEAST	SCD6	sp|P45978|SCD6_YEAST Protein SCD6 OS=Saccharomyces cerevisiae (strain ATCC 204508 / S288c) GN=SCD6 PE=1 SV=1	177.688	true	2	39190	4	4	4	4	4	4	4	3.69645e+06	3.69645e+06
77380	CASP_YEAST	COY1	sp|P34237|CASP_YEAST Protein CASP OS=Saccharomyces cerevisiae (strain ATCC 204508 / S288c) GN=COY1 PE=1 SV=2	27.566	true	2	77514	2	2	2	2	2	2	2	582562	582562
77381	RM44_YEAST	MRPL44	sp|P19956|RM44_YEAST 54S ribosomal protein L44, mitochondrial OS=Saccharomyces cerevisiae (strain ATCC 204508 / S288c) GN=MRPL44 PE=1 SV=1	27.922	true	2	11476	1	1	2	2	1	1	2	232200	232200
77382	YG1D_YEAST	YGR021W	sp|P53212|YG1D_YEAST Probable transcriptional regulatory protein HAH1 OS=Saccharomyces cerevisiae (strain ATCC 204508 / S288c) GN=YGR021W PE=1 SV=1	18.387	true	2	31700	1	1	1	1	1	1	1	291002	291002
77383	PPN1_YEAST	PPN1	sp|Q04119|PPN1_YEAST Endopolyphosphatase OS=Saccharomyces cerevisiae (strain ATCC 204508 / S288c) GN=PPN1 PE=1 SV=1	39.456	true	2	78344	2	2	2	2	2	2	2	1.29527e+06	1.29527e+06
77384	COX4_YEAST	COX4	sp|P04037|COX4_YEAST Cytochrome c oxidase subunit 4, mitochondrial OS=Saccharomyces cerevisiae (strain ATCC 204508 / S288c) GN=COX4 PE=1 SV=1	524.156	true	2	17143	12	12	39	39	12	12	25	128602568	128602568
77385	MMS2_YEAST	MMS2	sp|P53152|MMS2_YEAST Ubiquitin-conjugating enzyme variant MMS2 OS=Saccharomyces cerevisiae (strain ATCC 204508 / S288c) GN=MMS2 PE=1 SV=1	81.17	true	2	15545	3	3	3	3	3	3	3	2.23108e+06	2.23108e+06
77386	CAP_YEAST	SRV2	sp|P17555|CAP_YEAST Adenylyl cyclase-associated protein OS=Saccharomyces cerevisiae (strain ATCC 204508 / S288c) GN=SRV2 PE=1 SV=1	106.331	true	2	57521	3	3	3	3	3	3	3	1.76917e+06	1.76917e+06
77387	NDH1_YEAST	NDE1	sp|P40215|NDH1_YEAST External NADH-ubiquinone oxidoreductase 1, mitochondrial OS=Saccharomyces cerevisiae (strain ATCC 204508 / S288c) GN=NDE1 PE=1 SV=1	63.037	true	2	62774	3	3	3	3	3	3	3	1.13175e+06	1.13175e+06
77388	RSM28_YEAST	RSM28	sp|Q03430|RSM28_YEAST 37S ribosomal protein RSM28, mitochondrial OS=Saccharomyces cerevisiae (strain ATCC 204508 / S288c) GN=RSM28 PE=1 SV=2	42.847	true	2	41216	1	1	1	1	1	1	1	192644	192644
